# Supplementary material for: WITHDRAWN: Analysis of Autophagy-Related Signatures in The Tumor Immune Microenvironment and Identification of Clinical Prognostic Markers in Bladder Carcinoma
Source: Research Square preprint supplement (doi:10.21203/rs.3.rs-1187613/v1), 2021-12-29
Supplement: Supplementary file 1 [file 1a42d977c263159370b5d12c.xlsx]

## Sheet: Clinical information of TCGA
	time	status	age	gender	grade	stage	vital_status
TCGA-2F-A9KO-01A	734	1	63	male	High Grade	Stage IV	Dead
TCGA-2F-A9KP-01A	364	1	66	male	High Grade	Stage IV	Dead
TCGA-2F-A9KQ-01A	2886	0	69	male	High Grade	Stage III	Alive
TCGA-2F-A9KR-01A	3183	1	59	female	High Grade	Stage III	Dead
TCGA-2F-A9KT-01A	2352	0	83	male	High Grade	Stage II	Alive
TCGA-2F-A9KW-01A	254	1	67	female	High Grade	Stage III	Dead
TCGA-4Z-AA7M-01A	495	0	65	male	High Grade	Stage III	Alive
TCGA-4Z-AA7N-01A	1367	1	65	male	High Grade	Stage III	Dead
TCGA-4Z-AA7O-01A	512	0	64	male	High Grade	Stage II	Alive
TCGA-4Z-AA7Q-01A	510	1	79	male	High Grade	Stage III	Dead
TCGA-4Z-AA7R-01A	522	1	73	male	High Grade	Stage IV	Dead
TCGA-4Z-AA7S-01A	1064	1	66	male	High Grade	Stage III	Dead
TCGA-4Z-AA7W-01A	840	0	55	male	High Grade	Stage II	Alive
TCGA-4Z-AA7Y-01A	1522	0	60	male	High Grade	Stage II	Alive
TCGA-4Z-AA81-01A	1270	1	80	male	High Grade	Stage II	Dead
TCGA-4Z-AA82-01A	1556	1	59	male	High Grade	Stage IV	Dead
TCGA-4Z-AA83-01A	2024	0	52	male	High Grade	Stage II	Alive
TCGA-4Z-AA84-01A	460	0	61	male	High Grade	Stage IV	Alive
TCGA-4Z-AA86-01A	311	1	66	male	High Grade	Stage IV	Dead
TCGA-4Z-AA87-01A	1454	0	72	male	High Grade	Stage III	Alive
TCGA-4Z-AA89-01A	1029	0	60	male	High Grade	Stage IV	Alive
TCGA-5N-A9KI-01A	76	1	76	female	High Grade	Stage III	Dead
TCGA-5N-A9KM-01A	530	1	73	female	High Grade	Stage III	Dead
TCGA-BL-A0C8-01A	1219	0	73	male	High Grade	Stage I	Alive
TCGA-BL-A0C8-01B	1219	0	73	male	High Grade	Stage I	Alive
TCGA-BL-A13I-01A	223	1	57	female	High Grade	Stage III	Dead
TCGA-BL-A13I-01B	223	1	57	female	High Grade	Stage III	Dead
TCGA-BL-A13J-01A	81	1	65	male	High Grade	Stage IV	Dead
TCGA-BL-A13J-01B	81	1	65	male	High Grade	Stage IV	Dead
TCGA-BL-A3JM-01A	205	1	62	male	High Grade	Stage III	Dead
TCGA-BL-A5ZZ-01A	377	0	80	female	High Grade	Stage III	Alive
TCGA-BT-A0S7-01A	200	1	75	male	High Grade	Stage III	Dead
TCGA-BT-A0YX-01A	400	1	70	female	High Grade	Stage III	Dead
TCGA-BT-A20J-01A	579	1	75	male	High Grade	Stage II	Dead
TCGA-BT-A20N-01A	795	1	72	male	High Grade	Stage III	Dead
TCGA-BT-A20O-01A	370	1	75	male	High Grade	Stage III	Dead
TCGA-BT-A20P-01A	544	1	81	female	High Grade	Stage III	Dead
TCGA-BT-A20Q-01A	593	1	73	male	High Grade	Stage IV	Dead
TCGA-BT-A20R-01A	154	1	79	female	High Grade	Stage IV	Dead
TCGA-BT-A20T-01A	453	1	63	male	High Grade	Stage IV	Dead
TCGA-BT-A20U-01A	455	1	70	female	High Grade	Stage III	Dead
TCGA-BT-A20V-01A	154	1	59	female	High Grade	Stage IV	Dead
TCGA-BT-A20W-01A	254	1	71	male	High Grade	Stage II	Dead
TCGA-BT-A20X-01A	251	1	56	male	High Grade	Stage IV	Dead
TCGA-BT-A2LA-01A	522	0	54	male	High Grade	Stage III	Alive
TCGA-BT-A2LB-01A	492	1	73	female	High Grade	Stage III	Dead
TCGA-BT-A2LD-01A	623	1	78	female	High Grade	Stage IV	Dead
TCGA-BT-A3PH-01A	142	1	76	male	High Grade	Stage IV	Dead
TCGA-BT-A3PJ-01A	789	0	76	male	High Grade	Stage III	Alive
TCGA-BT-A3PK-01A	303	1	80	male	High Grade	Stage II	Dead
TCGA-BT-A42C-01A	873	0	64	male	High Grade	Stage II	Alive
TCGA-BT-A42E-01A	1108	0	74	male	High Grade	Stage III	Alive
TCGA-BT-A42F-01A	864	0	64	male	High Grade	Stage IV	Alive
TCGA-C4-A0EZ-01A	273	1	69	female	High Grade	Stage IV	Dead
TCGA-C4-A0F0-01A	59	0	60	male	High Grade	Stage II	Alive
TCGA-C4-A0F1-01A	89	0	71	male	High Grade	Stage III	Alive
TCGA-C4-A0F6-01A	700	0	82	female	High Grade	Stage III	Alive
TCGA-C4-A0F7-01A	62	1	77	male	High Grade	Stage IV	Dead
TCGA-CF-A1HR-01A	389	0	62	male	High Grade	Stage III	Alive
TCGA-CF-A1HS-01A	382	0	75	female	High Grade	Stage III	Alive
TCGA-CF-A27C-01A	425	0	52	male	High Grade	Stage III	Alive
TCGA-CF-A3MF-01A	383	0	34	male	Low Grade	Stage III	Alive
TCGA-CF-A3MG-01A	369	0	48	male	Low Grade	Stage II	Alive
TCGA-CF-A3MH-01A	398	0	75	male	Low Grade	Stage II	Alive
TCGA-CF-A3MI-01A	370	0	62	male	Low Grade	Stage II	Alive
TCGA-CF-A47S-01A	333	0	41	male	Low Grade	Stage II	Alive
TCGA-CF-A47T-01A	385	1	58	female	Low Grade	Stage II	Dead
TCGA-CF-A47V-01A	379	0	52	male	High Grade	Stage II	Alive
TCGA-CF-A47W-01A	368	0	42	male	Low Grade	Stage II	Alive
TCGA-CF-A47X-01A	384	0	60	male	Low Grade	Stage II	Alive
TCGA-CF-A47Y-01A	373	0	55	male	Low Grade	Stage II	Alive
TCGA-CF-A5U8-01A	399	0	59	male	Low Grade	Stage II	Alive
TCGA-CF-A5UA-01A	365	0	67	male	Low Grade	Stage II	Alive
TCGA-CF-A7I0-01A	368	0	54	male	Low Grade	Stage II	Alive
TCGA-CF-A8HX-01A	345	0	55	female	High Grade	Stage II	Alive
TCGA-CF-A8HY-01A	345	0	59	male	High Grade	Stage II	Alive
TCGA-CF-A9FF-01A	361	0	52	male	High Grade	Stage II	Alive
TCGA-CF-A9FL-01A	565	1	85	male	High Grade	Stage III	Dead
TCGA-CF-A9FM-01A	398	0	50	male	High Grade	Stage I	Alive
TCGA-CU-A0YN-01A	393	1	60	male	High Grade	Stage III	Dead
TCGA-CU-A0YO-01A	149	1	84	male	High Grade	Stage IV	Dead
TCGA-CU-A0YR-01A	460	1	83	male	High Grade	Stage IV	Dead
TCGA-CU-A3KJ-01A	562	0	75	male	High Grade	Stage III	Alive
TCGA-CU-A3QU-01A	158	0	58	male	High Grade	Stage IV	Alive
TCGA-CU-A3YL-01A	906	0	67	male	High Grade	Stage III	Alive
TCGA-CU-A5W6-01A	56	1	70	male	High Grade	Stage III	Dead
TCGA-CU-A72E-01A	413	1	76	male	High Grade	Stage IV	Dead
TCGA-DK-A1A3-01A	665	1	60	male	High Grade	Stage IV	Dead
TCGA-DK-A1A5-01A	65	1	79	male	High Grade	Stage II	Dead
TCGA-DK-A1A6-01A	2020	0	53	male	High Grade	Stage IV	Alive
TCGA-DK-A1A7-01A	560	0	67	female	High Grade	Stage IV	Alive
TCGA-DK-A1AA-01A	578	0	57	male	High Grade	Stage III	Alive
TCGA-DK-A1AB-01A	508	1	74	female	High Grade	Stage IV	Dead
TCGA-DK-A1AC-01A	3981	0	72	male	High Grade	Stage III	Alive
TCGA-DK-A1AD-01A	3420	0	69	male	High Grade	Stage IV	Alive
TCGA-DK-A1AE-01A	491	0	84	male	High Grade	Stage III	Alive
TCGA-DK-A1AF-01A	536	0	84	female	High Grade	Stage IV	Alive
TCGA-DK-A1AG-01A	475	0	65	male	High Grade	Stage III	Alive
TCGA-DK-A2HX-01A	1420	1	80	female	High Grade	Stage IV	Dead
TCGA-DK-A2I1-01A	546	0	73	female	High Grade	Stage II	Alive
TCGA-DK-A2I2-01A	237	1	63	female	High Grade	Stage IV	Dead
TCGA-DK-A2I4-01A	3835	0	79	male	High Grade	Stage III	Alive
TCGA-DK-A2I6-01A	2656	0	81	male	High Grade	Stage IV	Alive
TCGA-DK-A3IK-01A	146	1	87	male	High Grade	Stage IV	Dead
TCGA-DK-A3IL-01A	413	1	79	female	High Grade	Stage IV	Dead
TCGA-DK-A3IM-01A	248	1	76	male	High Grade	Stage III	Dead
TCGA-DK-A3IN-01A	250	1	72	male	High Grade	Stage III	Dead
TCGA-DK-A3IQ-01A	539	1	74	male	High Grade	Stage III	Dead
TCGA-DK-A3IS-01A	1529	0	68	male	High Grade	Stage II	Alive
TCGA-DK-A3IT-01A	648	0	62	male	High Grade	Stage III	Alive
TCGA-DK-A3IU-01A	706	1	58	male	High Grade	Stage II	Dead
TCGA-DK-A3IV-01A	294	1	60	male	High Grade	Stage II	Dead
TCGA-DK-A3WW-01A	633	0	57	male	High Grade	Stage III	Alive
TCGA-DK-A3WX-01A	321	1	67	female	High Grade	Stage III	Dead
TCGA-DK-A3WY-01A	4967	0	67	female	High Grade	Stage III	Alive
TCGA-DK-A3X1-01A	2009	0	78	female	High Grade	Stage III	Alive
TCGA-DK-A3X2-01A	547	1	85	male	High Grade	Stage IV	Dead
TCGA-DK-A6AV-01A	1952	0	82	female	High Grade	Stage II	Alive
TCGA-DK-A6AW-01A	1621	0	70	male	High Grade	Stage II	Alive
TCGA-DK-A6B0-01A	2330	0	61	male	High Grade	Stage II	Alive
TCGA-DK-A6B1-01A	2049	0	67	male	High Grade	Stage II	Alive
TCGA-DK-A6B2-01A	477	0	70	male	High Grade	Stage IV	Alive
TCGA-DK-A6B5-01A	1542	0	45	male	High Grade	Stage IV	Alive
TCGA-DK-A6B6-01A	1115	0	57	male	High Grade	Stage II	Alive
TCGA-DK-AA6L-01A	1163	1	48	male	High Grade	Stage IV	Dead
TCGA-DK-AA6M-01A	1582	0	64	female	High Grade	Stage II	Alive
TCGA-DK-AA6P-01A	457	0	72	female	High Grade	Stage II	Alive
TCGA-DK-AA6Q-01A	413	1	61	female	High Grade	Stage IV	Dead
TCGA-DK-AA6R-01A	5041	0	68	male	High Grade	Stage IV	Alive
TCGA-DK-AA6S-01A	5050	0	60	male	High Grade	Stage III	Alive
TCGA-DK-AA6T-01A	572	0	63	male	High Grade	Stage II	Alive
TCGA-DK-AA6W-01A	415	1	78	male	High Grade	Stage II	Dead
TCGA-DK-AA6X-01A	467	0	63	male	High Grade	Stage II	Alive
TCGA-DK-AA71-01A	415	0	71	male	High Grade	Stage II	Alive
TCGA-DK-AA74-01A	1708	0	75	male	High Grade	Stage III	Alive
TCGA-DK-AA75-01A	340	1	82	male	High Grade	Stage III	Dead
TCGA-DK-AA76-01A	366	0	64	female	High Grade	Stage II	Alive
TCGA-DK-AA77-01A	618	0	61	male	High Grade	Stage II	Alive
TCGA-E5-A2PC-01A	1326	0	61	female	High Grade	Stage IV	Alive
TCGA-E5-A4TZ-01A	467	1	64	male	High Grade	Stage IV	Dead
TCGA-E5-A4U1-01A	1181	0	72	male	High Grade	Stage II	Alive
TCGA-E7-A3X6-01A	904	1	70	male	Low Grade	Stage II	Dead
TCGA-E7-A3Y1-01A	163	0	57	male	Low Grade	Stage II	Alive
TCGA-E7-A4IJ-01A	674	1	56	male	High Grade	Stage II	Dead
TCGA-E7-A4XJ-01A	68	1	66	male	High Grade	Stage II	Dead
TCGA-E7-A519-01A	508	0	72	male	High Grade	Stage II	Alive
TCGA-E7-A541-01A	778	1	66	male	High Grade	Stage II	Dead
TCGA-E7-A677-01A	820	0	81	male	Low Grade	Stage II	Alive
TCGA-E7-A678-01A	798	0	55	male	Low Grade	Stage III	Alive
TCGA-E7-A6MD-01A	129	0	66	male	High Grade	Stage IV	Alive
TCGA-E7-A6ME-01A	731	0	75	male	High Grade	Stage II	Alive
TCGA-E7-A6MF-01A	750	0	37	male	Low Grade	Stage II	Alive
TCGA-E7-A7DV-01A	37	0	44	male	High Grade	Stage IV	Alive
TCGA-E7-A7PW-01A	416	0	63	male	High Grade	Stage III	Alive
TCGA-E7-A7XN-01A	428	0	66	male	High Grade	Stage III	Alive
TCGA-E7-A85H-01A	394	0	64	male	High Grade	Stage III	Alive
TCGA-E7-A8O7-01A	466	0	52	male	Low Grade	Stage II	Alive
TCGA-E7-A97P-01A	437	1	73	male	High Grade	Stage II	Dead
TCGA-E7-A97Q-01A	246	1	60	female	High Grade	Stage IV	Dead
TCGA-FD-A3B3-01A	974	1	74	female	High Grade	Stage III	Dead
TCGA-FD-A3B4-01A	510	1	55	female	High Grade	Stage III	Dead
TCGA-FD-A3B5-01A	272	1	86	male	High Grade	Stage IV	Dead
TCGA-FD-A3B6-01A	1005	1	75	male	High Grade	Stage II	Dead
TCGA-FD-A3B7-01A	122	1	66	male	High Grade	Stage III	Dead
TCGA-FD-A3B8-01A	384	0	56	male	High Grade	Stage II	Alive
TCGA-FD-A3N5-01A	685	1	69	male	High Grade	Stage II	Dead
TCGA-FD-A3N6-01A	851	0	43	female	High Grade	Stage II	Alive
TCGA-FD-A3NA-01A	1845	0	60	male	High Grade	Stage II	Alive
TCGA-FD-A3SJ-01A	739	1	59	male	High Grade	Stage IV	Dead
TCGA-FD-A3SL-01A	712	1	60	male	High Grade	Stage IV	Dead
TCGA-FD-A3SM-01A	547	1	70	male	High Grade	Stage IV	Dead
TCGA-FD-A3SN-01A	887	0	79	male	High Grade	Stage III	Alive
TCGA-FD-A3SO-01A	168	1	68	male	High Grade	Stage IV	Dead
TCGA-FD-A3SP-01A	783	0	60	male	High Grade	Stage III	Alive
TCGA-FD-A3SQ-01A	1423	1	62	male	High Grade	Stage IV	Dead
TCGA-FD-A3SR-01A	602	1	68	male	High Grade	Stage IV	Dead
TCGA-FD-A3SS-01A	391	1	66	male	High Grade	Stage IV	Dead
TCGA-FD-A43N-01A	699	0	76	male	High Grade	Stage III	Alive
TCGA-FD-A43P-01A	832	0	74	male	High Grade	Stage II	Alive
TCGA-FD-A43S-01A	455	0	71	female	High Grade	Stage III	Alive
TCGA-FD-A43U-01A	636	0	70	male	High Grade	Stage IV	Alive
TCGA-FD-A43X-01A	110	0	84	male	High Grade	Stage II	Alive
TCGA-FD-A43Y-01A	474	1	65	male	High Grade	Stage III	Dead
TCGA-FD-A5BR-01A	813	0	57	male	High Grade	Stage II	Alive
TCGA-FD-A5BS-01A	1639	0	68	male	High Grade	Stage III	Alive
TCGA-FD-A5BT-01A	328	1	84	male	High Grade	Stage III	Dead
TCGA-FD-A5BU-01A	588	0	76	female	High Grade	Stage II	Alive
TCGA-FD-A5BV-01A	163	1	47	female	High Grade	Stage III	Dead
TCGA-FD-A5BX-01A	173	1	82	male	High Grade	Stage IV	Dead
TCGA-FD-A5BY-01A	251	0	63	female	High Grade	Stage III	Alive
TCGA-FD-A5BZ-01A	835	1	77	female	High Grade	Stage IV	Dead
TCGA-FD-A5C0-01A	550	1	61	male	High Grade	Stage IV	Dead
TCGA-FD-A5C1-01A	1792	0	61	female	High Grade	Stage III	Alive
TCGA-FD-A62N-01A	82	0	69	male	High Grade	Stage III	Alive
TCGA-FD-A62O-01A	216	1	74	male	High Grade	Stage IV	Dead
TCGA-FD-A62P-01A	191	1	76	male	High Grade	Stage II	Dead
TCGA-FD-A62S-01A	406	1	60	female	High Grade	Stage III	Dead
TCGA-FD-A6TA-01A	1912	0	58	male	High Grade	Stage IV	Alive
TCGA-FD-A6TB-01A	572	0	82	male	High Grade	Stage III	Alive
TCGA-FD-A6TC-01A	187	0	79	female	High Grade	Stage III	Alive
TCGA-FD-A6TD-01A	386	1	77	male	High Grade	Stage III	Dead
TCGA-FD-A6TE-01A	376	0	54	male	High Grade	Stage IV	Alive
TCGA-FD-A6TF-01A	69	1	80	female	High Grade	Stage IV	Dead
TCGA-FD-A6TG-01A	93	1	73	male	High Grade	Stage IV	Dead
TCGA-FD-A6TH-01A	131	1	63	male	High Grade	Stage IV	Dead
TCGA-FD-A6TI-01A	294	1	73	male	High Grade	Stage IV	Dead
TCGA-FD-A6TK-01A	330	0	60	male	High Grade	Stage III	Alive
TCGA-FJ-A3Z7-01A	945	0	76	male	High Grade	Stage IV	Alive
TCGA-FJ-A3ZE-01A	324	1	65	male	High Grade	Stage IV	Dead
TCGA-FJ-A3ZF-01A	524	0	73	male	High Grade	Stage III	Alive
TCGA-FJ-A871-01A	272	1	49	male	High Grade	Stage III	Dead
TCGA-FT-A3EE-01A	99	1	80	female	High Grade	Stage III	Dead
TCGA-FT-A61P-01A	337	0	76	male	High Grade	Stage IV	Alive
TCGA-G2-A2EC-01A	696	1	58	female	High Grade	Stage II	Dead
TCGA-G2-A2EF-01A	1884	0	50	male	High Grade	Stage II	Alive
TCGA-G2-A2EJ-01A	1460	0	56	female	High Grade	Stage II	Alive
TCGA-G2-A2EK-01A	485	0	57	male	High Grade	Stage II	Alive
TCGA-G2-A2EL-01A	819	1	77	male	High Grade	Stage II	Dead
TCGA-G2-A2EO-01A	1804	1	69	male	High Grade	Stage III	Dead
TCGA-G2-A2ES-01A	1004	1	85	male	High Grade	Stage II	Dead
TCGA-G2-A3IB-01A	220	1	66	male	High Grade	Stage II	Dead
TCGA-G2-A3IE-01A	612	1	51	male	High Grade	Stage II	Dead
TCGA-G2-A3VY-01A	536	0	66	male	High Grade	Stage II	Alive
TCGA-G2-AA3B-01A	2008	0	75	female	High Grade	Stage II	Alive
TCGA-G2-AA3C-01A	211	1	66	male	High Grade	Stage IV	Dead
TCGA-G2-AA3D-01A	2139	0	60	male	High Grade	Stage IV	Alive
TCGA-G2-AA3F-01A	893	0	77	male	High Grade	Stage IV	Alive
TCGA-GC-A3BM-01A	651	1	70	male	High Grade	Stage II	Dead
TCGA-GC-A3I6-01A	630	1	45	male	High Grade	Stage III	Dead
TCGA-GC-A3OO-01A	481	0	79	male	High Grade	Stage II	Alive
TCGA-GC-A3RB-01A	582	0	54	male	High Grade	Stage III	Alive
TCGA-GC-A3RC-01A	484	0	59	male	High Grade	Stage II	Alive
TCGA-GC-A3RD-01A	428	0	83	female	High Grade	Stage III	Alive
TCGA-GC-A3WC-01A	540	0	80	female	High Grade	Stage III	Alive
TCGA-GC-A3YS-01A	758	0	61	male	High Grade	Stage IV	Alive
TCGA-GD-A2C5-01A	812	0	53	female	High Grade	Stage IV	Alive
TCGA-GD-A3OP-01A	64	0	84	female	High Grade	Stage IV	Alive
TCGA-GD-A3OQ-01A	95	0	48	male	High Grade	Stage IV	Alive
TCGA-GD-A3OS-01A	638	0	54	female	High Grade	Stage II	Alive
TCGA-GD-A6C6-01A	67	0	64	male	High Grade	Stage III	Alive
TCGA-GD-A76B-01A	224	1	86	female	High Grade	Stage II	Dead
TCGA-GU-A42P-01A	332	1	72	male	High Grade	Stage IV	Dead
TCGA-GU-A42Q-01A	344	1	67	male	High Grade	Stage III	Dead
TCGA-GU-A42R-01A	577	1	68	male	High Grade	Stage IV	Dead
TCGA-GU-A762-01A	232	1	87	male	High Grade	Stage IV	Dead
TCGA-GU-A763-01A	997	0	72	male	High Grade	Stage III	Alive
TCGA-GU-A764-01A	610	0	66	male	High Grade	Stage II	Alive
TCGA-GU-A766-01A	480	0	62	male	High Grade	Stage II	Alive
TCGA-GU-A767-01A	144	1	81	male	High Grade	Stage IV	Dead
TCGA-GU-AATO-01A	324	1	75	male	High Grade	Stage IV	Dead
TCGA-GU-AATP-01A	1003	0	74	male	High Grade	Stage IV	Alive
TCGA-GU-AATQ-01A	213	1	68	male	High Grade	Stage III	Dead
TCGA-GV-A3JV-01A	434	1	66	male	High Grade	Stage IV	Dead
TCGA-GV-A3JW-01A	649	0	74	male	High Grade	Stage II	Alive
TCGA-GV-A3JX-01A	581	0	59	male	High Grade	Stage III	Alive
TCGA-GV-A3JZ-01A	603	0	55	male	High Grade	Stage IV	Alive
TCGA-GV-A3QF-01A	617	1	79	male	High Grade	Stage IV	Dead
TCGA-GV-A3QH-01A	258	1	67	male	High Grade	Stage II	Dead
TCGA-GV-A3QI-01A	1110	0	47	male	High Grade	Stage III	Alive
TCGA-GV-A3QK-01B	832	0	56	female	High Grade	Stage IV	Alive
TCGA-GV-A40E-01A	261	1	75	male	High Grade	Stage II	Dead
TCGA-GV-A40G-01A	580	0	77	male	High Grade	Stage II	Alive
TCGA-GV-A6ZA-01A	691	0	54	male	High Grade	Stage II	Alive
TCGA-H4-A2HO-01A	46	0	53	male	High Grade	Stage III	Alive
TCGA-H4-A2HQ-01A	590	0	64	female	High Grade	Stage IV	Alive
TCGA-HQ-A2OF-01A	1947	0	52	female	High Grade	Stage III	Alive
TCGA-HQ-A5ND-01A	274	1	78	male	High Grade	Stage IV	Dead
TCGA-HQ-A5NE-01A	370	1	57	male	High Grade	Stage III	Dead
TCGA-K4-A3WS-01A	761	0	66	male	High Grade	Stage III	Alive
TCGA-K4-A3WU-01B	105	0	87	male	High Grade	Stage III	Alive
TCGA-K4-A3WV-01A	646	0	77	female	High Grade	Stage II	Alive
TCGA-K4-A4AC-01A	278	1	83	male	High Grade	Stage II	Dead
TCGA-K4-A54R-01A	842	0	59	male	High Grade	Stage II	Alive
TCGA-K4-A5RH-01A	276	0	69	male	High Grade	Stage III	Alive
TCGA-K4-A5RI-01A	356	1	67	female	High Grade	Stage III	Dead
TCGA-K4-A5RJ-01A	539	0	75	male	High Grade	Stage II	Alive
TCGA-K4-A6FZ-01A	55	0	75	female	High Grade	Stage III	Alive
TCGA-K4-A6MB-01A	469	0	64	male	High Grade	Stage IV	Alive
TCGA-K4-AAQO-01A	359	0	56	male	High Grade	Stage III	Alive
TCGA-KQ-A41N-01A	1604	0	73	male	High Grade	Stage III	Alive
TCGA-KQ-A41O-01A	1538	0	84	male	High Grade	Stage IV	Alive
TCGA-KQ-A41P-01A	1094	0	76	male	High Grade	Stage IV	Alive
TCGA-KQ-A41Q-01A	361	0	89	male	High Grade	Stage III	Alive
TCGA-KQ-A41R-01A	1350	0	80	female	High Grade	Stage II	Alive
TCGA-KQ-A41S-01A	35	0	87	female	High Grade	Stage III	Alive
TCGA-LC-A66R-01A	466	0	78	male	High Grade	Stage IV	Alive
TCGA-LT-A5Z6-01A	474	0	56	male	High Grade	Stage II	Alive
TCGA-LT-A8JT-01A	641	0	69	female	High Grade	Stage II	Alive
TCGA-MV-A51V-01A	410	0	75	male	High Grade	Stage III	Alive
TCGA-PQ-A6FI-01A	372	0	70	male	High Grade	Stage II	Alive
TCGA-PQ-A6FN-01A	507	0	78	female	High Grade	Stage III	Alive
TCGA-R3-A69X-01A	433	0	70	male	High Grade	Stage III	Alive
TCGA-S5-A6DX-01A	56	1	83	male	High Grade	Stage IV	Dead
TCGA-S5-AA26-01A	503	0	46	male	High Grade	Stage III	Alive
TCGA-SY-A9G0-01A	1008	1	82	male	High Grade	Stage IV	Dead
TCGA-SY-A9G5-01A	1186	0	66	male	High Grade	Stage III	Alive
TCGA-UY-A78K-01A	536	1	60	male	High Grade	Stage IV	Dead
TCGA-UY-A78L-01A	1127	0	62	male	High Grade	Stage IV	Alive
TCGA-UY-A78M-01A	690	1	81	female	High Grade	Stage IV	Dead
TCGA-UY-A78N-01A	2641	1	80	male	High Grade	Stage IV	Dead
TCGA-UY-A78O-01A	2312	0	75	female	High Grade	Stage II	Alive
TCGA-UY-A78P-01A	2380	0	78	female	High Grade	Stage II	Alive
TCGA-UY-A8OB-01A	2109	0	63	male	High Grade	Stage IV	Alive
TCGA-UY-A8OD-01A	3432	0	68	female	High Grade	Stage II	Alive
TCGA-UY-A9PA-01A	1072	0	48	male	High Grade	Stage III	Alive
TCGA-UY-A9PB-01A	899	0	49	male	High Grade	Stage III	Alive
TCGA-UY-A9PD-01A	542	0	80	male	High Grade	Stage III	Alive
TCGA-UY-A9PE-01A	189	0	86	male	High Grade	Stage IV	Alive
TCGA-UY-A9PF-01A	117	0	77	male	High Grade	Stage IV	Alive
TCGA-UY-A9PH-01A	1561	0	73	male	High Grade	Stage II	Alive
TCGA-XF-A8HB-01A	1370	0	50	female	High Grade	Stage II	Alive
TCGA-XF-A8HC-01A	200	1	79	male	High Grade	Stage IV	Dead
TCGA-XF-A8HD-01A	2964	0	77	male	High Grade	Stage III	Alive
TCGA-XF-A8HE-01A	3817	0	47	male	High Grade	Stage III	Alive
TCGA-XF-A8HF-01A	2954	1	80	male	High Grade	Stage III	Dead
TCGA-XF-A8HG-01A	467	1	69	male	High Grade	Stage III	Dead
TCGA-XF-A8HH-01A	57	1	61	female	High Grade	Stage IV	Dead
TCGA-XF-A8HI-01A	544	1	57	female	High Grade	Stage IV	Dead
TCGA-XF-A9SH-01A	1971	1	65	female	High Grade	Stage II	Dead
TCGA-XF-A9SI-01A	2423	0	73	female	High Grade	Stage II	Alive
TCGA-XF-A9SJ-01A	98	1	83	male	High Grade	Stage IV	Dead
TCGA-XF-A9SK-01A	486	1	65	male	High Grade	Stage IV	Dead
TCGA-XF-A9SL-01A	2020	1	69	male	High Grade	Stage IV	Dead
TCGA-XF-A9SM-01A	1048	0	76	male	High Grade	Stage III	Alive
TCGA-XF-A9SP-01A	454	1	59	male	High Grade	Stage III	Dead
TCGA-XF-A9ST-01A	128	1	68	male	High Grade	Stage III	Dead
TCGA-XF-A9SU-01A	182	1	74	female	High Grade	Stage IV	Dead
TCGA-XF-A9SV-01A	388	1	82	male	High Grade	Stage IV	Dead
TCGA-XF-A9SW-01A	362	1	85	male	High Grade	Stage IV	Dead
TCGA-XF-A9SX-01A	719	1	63	female	High Grade	Stage IV	Dead
TCGA-XF-A9SY-01A	640	0	60	female	High Grade	Stage IV	Alive
TCGA-XF-A9SZ-01A	859	1	79	male	High Grade	Stage IV	Dead
TCGA-XF-A9T0-01A	799	0	68	male	High Grade	Stage III	Alive
TCGA-XF-A9T2-01A	575	1	54	male	High Grade	Stage III	Dead
TCGA-XF-A9T3-01A	68	0	69	female	High Grade	Stage IV	Alive
TCGA-XF-A9T4-01A	495	1	48	male	High Grade	Stage IV	Dead
TCGA-XF-A9T5-01A	2027	0	78	female	High Grade	Stage IV	Alive
TCGA-XF-A9T6-01A	64	0	88	female	High Grade	Stage III	Alive
TCGA-XF-A9T8-01A	418	1	64	male	High Grade	Stage III	Dead
TCGA-XF-AAME-01A	2828	1	64	female	High Grade	Stage II	Dead
TCGA-XF-AAMG-01A	3364	0	49	male	High Grade	Stage III	Alive
TCGA-XF-AAMH-01A	344	1	80	male	High Grade	Stage IV	Dead
TCGA-XF-AAMJ-01A	1670	1	70	male	High Grade	Stage III	Dead
TCGA-XF-AAML-01A	232	1	75	male	High Grade	Stage II	Dead
TCGA-XF-AAMQ-01A	2177	0	59	female	High Grade	Stage II	Alive
TCGA-XF-AAMR-01A	2790	0	48	male	High Grade	Stage III	Alive
TCGA-XF-AAMT-01A	90	1	75	female	High Grade	Stage IV	Dead
TCGA-XF-AAMW-01A	253	1	79	female	High Grade	Stage IV	Dead
TCGA-XF-AAMX-01A	206	1	87	female	High Grade	Stage III	Dead
TCGA-XF-AAMY-01A	3011	0	78	male	High Grade	Stage III	Alive
TCGA-XF-AAMZ-01A	1348	1	81	female	High Grade	Stage IV	Dead
TCGA-XF-AAN0-01A	1718	1	68	male	High Grade	Stage IV	Dead
TCGA-XF-AAN1-01A	941	1	75	female	High Grade	Stage III	Dead
TCGA-XF-AAN2-01A	1869	1	73	male	High Grade	Stage II	Dead
TCGA-XF-AAN3-01A	2625	0	76	male	High Grade	Stage IV	Alive
TCGA-XF-AAN4-01A	823	1	77	female	High Grade	Stage III	Dead
TCGA-XF-AAN5-01A	2293	0	61	female	High Grade	Stage III	Alive
TCGA-XF-AAN7-01A	565	1	60	male	High Grade	Stage IV	Dead
TCGA-XF-AAN8-01A	118	1	74	female	High Grade	Stage III	Dead
TCGA-YC-A89H-01A	573	0	78	female	High Grade	Stage II	Alive
TCGA-YC-A8S6-01A	293	0	71	male	High Grade	Stage II	Alive
TCGA-YF-AA3L-01A	364	0	47	female	High Grade	Stage II	Alive
TCGA-YF-AA3M-01A	415	0	57	male	High Grade	Stage II	Alive
TCGA-ZF-A9R0-01A	680	1	82	male	High Grade	Stage III	Dead
TCGA-ZF-A9R1-01A	773	0	81	male	High Grade	Stage IV	Alive
TCGA-ZF-A9R2-01A	642	0	75	male	High Grade	Stage II	Alive
TCGA-ZF-A9R3-01A	949	1	53	female	High Grade	Stage II	Dead
TCGA-ZF-A9R4-01A	921	0	83	male	High Grade	Stage II	Alive
TCGA-ZF-A9R5-01A	1090	0	59	male	High Grade	Stage III	Alive
TCGA-ZF-A9R7-01A	665	0	76	female	High Grade	Stage II	Alive
TCGA-ZF-A9R9-01A	864	1	58	male	High Grade	Stage IV	Dead
TCGA-ZF-A9RC-01A	2868	0	77	male	High Grade	Stage III	Alive
TCGA-ZF-A9RD-01A	408	1	75	female	High Grade	Stage IV	Dead
TCGA-ZF-A9RE-01A	106	1	78	female	High Grade	Stage II	Dead
TCGA-ZF-A9RF-01A	1949	0	74	male	High Grade	Stage II	Alive
TCGA-ZF-A9RL-01A	2703	0	61	male	High Grade	Stage II	Alive
TCGA-ZF-A9RM-01A	1455	0	70	male	High Grade	Stage II	Alive
TCGA-ZF-A9RN-01A	615	1	67	female	High Grade	Stage III	Dead
TCGA-ZF-AA4N-01A	88	1	74	male	High Grade	Stage II	Dead
TCGA-ZF-AA4R-01A	1036	1	67	male	High Grade	Stage IV	Dead
TCGA-ZF-AA4T-01A	599	1	65	male	High Grade	Stage IV	Dead
TCGA-ZF-AA4U-01A	262	1	70	male	High Grade	Stage III	Dead
TCGA-ZF-AA4V-01A	1806	0	66	male	High Grade	Stage III	Alive
TCGA-ZF-AA4W-01A	1830	0	56	male	High Grade	Stage III	Alive
TCGA-ZF-AA4X-01A	2044	0	56	male	High Grade	Stage II	Alive
TCGA-ZF-AA51-01A	1714	0	69	female	High Grade	Stage II	Alive
TCGA-ZF-AA52-01A	1077	1	70	male	High Grade	Stage III	Dead
TCGA-ZF-AA53-01A	1761	0	60	male	High Grade	Stage II	Alive
TCGA-ZF-AA54-01A	590	1	71	male	High Grade	Stage III	Dead
TCGA-ZF-AA56-01A	259	1	79	female	High Grade	Stage III	Dead
TCGA-ZF-AA58-01A	1649	0	61	female	High Grade	Stage IV	Alive
TCGA-ZF-AA5H-01A	897	0	60	female	High Grade	Stage IV	Alive
TCGA-ZF-AA5N-01A	168	1	62	female	High Grade	Stage IV	Dead
TCGA-ZF-AA5P-01A	372	0	65	male	High Grade	Stage IV	Alive

## Sheet: Clinical of GSE13507
accession	title	platform	source	organism	biological source	molecule	strain	genotype	age	cre-driver	cell type	indexes	SEX	AGE	invasiveness	intravesical therapy	systemic chemo	stage	grade	recurrence	progression	overall survival	cancer specific survival	survival month
GSM340537	Control C010	GPL6102	Normal bladder mucosae	Homo sapiens	normal bladder mucosae	total RNA
GSM340538	Control C017	GPL6102	Normal bladder mucosae	Homo sapiens	normal bladder mucosae	total RNA
GSM340539	Control C029	GPL6102	Normal bladder mucosae	Homo sapiens	normal bladder mucosae	total RNA
GSM340540	Control C030	GPL6102	Normal bladder mucosae	Homo sapiens	normal bladder mucosae	total RNA
GSM340541	Control C040	GPL6102	Normal bladder mucosae	Homo sapiens	normal bladder mucosae	total RNA
GSM340542	Vav-Control MPP RNA-seq 1	GPL6102	Multipotent Progenitor Cells (MPPs)	Homo sapiens		total RNA	C57BL/6	Wild-type	8-weeks	Vav-CRE	Multipotent Progenitor Cells (MPPs)	CGTCGCT
GSM340543	Control C044	GPL6102	Normal bladder mucosae	Homo sapiens	normal bladder mucosae	total RNA
GSM340544	Control C045	GPL6102	Normal bladder mucosae	Homo sapiens	normal bladder mucosae	total RNA
GSM340545	Control C051	GPL6102	Normal bladder mucosae	Homo sapiens	normal bladder mucosae	total RNA
GSM340546	Control C072	GPL6102	Normal bladder mucosae	Homo sapiens	normal bladder mucosae	total RNA
GSM340547	Surrounding BS017	GPL6102	Bladder mucosae surrounding cancer	Homo sapiens	bladder mucosae surrounding cancer	total RNA
GSM340548	Surrounding BS038	GPL6102	Bladder mucosae surrounding cancer	Homo sapiens	bladder mucosae surrounding cancer	total RNA
GSM340549	Surrounding BS039	GPL6102	Bladder mucosae surrounding cancer	Homo sapiens	bladder mucosae surrounding cancer	total RNA
GSM340550	Surrounding BS040	GPL6102	Bladder mucosae surrounding cancer	Homo sapiens	bladder mucosae surrounding cancer	total RNA
GSM340551	Surrounding BS041	GPL6102	Bladder mucosae surrounding cancer	Homo sapiens	bladder mucosae surrounding cancer	total RNA
GSM340552	Surrounding BS044	GPL6102	Bladder mucosae surrounding cancer	Homo sapiens	bladder mucosae surrounding cancer	total RNA
GSM340553	Surrounding BS045	GPL6102	Bladder mucosae surrounding cancer	Homo sapiens	bladder mucosae surrounding cancer	total RNA
GSM340554	Surrounding BS047	GPL6102	Bladder mucosae surrounding cancer	Homo sapiens	bladder mucosae surrounding cancer	total RNA
GSM340555	Surrounding BS048	GPL6102	Bladder mucosae surrounding cancer	Homo sapiens	bladder mucosae surrounding cancer	total RNA
GSM340556	Surrounding BS051	GPL6102	Bladder mucosae surrounding cancer	Homo sapiens	bladder mucosae surrounding cancer	total RNA
GSM340557	Surrounding BS052	GPL6102	Bladder mucosae surrounding cancer	Homo sapiens	bladder mucosae surrounding cancer	total RNA
GSM340558	Surrounding BS054	GPL6102	Bladder mucosae surrounding cancer	Homo sapiens	bladder mucosae surrounding cancer	total RNA
GSM340559	Surrounding BS059	GPL6102	Bladder mucosae surrounding cancer	Homo sapiens	bladder mucosae surrounding cancer	total RNA
GSM340560	Surrounding BS063	GPL6102	Bladder mucosae surrounding cancer	Homo sapiens	bladder mucosae surrounding cancer	total RNA
GSM340561	Surrounding BS065	GPL6102	Bladder mucosae surrounding cancer	Homo sapiens	bladder mucosae surrounding cancer	total RNA
GSM340562	Surrounding BS068	GPL6102	Bladder mucosae surrounding cancer	Homo sapiens	bladder mucosae surrounding cancer	total RNA
GSM340563	Surrounding BS073	GPL6102	Bladder mucosae surrounding cancer	Homo sapiens	bladder mucosae surrounding cancer	total RNA
GSM340564	Surrounding BS075	GPL6102	Bladder mucosae surrounding cancer	Homo sapiens	bladder mucosae surrounding cancer	total RNA
GSM340565	Surrounding BS080	GPL6102	Bladder mucosae surrounding cancer	Homo sapiens	bladder mucosae surrounding cancer	total RNA
GSM340566	Surrounding BS081	GPL6102	Bladder mucosae surrounding cancer	Homo sapiens	bladder mucosae surrounding cancer	total RNA
GSM340567	Surrounding BS083	GPL6102	Bladder mucosae surrounding cancer	Homo sapiens	bladder mucosae surrounding cancer	total RNA
GSM340568	Surrounding BS084	GPL6102	Bladder mucosae surrounding cancer	Homo sapiens	bladder mucosae surrounding cancer	total RNA
GSM340569	Surrounding BS085	GPL6102	Bladder mucosae surrounding cancer	Homo sapiens	bladder mucosae surrounding cancer	total RNA
GSM340570	Surrounding BS086	GPL6102	Bladder mucosae surrounding cancer	Homo sapiens	bladder mucosae surrounding cancer	total RNA
GSM340571	Surrounding BS087	GPL6102	Bladder mucosae surrounding cancer	Homo sapiens	bladder mucosae surrounding cancer	total RNA
GSM340572	Surrounding BS089	GPL6102	Bladder mucosae surrounding cancer	Homo sapiens	bladder mucosae surrounding cancer	total RNA
GSM340573	Surrounding BS091	GPL6102	Bladder mucosae surrounding cancer	Homo sapiens	bladder mucosae surrounding cancer	total RNA
GSM340574	Surrounding BS093	GPL6102	Bladder mucosae surrounding cancer	Homo sapiens	bladder mucosae surrounding cancer	total RNA
GSM340575	Surrounding BS095	GPL6102	Bladder mucosae surrounding cancer	Homo sapiens	bladder mucosae surrounding cancer	total RNA
GSM340576	Surrounding BS097	GPL6102	Bladder mucosae surrounding cancer	Homo sapiens	bladder mucosae surrounding cancer	total RNA
GSM340577	Surrounding BS100	GPL6102	Bladder mucosae surrounding cancer	Homo sapiens	bladder mucosae surrounding cancer	total RNA
GSM340578	Surrounding BS101	GPL6102	Bladder mucosae surrounding cancer	Homo sapiens	bladder mucosae surrounding cancer	total RNA
GSM340579	Surrounding BS104	GPL6102	Bladder mucosae surrounding cancer	Homo sapiens	bladder mucosae surrounding cancer	total RNA
GSM340580	Surrounding BS106	GPL6102	Bladder mucosae surrounding cancer	Homo sapiens	bladder mucosae surrounding cancer	total RNA
GSM340581	Surrounding BS107	GPL6102	Bladder mucosae surrounding cancer	Homo sapiens	bladder mucosae surrounding cancer	total RNA
GSM340582	Surrounding BS108	GPL6102	Bladder mucosae surrounding cancer	Homo sapiens	bladder mucosae surrounding cancer	total RNA
GSM340583	Surrounding BS109	GPL6102	Bladder mucosae surrounding cancer	Homo sapiens	bladder mucosae surrounding cancer	total RNA
GSM340584	Surrounding BS111	GPL6102	Bladder mucosae surrounding cancer	Homo sapiens	bladder mucosae surrounding cancer	total RNA
GSM340585	Surrounding BS113	GPL6102	Bladder mucosae surrounding cancer	Homo sapiens	bladder mucosae surrounding cancer	total RNA
GSM340586	Surrounding BS115	GPL6102	Bladder mucosae surrounding cancer	Homo sapiens	bladder mucosae surrounding cancer	total RNA
GSM340587	Surrounding BS117	GPL6102	Bladder mucosae surrounding cancer	Homo sapiens	bladder mucosae surrounding cancer	total RNA
GSM340588	Surrounding BS119	GPL6102	Bladder mucosae surrounding cancer	Homo sapiens	bladder mucosae surrounding cancer	total RNA
GSM340589	Surrounding BS123	GPL6102	Bladder mucosae surrounding cancer	Homo sapiens	bladder mucosae surrounding cancer	total RNA
GSM340590	Surrounding BS125	GPL6102	Bladder mucosae surrounding cancer	Homo sapiens	bladder mucosae surrounding cancer	total RNA
GSM340591	Surrounding BS126	GPL6102	Bladder mucosae surrounding cancer	Homo sapiens	bladder mucosae surrounding cancer	total RNA
GSM340592	Surrounding BS129	GPL6102	Bladder mucosae surrounding cancer	Homo sapiens	bladder mucosae surrounding cancer	total RNA
GSM340593	Surrounding BS130	GPL6102	Bladder mucosae surrounding cancer	Homo sapiens	bladder mucosae surrounding cancer	total RNA
GSM340594	Surrounding BS131	GPL6102	Bladder mucosae surrounding cancer	Homo sapiens	bladder mucosae surrounding cancer	total RNA
GSM340595	Surrounding BS134	GPL6102	Bladder mucosae surrounding cancer	Homo sapiens	bladder mucosae surrounding cancer	total RNA
GSM340596	Surrounding BS135	GPL6102	Bladder mucosae surrounding cancer	Homo sapiens	bladder mucosae surrounding cancer	total RNA
GSM340597	Surrounding BS142	GPL6102	Bladder mucosae surrounding cancer	Homo sapiens	bladder mucosae surrounding cancer	total RNA
GSM340598	Surrounding BS150	GPL6102	Bladder mucosae surrounding cancer	Homo sapiens	bladder mucosae surrounding cancer	total RNA
GSM340599	Surrounding BS168	GPL6102	Bladder mucosae surrounding cancer	Homo sapiens	bladder mucosae surrounding cancer	total RNA
GSM340600	Surrounding BS169	GPL6102	Bladder mucosae surrounding cancer	Homo sapiens	bladder mucosae surrounding cancer	total RNA
GSM340601	Surrounding BS170	GPL6102	Bladder mucosae surrounding cancer	Homo sapiens	bladder mucosae surrounding cancer	total RNA
GSM340602	Surrounding BS301	GPL6102	Bladder mucosae surrounding cancer	Homo sapiens	bladder mucosae surrounding cancer	total RNA
GSM340603	Surrounding BS302	GPL6102	Bladder mucosae surrounding cancer	Homo sapiens	bladder mucosae surrounding cancer	total RNA
GSM340604	Surrounding BS303	GPL6102	Bladder mucosae surrounding cancer	Homo sapiens	bladder mucosae surrounding cancer	total RNA
GSM340605	Primary bladder cancer BT001	GPL6102	Primary bladder cancer	Homo sapiens	primary bladder cancer	total RNA							M	78	non-muscle invasive	Yes	No	T1N0M0	low	Yes	No	death	survival	18.17
GSM340606	Primary bladder cancer BT002	GPL6102	Primary bladder cancer	Homo sapiens	primary bladder cancer	total RNA							F	54	non-muscle invasive	No	No	TaN0M0	low	No	No	survival	survival	136.97
GSM340607	Primary bladder cancer BT003	GPL6102	Primary bladder cancer	Homo sapiens	primary bladder cancer	total RNA							M	37	non-muscle invasive	No	No	TaN0M0	low	No	No	survival	survival	136.37
GSM340608	Primary bladder cancer BT004	GPL6102	Primary bladder cancer	Homo sapiens	primary bladder cancer	total RNA							M	72	non-muscle invasive	Yes	No	T1N0M0	low	No	No	death	survival	26.9
GSM340609	Primary bladder cancer BT005	GPL6102	Primary bladder cancer	Homo sapiens	primary bladder cancer	total RNA							M	68	non-muscle invasive	No	No	T1N0M0	low	No	No	death	survival	87.07
GSM340610	Primary bladder cancer BT006	GPL6102	Primary bladder cancer	Homo sapiens	primary bladder cancer	total RNA							M	80	non-muscle invasive	No	No	T1N0M0	low	No	No	death	survival	15.3
GSM340611	Primary bladder cancer BT007	GPL6102	Primary bladder cancer	Homo sapiens	primary bladder cancer	total RNA							M	67	non-muscle invasive	Yes	No	T1N0M0	low	Yes	Yes	death	death	18.53
GSM340612	Primary bladder cancer BT008	GPL6102	Primary bladder cancer	Homo sapiens	primary bladder cancer	total RNA							M	58	muscle invasive		Yes	T2N0M0	low		No	survival	survival	129.93
GSM340613	Primary bladder cancer BT009	GPL6102	Primary bladder cancer	Homo sapiens	primary bladder cancer	total RNA							F	77	muscle invasive		No	T3bN0M0	high		No	death	death	12.57
GSM340614	Primary bladder cancer BT010	GPL6102	Primary bladder cancer	Homo sapiens	primary bladder cancer	total RNA							M	64	muscle invasive		Yes	T3aN0M0	low		No	survival	survival	128.97
GSM340615	Primary bladder cancer BT011	GPL6102	Primary bladder cancer	Homo sapiens	primary bladder cancer	total RNA							M	63	non-muscle invasive	No	No	TaN0M0	low	No	No	survival	survival	125.03
GSM340616	Primary bladder cancer BT012	GPL6102	Primary bladder cancer	Homo sapiens	primary bladder cancer	total RNA							F	56	non-muscle invasive	No	No	TaN0M0	low	No	No	survival	survival	125.27
GSM340617	Primary bladder cancer BT013	GPL6102	Primary bladder cancer	Homo sapiens	primary bladder cancer	total RNA							M	69	non-muscle invasive	No	No	T1N0M0	low	No	No	survival	survival	130.6
GSM340618	Primary bladder cancer BT014	GPL6102	Primary bladder cancer	Homo sapiens	primary bladder cancer	total RNA							M	75	muscle invasive		Yes	T4N0M0	low		No	death	death	1.03
GSM340619	Primary bladder cancer BT015	GPL6102	Primary bladder cancer	Homo sapiens	primary bladder cancer	total RNA							M	76	non-muscle invasive	Yes	No	T1N0M0	low	No	No	survival	survival	129.67
GSM340620	Primary bladder cancer BT016	GPL6102	Primary bladder cancer	Homo sapiens	primary bladder cancer	total RNA							M	61	muscle invasive		Yes	T3aN2M1	low		No	death	death	16.67
GSM340621	Primary bladder cancer BT017	GPL6102	Primary bladder cancer	Homo sapiens	primary bladder cancer	total RNA							M	45	non-muscle invasive	Yes	No	T1N0M0	low	Yes	No	survival	survival	127.63
GSM340622	Primary bladder cancer BT018	GPL6102	Primary bladder cancer	Homo sapiens	primary bladder cancer	total RNA							M	58	non-muscle invasive	No	No	TaN0M0	low	Yes	Yes	survival	survival	124.53
GSM340623	Primary bladder cancer BT019	GPL6102	Primary bladder cancer	Homo sapiens	primary bladder cancer	total RNA							F	71	muscle invasive		No	T4N2M1	high		No	death	death	3.13
GSM340624	Primary bladder cancer BT020	GPL6102	Primary bladder cancer	Homo sapiens	primary bladder cancer	total RNA							M	79	non-muscle invasive	No	No	T1N0M0	low	No	No	death	survival	65.93
GSM340625	Primary bladder cancer BT021	GPL6102	Primary bladder cancer	Homo sapiens	primary bladder cancer	total RNA							M	75	non-muscle invasive	No	No	T1N0M0	low	No	No	death	survival	3.23
GSM340626	Primary bladder cancer BT022	GPL6102	Primary bladder cancer	Homo sapiens	primary bladder cancer	total RNA							M	63	non-muscle invasive	No	No	T1N0M0	low	No	No	survival	survival	120.6
GSM340627	Primary bladder cancer BT023	GPL6102	Primary bladder cancer	Homo sapiens	primary bladder cancer	total RNA							F	68	non-muscle invasive	Yes	No	T1N0M0	low	Yes	No	death	survival	22.67
GSM340628	Primary bladder cancer BT024	GPL6102	Primary bladder cancer	Homo sapiens	primary bladder cancer	total RNA							M	56	muscle invasive		Yes	T3aN0M0	high		Yes	survival	survival	120.5
GSM340629	Primary bladder cancer BT025	GPL6102	Primary bladder cancer	Homo sapiens	primary bladder cancer	total RNA							M	82	non-muscle invasive	No	No	T1N0M0	low	No	No	death	survival	50.43
GSM340630	Primary bladder cancer BT026	GPL6102	Primary bladder cancer	Homo sapiens	primary bladder cancer	total RNA							M	38	muscle invasive		Yes	T2N0M0	low		Yes	death	death	66.3
GSM340631	Primary bladder cancer BT027	GPL6102	Primary bladder cancer	Homo sapiens	primary bladder cancer	total RNA							M	55	non-muscle invasive	No	No	TaN0M0	low	No	No	survival	survival	120.17
GSM340632	Primary bladder cancer BT028	GPL6102	Primary bladder cancer	Homo sapiens	primary bladder cancer	total RNA							M	53	non-muscle invasive	Yes	No	T1N0M0	low	Yes	No	survival	survival	120.6
GSM340633	Primary bladder cancer BT029	GPL6102	Primary bladder cancer	Homo sapiens	primary bladder cancer	total RNA							M	64	muscle invasive		Yes	T3bN0M0	high		Yes	death	death	14.57
GSM340634	Primary bladder cancer BT030	GPL6102	Primary bladder cancer	Homo sapiens	primary bladder cancer	total RNA							M	68	muscle invasive		Yes	T3aN0M0	high		No	survival	survival	115.83
GSM340635	Primary bladder cancer BT031	GPL6102	Primary bladder cancer	Homo sapiens	primary bladder cancer	total RNA							M	65	non-muscle invasive	No	No	TaN0M0	low	Yes	No	survival	survival	106.6
GSM340636	Primary bladder cancer BT032	GPL6102	Primary bladder cancer	Homo sapiens	primary bladder cancer	total RNA							F	65	muscle invasive		Yes	T2N0M0	high		No	survival	survival	121.2
GSM340637	Primary bladder cancer BT033	GPL6102	Primary bladder cancer	Homo sapiens	primary bladder cancer	total RNA							M	74	non-muscle invasive	No	No	T1N0M0	low	No	No	death	survival	98
GSM340638	Primary bladder cancer BT034	GPL6102	Primary bladder cancer	Homo sapiens	primary bladder cancer	total RNA							M	67	non-muscle invasive	Yes	No	T1N0M0	low	Yes	Yes	death	death	67.03
GSM340639	Primary bladder cancer BT035	GPL6102	Primary bladder cancer	Homo sapiens	primary bladder cancer	total RNA							M	61	non-muscle invasive	No	No	TaN0M0	low	No	No	survival	survival	99.73
GSM340640	Primary bladder cancer BT036	GPL6102	Primary bladder cancer	Homo sapiens	primary bladder cancer	total RNA							M	78	non-muscle invasive	Yes	No	TaN0M0	low	Yes	Yes	death	survival	50.3
GSM340641	Primary bladder cancer BT037	GPL6102	Primary bladder cancer	Homo sapiens	primary bladder cancer	total RNA							M	52	non-muscle invasive	No	No	T1N0M0	high	No	No	survival	survival	98.23
GSM340642	Primary bladder cancer BT038	GPL6102	Primary bladder cancer	Homo sapiens	primary bladder cancer	total RNA							M	65	non-muscle invasive	Yes	No	T1N0M0	low	Yes	No	survival	survival	106.03
GSM340643	Primary bladder cancer BT039	GPL6102	Primary bladder cancer	Homo sapiens	primary bladder cancer	total RNA							M	69	non-muscle invasive	Yes	No	T1N0M0	low	No	No	survival	survival	95.3
GSM340644	Primary bladder cancer BT040	GPL6102	Primary bladder cancer	Homo sapiens	primary bladder cancer	total RNA							M	64	non-muscle invasive	No	No	TaN0M0	low	No	No	death	survival	80.43
GSM340645	Primary bladder cancer BT041	GPL6102	Primary bladder cancer	Homo sapiens	primary bladder cancer	total RNA							M	69	non-muscle invasive	Yes	Yes	T1N0M0	high	Yes	Yes	death	survival	35.7
GSM340646	Primary bladder cancer BT042	GPL6102	Primary bladder cancer	Homo sapiens	primary bladder cancer	total RNA							F	75	non-muscle invasive	Yes	No	T1N0M0	high	Yes	No	death	survival	51.77
GSM340647	Primary bladder cancer BT043	GPL6102	Primary bladder cancer	Homo sapiens	primary bladder cancer	total RNA							M	53	non-muscle invasive	No	No	T1N0M0	low	No	No	survival	survival	92.83
GSM340648	Primary bladder cancer BT044	GPL6102	Primary bladder cancer	Homo sapiens	primary bladder cancer	total RNA							M	58	muscle invasive		No	T2N0M0	low		No	survival	survival	90.73
GSM340649	Primary bladder cancer BT045	GPL6102	Primary bladder cancer	Homo sapiens	primary bladder cancer	total RNA							M	35	non-muscle invasive	No	No	T1N0M0	low	No	No	survival	survival	90.47
GSM340650	Primary bladder cancer BT046	GPL6102	Primary bladder cancer	Homo sapiens	primary bladder cancer	total RNA							M	43	non-muscle invasive	Yes	No	T1N0M0	low	No	No	survival	survival	86.07
GSM340651	Primary bladder cancer BT047	GPL6102	Primary bladder cancer	Homo sapiens	primary bladder cancer	total RNA							M	66	non-muscle invasive	Yes	No	T1N0M0	low	Yes	Yes	death	survival	134.97
GSM340652	Primary bladder cancer BT048	GPL6102	Primary bladder cancer	Homo sapiens	primary bladder cancer	total RNA							M	83	non-muscle invasive	No	No	T1N0M0	low	Yes	No	death	survival	65.93
GSM340653	Primary bladder cancer BT049	GPL6102	Primary bladder cancer	Homo sapiens	primary bladder cancer	total RNA							M	73	muscle invasive		No	T3bN0M0	high		Yes	death	death	25.83
GSM340654	Primary bladder cancer BT050	GPL6102	Primary bladder cancer	Homo sapiens	primary bladder cancer	total RNA							M	51	muscle invasive		Yes	T3bN2M0	high		No	death	death	10.27
GSM340655	Primary bladder cancer BT051	GPL6102	Primary bladder cancer	Homo sapiens	primary bladder cancer	total RNA							F	88	non-muscle invasive	Yes	No	T1N0M0	high	No	No	death	survival	85.43
GSM340656	Primary bladder cancer BT052	GPL6102	Primary bladder cancer	Homo sapiens	primary bladder cancer	total RNA							M	77	non-muscle invasive	No	No	T1N0M0	high	No	No	death	survival	3.17
GSM340657	Primary bladder cancer BT053	GPL6102	Primary bladder cancer	Homo sapiens	primary bladder cancer	total RNA							M	79	non-muscle invasive	Yes	No	T1N0M0	low	Yes	No	survival	survival	83.63
GSM340658	Primary bladder cancer BT054	GPL6102	Primary bladder cancer	Homo sapiens	primary bladder cancer	total RNA							M	79	non-muscle invasive	No	No	T1N0M0	low	No	No	survival	survival	83.63
GSM340659	Primary bladder cancer BT055	GPL6102	Primary bladder cancer	Homo sapiens	primary bladder cancer	total RNA							M	63	non-muscle invasive	Yes	No	T1N0M0	low	No	No	death	survival	70.93
GSM340660	Primary bladder cancer BT056	GPL6102	Primary bladder cancer	Homo sapiens	primary bladder cancer	total RNA							M	62	muscle invasive		No	T2N0M0	low		No	survival	survival	81.63
GSM340661	Primary bladder cancer BT057	GPL6102	Primary bladder cancer	Homo sapiens	primary bladder cancer	total RNA							M	67	non-muscle invasive	No	No	T1N0M0	low	Yes	No	survival	survival	80.2
GSM340662	Primary bladder cancer BT058	GPL6102	Primary bladder cancer	Homo sapiens	primary bladder cancer	total RNA							M	73	non-muscle invasive	No	No	T1N0M0	high	Yes	Yes	survival	survival	78.83
GSM340663	Primary bladder cancer BT059	GPL6102	Primary bladder cancer	Homo sapiens	primary bladder cancer	total RNA							M	79	non-muscle invasive	Yes	No	T1N0M0	high	No	No	survival	survival	78.73
GSM340664	Primary bladder cancer BT060	GPL6102	Primary bladder cancer	Homo sapiens	primary bladder cancer	total RNA							M	59	non-muscle invasive	Yes	No	TaN0M0	low	Yes	Yes	death	survival	70.73
GSM340665	Primary bladder cancer BT061	GPL6102	Primary bladder cancer	Homo sapiens	primary bladder cancer	total RNA							M	78	muscle invasive		No	T2N1M1	high		No	death	death	8.7
GSM340666	Primary bladder cancer BT062	GPL6102	Primary bladder cancer	Homo sapiens	primary bladder cancer	total RNA							M	59	non-muscle invasive	Yes	No	T1N0M0	low	Yes	Yes	survival	survival	75.33
GSM340667	Primary bladder cancer BT063	GPL6102	Primary bladder cancer	Homo sapiens	primary bladder cancer	total RNA							F	38	non-muscle invasive	Yes	No	T1N0M0	low	Yes	No	survival	survival	75.7
GSM340668	Primary bladder cancer BT064	GPL6102	Primary bladder cancer	Homo sapiens	primary bladder cancer	total RNA							M	49	non-muscle invasive	No	No	TaN0M0	low	No	No	survival	survival	75.13
GSM340669	Primary bladder cancer BT065	GPL6102	Primary bladder cancer	Homo sapiens	primary bladder cancer	total RNA							M	62	non-muscle invasive	No	No	T1N0M0	low	Yes	No	survival	survival	75.13
GSM340670	Primary bladder cancer BT066	GPL6102	Primary bladder cancer	Homo sapiens	primary bladder cancer	total RNA							M	61	non-muscle invasive	No	No	TaN0M0	low	No	No	survival	survival	74.17
GSM340671	Primary bladder cancer BT067	GPL6102	Primary bladder cancer	Homo sapiens	primary bladder cancer	total RNA							M	74	non-muscle invasive	Yes	No	T1N0M0	high	Yes	No	death	survival	16.23
GSM340672	Primary bladder cancer BT068	GPL6102	Primary bladder cancer	Homo sapiens	primary bladder cancer	total RNA							M	72	muscle invasive		No	T3bN0M0	high		Yes	death	death	15.1
GSM340673	Primary bladder cancer BT069	GPL6102	Primary bladder cancer	Homo sapiens	primary bladder cancer	total RNA							F	60	muscle invasive		Yes	T2N0M0	low		Yes	death	death	11.23
GSM340674	Primary bladder cancer BT070	GPL6102	Primary bladder cancer	Homo sapiens	primary bladder cancer	total RNA							M	60	muscle invasive		No	T2N0M0	high		No	survival	survival	69.43
GSM340675	Primary bladder cancer BT071	GPL6102	Primary bladder cancer	Homo sapiens	primary bladder cancer	total RNA							M	82	non-muscle invasive	No	No	T1N0M0	high	Yes	No	death	survival	25.03
GSM340676	Primary bladder cancer BT072	GPL6102	Primary bladder cancer	Homo sapiens	primary bladder cancer	total RNA							M	67	non-muscle invasive	No	No	TaN0M0	low	No	No	survival	survival	67.07
GSM340677	Primary bladder cancer BT073	GPL6102	Primary bladder cancer	Homo sapiens	primary bladder cancer	total RNA							M	64	muscle invasive		No	T2N0M0	high		No	survival	survival	65.23
GSM340678	Primary bladder cancer BT074	GPL6102	Primary bladder cancer	Homo sapiens	primary bladder cancer	total RNA							M	73	muscle invasive		No	T4N0M0	high		No	death	death	11.97
GSM340679	Primary bladder cancer BT075	GPL6102	Primary bladder cancer	Homo sapiens	primary bladder cancer	total RNA							M	67	non-muscle invasive	Yes	No	T1N0M0	low	No	No	survival	survival	62
GSM340680	Primary bladder cancer BT076	GPL6102	Primary bladder cancer	Homo sapiens	primary bladder cancer	total RNA							M	77	non-muscle invasive	No	No	T1N0M0	low	No	No	survival	survival	61.33
GSM340681	Primary bladder cancer BT077	GPL6102	Primary bladder cancer	Homo sapiens	primary bladder cancer	total RNA							M	66	non-muscle invasive	No	No	T1N0M0	high	No	No	survival	survival	60.9
GSM340682	Primary bladder cancer BT078	GPL6102	Primary bladder cancer	Homo sapiens	primary bladder cancer	total RNA							M	79	non-muscle invasive	Yes	No	T1N0M0	low	No	No	survival	survival	60.2
GSM340683	Primary bladder cancer BT079	GPL6102	Primary bladder cancer	Homo sapiens	primary bladder cancer	total RNA							M	48	non-muscle invasive	Yes	No	T1N0M0	low	No	No	survival	survival	59.6
GSM340684	Primary bladder cancer BT080	GPL6102	Primary bladder cancer	Homo sapiens	primary bladder cancer	total RNA							M	76	muscle invasive		Yes	T4N0M0	high		Yes	death	death	10.4
GSM340685	Primary bladder cancer BT081	GPL6102	Primary bladder cancer	Homo sapiens	primary bladder cancer	total RNA							M	66	non-muscle invasive	No	No	T1N0M0	low	No	No	death	survival	59.87
GSM340686	Primary bladder cancer BT082	GPL6102	Primary bladder cancer	Homo sapiens	primary bladder cancer	total RNA							M	67	non-muscle invasive	Yes	No	T1N0M0	low	Yes	No	survival	survival	59
GSM340687	Primary bladder cancer BT083	GPL6102	Primary bladder cancer	Homo sapiens	primary bladder cancer	total RNA							F	68	non-muscle invasive	Yes	No	T1N0M0	low	Yes	No	survival	survival	58.73
GSM340688	Primary bladder cancer BT084	GPL6102	Primary bladder cancer	Homo sapiens	primary bladder cancer	total RNA							M	67	non-muscle invasive	Yes	No	T1N0M0	low	No	No	death	survival	46.17
GSM340689	Primary bladder cancer BT085	GPL6102	Primary bladder cancer	Homo sapiens	primary bladder cancer	total RNA							F	80	non-muscle invasive	Yes	No	T1N0M0	low	No	No	survival	survival	58.43
GSM340690	Primary bladder cancer BT086	GPL6102	Primary bladder cancer	Homo sapiens	primary bladder cancer	total RNA							M	68	non-muscle invasive	No	No	T1N0M0	low	No	No	survival	survival	58.07
GSM340691	Primary bladder cancer BT087	GPL6102	Primary bladder cancer	Homo sapiens	primary bladder cancer	total RNA							F	32	non-muscle invasive	Yes	No	T1N0M0	low	Yes	No	survival	survival	57.63
GSM340692	Primary bladder cancer BT088	GPL6102	Primary bladder cancer	Homo sapiens	primary bladder cancer	total RNA							M	63	non-muscle invasive	No	No	T1N0M0	low	No	No	death	survival	36.3
GSM340693	Primary bladder cancer BT089	GPL6102	Primary bladder cancer	Homo sapiens	primary bladder cancer	total RNA							F	80	muscle invasive		No	T2N0M0	high		No	survival	survival	56.47
GSM340694	Primary bladder cancer BT090	GPL6102	Primary bladder cancer	Homo sapiens	primary bladder cancer	total RNA							M	67	muscle invasive		No	T2N0M0	high		No	survival	survival	55.5
GSM340695	Primary bladder cancer BT091	GPL6102	Primary bladder cancer	Homo sapiens	primary bladder cancer	total RNA							M	37	non-muscle invasive	No	No	T1N0M0	low	No	No	survival	survival	52.97
GSM340696	Primary bladder cancer BT092	GPL6102	Primary bladder cancer	Homo sapiens	primary bladder cancer	total RNA							M	71	muscle invasive		No	T3N1M0	high		Yes	death	death	11.5
GSM340697	Primary bladder cancer BT093	GPL6102	Primary bladder cancer	Homo sapiens	primary bladder cancer	total RNA							M	60	muscle invasive		No	T3N0M0	high		Yes	death	survival	17.87
GSM340698	Primary bladder cancer BT094	GPL6102	Primary bladder cancer	Homo sapiens	primary bladder cancer	total RNA							M	74	non-muscle invasive	Yes	No	T1N0M0	high	Yes	Yes	death	survival	28.53
GSM340699	Primary bladder cancer BT095	GPL6102	Primary bladder cancer	Homo sapiens	primary bladder cancer	total RNA							M	80	non-muscle invasive	No	No	T1N0M0	low	Yes	Yes	death	death	17.63
GSM340700	Primary bladder cancer BT096	GPL6102	Primary bladder cancer	Homo sapiens	primary bladder cancer	total RNA							M	85	muscle invasive		No	T2N0M0	high		Yes	death	death	15.4
GSM340701	Primary bladder cancer BT097	GPL6102	Primary bladder cancer	Homo sapiens	primary bladder cancer	total RNA							F	59	muscle invasive		Yes	T3bN0M0	high		No	survival	survival	48.43
GSM340702	Primary bladder cancer BT098	GPL6102	Primary bladder cancer	Homo sapiens	primary bladder cancer	total RNA							F	65	muscle invasive		Yes	T4N1M1	low		No	death	death	4.5
GSM340703	Primary bladder cancer BT099	GPL6102	Primary bladder cancer	Homo sapiens	primary bladder cancer	total RNA							M	57	non-muscle invasive	Yes	No	TaN0M0	low	Yes	No	survival	survival	47.5
GSM340704	Primary bladder cancer BT100	GPL6102	Primary bladder cancer	Homo sapiens	primary bladder cancer	total RNA							M	73	muscle invasive		No	T2N1M0	high		No	death	death	5.23
GSM340705	Primary bladder cancer BT101	GPL6102	Primary bladder cancer	Homo sapiens	primary bladder cancer	total RNA							M	66	muscle invasive		Yes	T3bN0M0	high		No	survival	survival	45.6
GSM340706	Primary bladder cancer BT102	GPL6102	Primary bladder cancer	Homo sapiens	primary bladder cancer	total RNA							M	66	muscle invasive		No	T2N0M0	high		No	survival	survival	45.13
GSM340707	Primary bladder cancer BT103	GPL6102	Primary bladder cancer	Homo sapiens	primary bladder cancer	total RNA							M	64	non-muscle invasive	Yes	No	TaN0M0	low	Yes	No	survival	survival	43.5
GSM340708	Primary bladder cancer BT104	GPL6102	Primary bladder cancer	Homo sapiens	primary bladder cancer	total RNA							M	68	non-muscle invasive	Yes	No	T1N0M0	high	No	No	survival	survival	44.1
GSM340709	Primary bladder cancer BT105	GPL6102	Primary bladder cancer	Homo sapiens	primary bladder cancer	total RNA							F	59	muscle invasive		No	T2N0M0	low		No	death	survival	5.93
GSM340710	Primary bladder cancer BT106	GPL6102	Primary bladder cancer	Homo sapiens	primary bladder cancer	total RNA							M	66	non-muscle invasive	No	No	T1N0M0	high	No	No	death	survival	31.53
GSM340711	Primary bladder cancer BT107	GPL6102	Primary bladder cancer	Homo sapiens	primary bladder cancer	total RNA							F	63	non-muscle invasive	Yes	No	T1N0M0	low	No	No	survival	survival	41.8
GSM340712	Primary bladder cancer BT108	GPL6102	Primary bladder cancer	Homo sapiens	primary bladder cancer	total RNA							M	79	muscle invasive		No	T2N2M0	high		No	death	death	6.5
GSM340713	Primary bladder cancer BT109	GPL6102	Primary bladder cancer	Homo sapiens	primary bladder cancer	total RNA							M	44	non-muscle invasive	Yes	No	T1N0M0	low	Yes	No	survival	survival	41.07
GSM340714	Primary bladder cancer BT110	GPL6102	Primary bladder cancer	Homo sapiens	primary bladder cancer	total RNA							M	66	muscle invasive		No	T2bN0M0	high		No	survival	survival	39.77
GSM340715	Primary bladder cancer BT111	GPL6102	Primary bladder cancer	Homo sapiens	primary bladder cancer	total RNA							M	61	muscle invasive		No	T2N0M0	low		No	survival	survival	38.97
GSM340716	Primary bladder cancer BT113	GPL6102	Primary bladder cancer	Homo sapiens	primary bladder cancer	total RNA							F	80	non-muscle invasive	Yes	No	T1N0M0	low	No	No	death	survival	31.97
GSM340717	Primary bladder cancer BT114	GPL6102	Primary bladder cancer	Homo sapiens	primary bladder cancer	total RNA							M	57	non-muscle invasive	Yes	No	T1N0M0	low	No	No	survival	survival	37.3
GSM340718	Primary bladder cancer BT115	GPL6102	Primary bladder cancer	Homo sapiens	primary bladder cancer	total RNA							M	55	muscle invasive		Yes	T2aN0M0	low		No	survival	survival	36.83
GSM340719	Primary bladder cancer BT116	GPL6102	Primary bladder cancer	Homo sapiens	primary bladder cancer	total RNA							M	52	non-muscle invasive	Yes	No	T1N0M0	low	No	No	survival	survival	36.57
GSM340720	Primary bladder cancer BT117	GPL6102	Primary bladder cancer	Homo sapiens	primary bladder cancer	total RNA							M	50	muscle invasive		No	T2aN0M0	high		Yes	survival	survival	28.1
GSM340721	Primary bladder cancer BT118	GPL6102	Primary bladder cancer	Homo sapiens	primary bladder cancer	total RNA							M	78	muscle invasive		No	T2N0M0	high		Yes	death	death	3.93
GSM340722	Primary bladder cancer BT119	GPL6102	Primary bladder cancer	Homo sapiens	primary bladder cancer	total RNA							F	71	non-muscle invasive	Yes	No	T1N0M0	low	No	No	death	survival	23.53
GSM340723	Primary bladder cancer BT120	GPL6102	Primary bladder cancer	Homo sapiens	primary bladder cancer	total RNA							F	81	muscle invasive		No	T3N0M0	high		Yes	death	death	15.1
GSM340724	Primary bladder cancer BT121	GPL6102	Primary bladder cancer	Homo sapiens	primary bladder cancer	total RNA							M	43	non-muscle invasive	Yes	No	TaN0M0	low	No	No	survival	survival	34.87
GSM340725	Primary bladder cancer BT122	GPL6102	Primary bladder cancer	Homo sapiens	primary bladder cancer	total RNA							M	80	muscle invasive		No	T3N1M0	high		No	survival	survival	34.23
GSM340726	Primary bladder cancer BT123	GPL6102	Primary bladder cancer	Homo sapiens	primary bladder cancer	total RNA							M	47	non-muscle invasive	No	No	TaN0M0	low	No	No	survival	survival	33.7
GSM340727	Primary bladder cancer BT124	GPL6102	Primary bladder cancer	Homo sapiens	primary bladder cancer	total RNA							M	71	muscle invasive		Yes	T4aN0M0	low		Yes	death	death	11.07
GSM340728	Primary bladder cancer BT125	GPL6102	Primary bladder cancer	Homo sapiens	primary bladder cancer	total RNA							F	73	muscle invasive		No	T3N0M0	high		Yes	death	death	5.77
GSM340729	Primary bladder cancer BT126	GPL6102	Primary bladder cancer	Homo sapiens	primary bladder cancer	total RNA							M	87	muscle invasive		No	T2N0M0	low		No	survival	survival	33.07
GSM340730	Primary bladder cancer BT127	GPL6102	Primary bladder cancer	Homo sapiens	primary bladder cancer	total RNA							M	67	non-muscle invasive	Yes	No	TaN0M0	low	No	No	survival	survival	32.87
GSM340731	Primary bladder cancer BT128	GPL6102	Primary bladder cancer	Homo sapiens	primary bladder cancer	total RNA							M	82	muscle invasive		No	T2N0M0	high		No	death	survival	9.23
GSM340732	Primary bladder cancer BT129	GPL6102	Primary bladder cancer	Homo sapiens	primary bladder cancer	total RNA							F	78	muscle invasive		No	T3N1M0	high		Yes	death	death	7.1
GSM340733	Primary bladder cancer BT130	GPL6102	Primary bladder cancer	Homo sapiens	primary bladder cancer	total RNA							M	60	muscle invasive		No	T2N0M0	low		No	death	survival	17.13
GSM340734	Primary bladder cancer BT131	GPL6102	Primary bladder cancer	Homo sapiens	primary bladder cancer	total RNA							M	63	non-muscle invasive	No	No	TaN0M0	low	No	No	death	survival	23.57
GSM340735	Primary bladder cancer BT132	GPL6102	Primary bladder cancer	Homo sapiens	primary bladder cancer	total RNA							M	72	non-muscle invasive	Yes	No	T1N0M0	low	Yes	No	survival	survival	30.7
GSM340736	Primary bladder cancer BT133	GPL6102	Primary bladder cancer	Homo sapiens	primary bladder cancer	total RNA							M	68	non-muscle invasive	Yes	No	T1N0M0	high	No	No	survival	survival	30.1
GSM340737	Primary bladder cancer BT134	GPL6102	Primary bladder cancer	Homo sapiens	primary bladder cancer	total RNA							M	64	non-muscle invasive	Yes	No	T1N0M0	low	Yes	No	survival	survival	29.73
GSM340738	Primary bladder cancer BT135	GPL6102	Primary bladder cancer	Homo sapiens	primary bladder cancer	total RNA							M	83	non-muscle invasive	No	No	T1N0M0	low	No	No	death	survival	15.43
GSM340739	Primary bladder cancer BT136	GPL6102	Primary bladder cancer	Homo sapiens	primary bladder cancer	total RNA							M	66	non-muscle invasive	No	No	T1N0M0	low	No	No	survival	survival	29.37
GSM340740	Primary bladder cancer BT137	GPL6102	Primary bladder cancer	Homo sapiens	primary bladder cancer	total RNA							M	68	non-muscle invasive	Yes	No	T1N0M0	low	No	No	death	survival	17.67
GSM340741	Primary bladder cancer BT138	GPL6102	Primary bladder cancer	Homo sapiens	primary bladder cancer	total RNA							M	63	non-muscle invasive	Yes	No	T1N0M0	low	No	No	survival	survival	28.47
GSM340742	Primary bladder cancer BT139	GPL6102	Primary bladder cancer	Homo sapiens	primary bladder cancer	total RNA							F	45	non-muscle invasive	Yes	No	T1N0M0	low	Yes	No	survival	survival	23.9
GSM340743	Primary bladder cancer BT140	GPL6102	Primary bladder cancer	Homo sapiens	primary bladder cancer	total RNA							M	84	non-muscle invasive	Yes	No	T1N0M0	low	No	No	survival	survival	23.57
GSM340744	Primary bladder cancer BT141	GPL6102	Primary bladder cancer	Homo sapiens	primary bladder cancer	total RNA							M	72	non-muscle invasive	Yes	No	T1N0M0	high	Yes	No	death	survival	13.93
GSM340745	Primary bladder cancer BT142	GPL6102	Primary bladder cancer	Homo sapiens	primary bladder cancer	total RNA							F	72	muscle invasive		No	TaN3M1	high		No	death	death	2.13
GSM340746	Primary bladder cancer BT143	GPL6102	Primary bladder cancer	Homo sapiens	primary bladder cancer	total RNA							M	66	muscle invasive		No	T2N0M0	high		No	survival	survival	22.27
GSM340747	Primary bladder cancer BT144	GPL6102	Primary bladder cancer	Homo sapiens	primary bladder cancer	total RNA							M	74	muscle invasive		Yes	T4N0M1	low		No	death	survival	6.87
GSM340748	Primary bladder cancer BT145	GPL6102	Primary bladder cancer	Homo sapiens	primary bladder cancer	total RNA							M	63	non-muscle invasive	No	No	T1N0M0	low	Yes	No	survival	survival	20.83
GSM340749	Primary bladder cancer BT146	GPL6102	Primary bladder cancer	Homo sapiens	primary bladder cancer	total RNA							M	58	non-muscle invasive	Yes	No	T1N0M0	low	No	No	survival	survival	21.63
GSM340750	Primary bladder cancer BT147	GPL6102	Primary bladder cancer	Homo sapiens	primary bladder cancer	total RNA							M	70	non-muscle invasive	No	No	TaN0M0	low	No	No	survival	survival	21.4
GSM340751	Primary bladder cancer BT148	GPL6102	Primary bladder cancer	Homo sapiens	primary bladder cancer	total RNA							M	40	non-muscle invasive	Yes	No	T1N0M0	low	No	No	survival	survival	57.87
GSM340752	Primary bladder cancer BT149	GPL6102	Primary bladder cancer	Homo sapiens	primary bladder cancer	total RNA							F	80	non-muscle invasive	No	No	T1N0M0	high	No	No	survival	survival	21.23
GSM340753	Primary bladder cancer BT150	GPL6102	Primary bladder cancer	Homo sapiens	primary bladder cancer	total RNA							F	62	non-muscle invasive	No	No	TaN0M0	low	No	No	survival	survival	21.23
GSM340754	Primary bladder cancer BT151	GPL6102	Primary bladder cancer	Homo sapiens	primary bladder cancer	total RNA							M	24	non-muscle invasive	Yes	No	T1N0M0	low	No	No	survival	survival	20.47
GSM340755	Primary bladder cancer BT152	GPL6102	Primary bladder cancer	Homo sapiens	primary bladder cancer	total RNA							M	45	non-muscle invasive	Yes	No	T1N0M0	high	No	No	survival	survival	20.4
GSM340756	Primary bladder cancer BT153	GPL6102	Primary bladder cancer	Homo sapiens	primary bladder cancer	total RNA							F	67	non-muscle invasive	Yes	No	TaN0M0	low	No	No	survival	survival	19
GSM340757	Primary bladder cancer BT154	GPL6102	Primary bladder cancer	Homo sapiens	primary bladder cancer	total RNA							M	65	muscle invasive		Yes	T2N0M0	high		Yes	survival	survival	79.3
GSM340758	Primary bladder cancer BT155	GPL6102	Primary bladder cancer	Homo sapiens	primary bladder cancer	total RNA							F	59	muscle invasive		Yes	T4N1M0	high		Yes	death	death	15.47
GSM340759	Primary bladder cancer BT156	GPL6102	Primary bladder cancer	Homo sapiens	primary bladder cancer	total RNA							M	64	muscle invasive		Yes	T2N1M1	high		No	death	death	26.43
GSM340760	Primary bladder cancer BT157	GPL6102	Primary bladder cancer	Homo sapiens	primary bladder cancer	total RNA							M	70	muscle invasive		Yes	T4N0M0	high		No	death	death	13.27
GSM340761	Primary bladder cancer BT158	GPL6102	Primary bladder cancer	Homo sapiens	primary bladder cancer	total RNA							M	66	muscle invasive		Yes	T3NxM0	high		Yes	death	death	6.4
GSM340762	Primary bladder cancer BT159	GPL6102	Primary bladder cancer	Homo sapiens	primary bladder cancer	total RNA							M	77	muscle invasive		No	T4aN0M0	high		No	death	death	10.67
GSM340763	Primary bladder cancer BT160	GPL6102	Primary bladder cancer	Homo sapiens	primary bladder cancer	total RNA							M	67	muscle invasive		Yes	T2N2M0	low		No	survival	survival	18.13
GSM340764	Primary bladder cancer BT161	GPL6102	Primary bladder cancer	Homo sapiens	primary bladder cancer	total RNA							M	51	muscle invasive		Yes	T3aN0M0	low		No	survival	survival	15.37
GSM340765	Primary bladder cancer BT162	GPL6102	Primary bladder cancer	Homo sapiens	primary bladder cancer	total RNA							M	42	muscle invasive		Yes	T4N2M0	high		No	survival	survival	11.8
GSM340766	Primary bladder cancer BT163	GPL6102	Primary bladder cancer	Homo sapiens	primary bladder cancer	total RNA							M	72	muscle invasive		No	T2N0M0	high		No	survival	survival	10.87
GSM340767	Primary bladder cancer BT164	GPL6102	Primary bladder cancer	Homo sapiens	primary bladder cancer	total RNA							F	70	muscle invasive		No	T2N0M0	low		Yes	survival	survival	10.03
GSM340768	Primary bladder cancer BT165	GPL6102	Primary bladder cancer	Homo sapiens	primary bladder cancer	total RNA							M	54	non-muscle invasive	No	No	T1N0M0	low	No	No	survival	survival	6.73
GSM340769	Primary bladder cancer BT166	GPL6102	Primary bladder cancer	Homo sapiens	primary bladder cancer	total RNA							M	62	muscle invasive		No	T2aN0M0	high		No	survival	survival	5.3
GSM340770	Recurrent bladder tumor BT034.1	GPL6102	Recurrent non-muscle invasive tumor	Homo sapiens	recurrent non-muscle invasive tumor	total RNA
GSM340771	Recurrent bladder tumor BT036.1	GPL6102	Recurrent non-muscle invasive tumor	Homo sapiens	recurrent non-muscle invasive tumor	total RNA
GSM340772	Recurrent bladder tumor BT036.2	GPL6102	Recurrent non-muscle invasive tumor	Homo sapiens	recurrent non-muscle invasive tumor	total RNA
GSM340773	Recurrent bladder tumor BT041.1	GPL6102	Recurrent non-muscle invasive tumor	Homo sapiens	recurrent non-muscle invasive tumor	total RNA
GSM340774	Recurrent bladder tumor BT042.1	GPL6102	Recurrent non-muscle invasive tumor	Homo sapiens	recurrent non-muscle invasive tumor	total RNA
GSM340775	Recurrent bladder tumor BT047.1	GPL6102	Recurrent non-muscle invasive tumor	Homo sapiens	recurrent non-muscle invasive tumor	total RNA
GSM340776	Recurrent bladder tumor BT047.2	GPL6102	Recurrent non-muscle invasive tumor	Homo sapiens	recurrent non-muscle invasive tumor	total RNA
GSM340777	Recurrent bladder tumor BT047.3	GPL6102	Recurrent non-muscle invasive tumor	Homo sapiens	recurrent non-muscle invasive tumor	total RNA
GSM340778	Recurrent bladder tumor BT047.4	GPL6102	Recurrent non-muscle invasive tumor	Homo sapiens	recurrent non-muscle invasive tumor	total RNA
GSM340779	Recurrent bladder tumor BT053.1	GPL6102	Recurrent non-muscle invasive tumor	Homo sapiens	recurrent non-muscle invasive tumor	total RNA
GSM340780	Recurrent bladder tumor BT057.2	GPL6102	Recurrent non-muscle invasive tumor	Homo sapiens	recurrent non-muscle invasive tumor	total RNA
GSM340781	Recurrent bladder tumor BT060.1	GPL6102	Recurrent non-muscle invasive tumor	Homo sapiens	recurrent non-muscle invasive tumor	total RNA
GSM340782	Recurrent bladder tumor BT060.2	GPL6102	Recurrent non-muscle invasive tumor	Homo sapiens	recurrent non-muscle invasive tumor	total RNA
GSM340783	Recurrent bladder tumor BT062.1	GPL6102	Recurrent non-muscle invasive tumor	Homo sapiens	recurrent non-muscle invasive tumor	total RNA
GSM340784	Recurrent bladder tumor BT062.2	GPL6102	Recurrent non-muscle invasive tumor	Homo sapiens	recurrent non-muscle invasive tumor	total RNA
GSM340785	Recurrent bladder tumor BT063.1	GPL6102	Recurrent non-muscle invasive tumor	Homo sapiens	recurrent non-muscle invasive tumor	total RNA
GSM340786	Recurrent bladder tumor BT067.1	GPL6102	Recurrent non-muscle invasive tumor	Homo sapiens	recurrent non-muscle invasive tumor	total RNA
GSM340787	Recurrent bladder tumor BT067.2	GPL6102	Recurrent non-muscle invasive tumor	Homo sapiens	recurrent non-muscle invasive tumor	total RNA
GSM340788	Recurrent bladder tumor BT067.3	GPL6102	Recurrent non-muscle invasive tumor	Homo sapiens	recurrent non-muscle invasive tumor	total RNA
GSM340789	Recurrent bladder tumor BT069.1	GPL6102	Recurrent non-muscle invasive tumor	Homo sapiens	recurrent non-muscle invasive tumor	total RNA
GSM340790	Recurrent bladder tumor BT071.1	GPL6102	Recurrent non-muscle invasive tumor	Homo sapiens	recurrent non-muscle invasive tumor	total RNA
GSM340791	Recurrent bladder tumor BT083.1	GPL6102	Recurrent non-muscle invasive tumor	Homo sapiens	recurrent non-muscle invasive tumor	total RNA
GSM340792	Recurrent bladder tumor BT095.1	GPL6102	Recurrent non-muscle invasive tumor	Homo sapiens	recurrent non-muscle invasive tumor	total RNA

## Sheet: Clinical of GSE48075
accession	title	platform	source	organism	cstage	gender	molecule	fgfr3 mutation (1;yes, 0;no)	ras mutation (1;yes, 0;no)	rb1 mutation (1;yes, 0;no)	p53 mutation (1;yes, 0;no)	age (at specimen collection)	os censor	dss censor	survival (mo)
GSM1167333	MDA1	GPL6947	Bladder tumor	Homo sapiens	cT1	Male	total RNA
GSM1167334	MDA2	GPL6947	Bladder tumor	Homo sapiens	cT2N0M0		total RNA	NA	NA	NA	NA	74.6	uncensored	uncensored	37.2
GSM1167335	MDA4	GPL6947	Bladder tumor	Homo sapiens	cT3bN0M0		total RNA	1	0	0	1	44.2	censored	censored	60
GSM1167336	MDA5	GPL6947	Bladder tumor	Homo sapiens	cT3bN+M+		total RNA	0	0	0	1	76.8	uncensored	uncensored	2.9
GSM1167337	MDA6	GPL6947	Bladder tumor	Homo sapiens	cTa	Female	total RNA
GSM1167338	MDA7	GPL6947	Bladder tumor	Homo sapiens	cT1N0M0	male	total RNA
GSM1167339	MDA8	GPL6947	Bladder tumor	Homo sapiens	cT3bN0M0		total RNA	1	0	0	0	83.1	uncensored	uncensored	7.6
GSM1167340	MDA9	GPL6947	Bladder tumor	Homo sapiens	cT1	Male	total RNA
GSM1167341	MDA10	GPL6947	Bladder tumor	Homo sapiens	cT1N0M0	male	total RNA
GSM1167342	MDA11	GPL6947	Bladder tumor	Homo sapiens	pT3bN0M0		total RNA	1	0	0	0	78.9	uncensored	uncensored	20.4
GSM1167343	MDA12	GPL6947	Bladder tumor	Homo sapiens	cT1N0M0	male	total RNA
GSM1167344	MDA14	GPL6947	Bladder tumor	Homo sapiens	cT2N0M0		total RNA	0	0	0	1	54.8	uncensored	censored	68.1
GSM1167345	MDA15	GPL6947	Bladder tumor	Homo sapiens	cT1N0M0	male	total RNA
GSM1167346	MDA16	GPL6947	Bladder tumor	Homo sapiens	cT2N0M0		total RNA	NA	NA	NA	NA	76.7	uncensored	uncensored	7.9
GSM1167347	MDA17	GPL6947	Bladder tumor	Homo sapiens	cT4bN0M+		total RNA	0	0	1	0	53	uncensored	uncensored	3.4
GSM1167348	MDA18	GPL6947	Bladder tumor	Homo sapiens	cT1	Male	total RNA
GSM1167349	MDA19	GPL6947	Bladder tumor	Homo sapiens	cT1	Male	total RNA
GSM1167350	MDA20	GPL6947	Bladder tumor	Homo sapiens	cT2N0M0		total RNA	0	0	1	1	80.8	uncensored	uncensored	23
GSM1167351	MDA21	GPL6947	Bladder tumor	Homo sapiens	cTa	Male	total RNA
GSM1167352	MDA22	GPL6947	Bladder tumor	Homo sapiens	cTaN0M0	male	total RNA
GSM1167353	MDA23	GPL6947	Bladder tumor	Homo sapiens	cTaN0M0	Female	total RNA
GSM1167354	MDA24	GPL6947	Bladder tumor	Homo sapiens	cT2N0M0		total RNA	0	0	0	1	66.9	uncensored	censored	105.9
GSM1167355	MDA25	GPL6947	Bladder tumor	Homo sapiens	cTaN0M0	male	total RNA
GSM1167356	MDA26	GPL6947	Bladder tumor	Homo sapiens	cTaN0M0	male	total RNA
GSM1167357	MDA27	GPL6947	Bladder tumor	Homo sapiens	cTa/isN0M0	female	total RNA
GSM1167358	MDA28	GPL6947	Bladder tumor	Homo sapiens	cTaN0M0	male	total RNA
GSM1167359	MDA29	GPL6947	Bladder tumor	Homo sapiens	cTaN0M0	male	total RNA
GSM1167360	MDA30	GPL6947	Bladder tumor	Homo sapiens	cT4bN0M0		total RNA	NA	NA	NA	NA	70.9	uncensored	censored	10.5
GSM1167361	MDA31	GPL6947	Bladder tumor	Homo sapiens	cT3bN0M0		total RNA	0	0	0	0	63.1	censored	censored	53.1
GSM1167362	MDA32	GPL6947	Bladder tumor	Homo sapiens	cTaN0M0	male	total RNA
GSM1167363	MDA33	GPL6947	Bladder tumor	Homo sapiens	cT3bN0M0		total RNA	NA	NA	NA	NA	73.3	uncensored	uncensored	14.2
GSM1167364	MDA34	GPL6947	Bladder tumor	Homo sapiens	cTaN0M0	male	total RNA
GSM1167365	MDA35	GPL6947	Bladder tumor	Homo sapiens	cTaN0M0	male	total RNA
GSM1167366	MDA36	GPL6947	Bladder tumor	Homo sapiens	cT1N0M0	male	total RNA
GSM1167367	MDA37	GPL6947	Bladder tumor	Homo sapiens	cTaN0M0	Female	total RNA
GSM1167368	MDA38	GPL6947	Bladder tumor	Homo sapiens	cTa/isN0M0	male	total RNA
GSM1167369	MDA39	GPL6947	Bladder tumor	Homo sapiens	cTaN0M0	Female	total RNA
GSM1167370	MDA40	GPL6947	Bladder tumor	Homo sapiens	cTaN0M0	Female	total RNA
GSM1167371	MDA41	GPL6947	Bladder tumor	Homo sapiens	cTa	Female	total RNA
GSM1167372	MDA42	GPL6947	Bladder tumor	Homo sapiens	cT2N0M0		total RNA	0	0	0	0	69.1	censored	censored	42
GSM1167373	MDA43	GPL6947	Bladder tumor	Homo sapiens	cT2N0M0		total RNA	0	1	0	0	65.4	censored	censored	47.8
GSM1167374	MDA44	GPL6947	Bladder tumor	Homo sapiens	cT1N0M0	male	total RNA
GSM1167375	MDA45	GPL6947	Bladder tumor	Homo sapiens	cT2N0M0		total RNA	0	0	0	0	52.5	uncensored	uncensored	42.8
GSM1167376	MDA46	GPL6947	Bladder tumor	Homo sapiens	cT3bN0M0		total RNA	0	0	0	1	73.6	uncensored	uncensored	46.3
GSM1167377	MDA47	GPL6947	Bladder tumor	Homo sapiens	cT4aN0M0		total RNA	0	0	0	0	55.6	censored	censored	51.5
GSM1167378	MDA48	GPL6947	Bladder tumor	Homo sapiens	cT2N0M0		total RNA	0	0	0	0	72.1	censored	censored	41.1
GSM1167379	MDA49	GPL6947	Bladder tumor	Homo sapiens	cT4bN0M0		total RNA	0	0	0	1	89	uncensored	uncensored	4.7
GSM1167380	MDA50	GPL6947	Bladder tumor	Homo sapiens	cT3bN+M0		total RNA	0	0	0	0	71.7	uncensored	uncensored	36.3
GSM1167381	MDA51	GPL6947	Bladder tumor	Homo sapiens	cT2N0M0		total RNA	0	0	0	0	84.3	uncensored	uncensored	8
GSM1167382	MDA52	GPL6947	Bladder tumor	Homo sapiens	cT1N0	Male	total RNA
GSM1167383	MDA53	GPL6947	Bladder tumor	Homo sapiens	cT2N0M+		total RNA	0	0	0	0	63.3	uncensored	uncensored	9.3
GSM1167384	MDA54	GPL6947	Bladder tumor	Homo sapiens	cT3bN+M0		total RNA	0	0	0	0	68	uncensored	uncensored	11.8
GSM1167385	MDA55	GPL6947	Bladder tumor	Homo sapiens	cT3bN0M0		total RNA	0	0	0	0	76.5	uncensored	uncensored	16
GSM1167386	MDA56	GPL6947	Bladder tumor	Homo sapiens	cT1N0	Female	total RNA
GSM1167387	MDA57	GPL6947	Bladder tumor	Homo sapiens	cT2N+M0		total RNA	0	0	0	0	67.7	uncensored	uncensored	5.9
GSM1167388	MDA58	GPL6947	Bladder tumor	Homo sapiens	cT3aN0M0		total RNA	0	0	0	1	66	uncensored	uncensored	8.1
GSM1167389	MDA59	GPL6947	Bladder tumor	Homo sapiens	cT3bN+M+		total RNA	0	0	0	0	64.1	censored	censored	1.7
GSM1167390	MDA60	GPL6947	Bladder tumor	Homo sapiens	cT3bN0M0		total RNA	0	0	0	0	66.3	uncensored	uncensored	25.3
GSM1167391	MDA61	GPL6947	Bladder tumor	Homo sapiens	cT2N+M0		total RNA	0	0	0	1	70.2	uncensored	uncensored	17.4
GSM1167392	MDA62	GPL6947	Bladder tumor	Homo sapiens	cT1N0M0	Male	total RNA
GSM1167393	MDA63	GPL6947	Bladder tumor	Homo sapiens	cT3bN+M0		total RNA	0	0	0	0	78.6	uncensored	uncensored	3.4
GSM1167394	MDA64	GPL6947	Bladder tumor	Homo sapiens	cT1N0M0	Female	total RNA
GSM1167395	MDA65	GPL6947	Bladder tumor	Homo sapiens	cT1N0M0	Male	total RNA
GSM1167396	MDA66	GPL6947	Bladder tumor	Homo sapiens	cT3bN+M0		total RNA	0	0	0	0	80.4	uncensored	uncensored	4.6
GSM1167397	MDA67	GPL6947	Bladder tumor	Homo sapiens	cT1N0	Female	total RNA
GSM1167398	MDA68	GPL6947	Bladder tumor	Homo sapiens	cT2N+M+		total RNA	0	1	0	0	58.9	uncensored	uncensored	6.5
GSM1167399	MDA69	GPL6947	Bladder tumor	Homo sapiens	cT2N0M0		total RNA	0	0	0	0	62.8	censored	censored	179.2
GSM1167400	MDA70	GPL6947	Bladder tumor	Homo sapiens	cT2N0M0		total RNA	1	0	0	0	60.2	uncensored	censored	86.7
GSM1167401	MDA71	GPL6947	Bladder tumor	Homo sapiens	cT2N0M0		total RNA	1	0	0	0	67.6	uncensored	uncensored	8
GSM1167402	MDA72	GPL6947	Bladder tumor	Homo sapiens	cT3bN0M0		total RNA	0	0	0	1	77.4	uncensored	censored	110.2
GSM1167403	MDA73	GPL6947	Bladder tumor	Homo sapiens	cT2N0M0		total RNA	0	0	0	0	54	uncensored	censored	61
GSM1167404	MDA74	GPL6947	Bladder tumor	Homo sapiens	cT3aN0M0		total RNA	0	0	0	0	73.7	uncensored	censored	82.4
GSM1167405	MDA75	GPL6947	Bladder tumor	Homo sapiens	cTaN0	Female	total RNA
GSM1167406	MDA77	GPL6947	Bladder tumor	Homo sapiens	cT3bN0M0		total RNA	0	0	0	1	88.9	uncensored	censored	4.9
GSM1167407	MDA78	GPL6947	Bladder tumor	Homo sapiens	cT1N0M0	male	total RNA
GSM1167408	MDA79	GPL6947	Bladder tumor	Homo sapiens	cTa-T1N0	Male	total RNA
GSM1167409	MDA82	GPL6947	Bladder tumor	Homo sapiens	cTaN0	Female	total RNA
GSM1167410	MDA85	GPL6947	Bladder tumor	Homo sapiens	cT2N0M0		total RNA	0	0	0	0	83.1	uncensored	censored	28.7
GSM1167411	MDA86	GPL6947	Bladder tumor	Homo sapiens	cTaN0	Male	total RNA
GSM1167412	MDA87	GPL6947	Bladder tumor	Homo sapiens	cTaN0	Male	total RNA
GSM1167413	MDA88	GPL6947	Bladder tumor	Homo sapiens	cTaN0M0	male	total RNA
GSM1167414	MDA89	GPL6947	Bladder tumor	Homo sapiens	cT2N0M0		total RNA	NA	NA	NA	NA	79.1	censored	censored	109.3
GSM1167415	MDA90	GPL6947	Bladder tumor	Homo sapiens	cT1N0M0	male	total RNA
GSM1167416	MDA91	GPL6947	Bladder tumor	Homo sapiens	cT3bN0M0		total RNA	0	0	1	1	85.8	censored	censored	9
GSM1167417	MDA92	GPL6947	Bladder tumor	Homo sapiens	cT1N0M0	male	total RNA
GSM1167418	MDA93	GPL6947	Bladder tumor	Homo sapiens	cT1N0M0	male	total RNA
GSM1167419	MDA94	GPL6947	Bladder tumor	Homo sapiens	cT2N0M0		total RNA	0	0	0	1	57.5	censored	censored	66.5
GSM1167420	MDA95	GPL6947	Bladder tumor	Homo sapiens	cT2N0M0		total RNA	0	0	0	0	71.4	censored	censored	64.2
GSM1167421	MDA96	GPL6947	Bladder tumor	Homo sapiens	cT1N0M0	male	total RNA
GSM1167422	MDA97	GPL6947	Bladder tumor	Homo sapiens	cT2N0M0		total RNA	0	0	1	0	67.7	censored	censored	57.3
GSM1167423	MDA98	GPL6947	Bladder tumor	Homo sapiens	cTisN0M0	male	total RNA
GSM1167424	MDA99	GPL6947	Bladder tumor	Homo sapiens	cT2N0M0		total RNA	0	0	0	0	71.4	censored	censored	39.5
GSM1167425	MDA100	GPL6947	Bladder tumor	Homo sapiens	cT1N0M0	female	total RNA
GSM1167426	MDA101	GPL6947	Bladder tumor	Homo sapiens	cT1N0M0	male	total RNA
GSM1167427	MDA102	GPL6947	Bladder tumor	Homo sapiens	cT1N0M0	male	total RNA
GSM1167428	MDA103	GPL6947	Bladder tumor	Homo sapiens	cT2N0M0		total RNA	0	0	0	1	65	uncensored	uncensored	65.6
GSM1167429	MDA104	GPL6947	Bladder tumor	Homo sapiens	cT3bN0M0		total RNA	1	0	0	1	65.7	censored	censored	37.7
GSM1167430	MDA105	GPL6947	Bladder tumor	Homo sapiens	cTaN0M0	male	total RNA
GSM1167431	MDA106	GPL6947	Bladder tumor	Homo sapiens	cT1N0M0	Female	total RNA
GSM1167432	MDA107	GPL6947	Bladder tumor	Homo sapiens	cTaN0M0	Male	total RNA
GSM1167433	MDA108	GPL6947	Bladder tumor	Homo sapiens	cT4aN0M0		total RNA	0	0	0	0	67.9	censored	censored	72.4
GSM1167434	MDA109	GPL6947	Bladder tumor	Homo sapiens	cT2N0M0		total RNA	1	0	0	0	60.7	uncensored	uncensored	14.9
GSM1167435	MDA110	GPL6947	Bladder tumor	Homo sapiens	cT3bN0M0		total RNA	1	0	1	0	86.2	uncensored	uncensored	18.2
GSM1167436	MDA111	GPL6947	Bladder tumor	Homo sapiens	cT2N0M0		total RNA	0	0	0	1	83.2	censored	censored	47.7
GSM1167437	MDA112	GPL6947	Bladder tumor	Homo sapiens	cT2N0M0		total RNA	0	0	0	0	52.4	censored	censored	52.2
GSM1167438	MDA113	GPL6947	Bladder tumor	Homo sapiens	cT1N0M0	male	total RNA
GSM1167439	MDA114	GPL6947	Bladder tumor	Homo sapiens	cT2N0M0		total RNA	0	0	0	1	68.8	uncensored	uncensored	34.6
GSM1167440	MDA115	GPL6947	Bladder tumor	Homo sapiens	cT1N0M0	male	total RNA
GSM1167441	MDA116	GPL6947	Bladder tumor	Homo sapiens	cT3aN0M0		total RNA	0	0	0	1	68.6	uncensored	uncensored	4.3
GSM1167442	MDA117	GPL6947	Bladder tumor	Homo sapiens	cTaN0M0	male	total RNA
GSM1167443	MDA118	GPL6947	Bladder tumor	Homo sapiens	cT2N0M0		total RNA	0	0	0	0	68.9	uncensored	censored	7.4
GSM1167444	MDA119	GPL6947	Bladder tumor	Homo sapiens	cT2N0M0		total RNA	0	0	0	1	69.1	censored	censored	71.4
GSM1167445	MDA120	GPL6947	Bladder tumor	Homo sapiens	cT2N0M0		total RNA	0	0	0	1	69.2	uncensored	uncensored	6.2
GSM1167446	MDA121	GPL6947	Bladder tumor	Homo sapiens	cTaN0M0	Male	total RNA
GSM1167447	MDA122	GPL6947	Bladder tumor	Homo sapiens	cTaN0M0	Male	total RNA
GSM1167448	MDA123	GPL6947	Bladder tumor	Homo sapiens	cTaN0M0	Female	total RNA
GSM1167449	MDA124	GPL6947	Bladder tumor	Homo sapiens	cT4aN0M0		total RNA	1	0	0	0	53.6	censored	censored	36.2
GSM1167450	MDA125	GPL6947	Bladder tumor	Homo sapiens	cTaN0M0	Male	total RNA
GSM1167451	MDA126	GPL6947	Bladder tumor	Homo sapiens	cT2N0M0		total RNA	1	0	0	0	51.3	censored	censored	27.8
GSM1167452	MDA127	GPL6947	Bladder tumor	Homo sapiens	cTaN0M0	male	total RNA
GSM1167453	MDA128	GPL6947	Bladder tumor	Homo sapiens	cT4bN0M0		total RNA	0	0	0	0	65.6	uncensored	uncensored	18.7
GSM1167454	MDA129	GPL6947	Bladder tumor	Homo sapiens	cT2N0M0		total RNA	0	1	0	1	72.4	censored	censored	43.2
GSM1167455	MDA130	GPL6947	Bladder tumor	Homo sapiens	cT2N0M0		total RNA	1	0	1	1	42.7	censored	censored	140.7
GSM1167456	MDA131	GPL6947	Bladder tumor	Homo sapiens	cTaN0M0	Male	total RNA
GSM1167457	MDA132	GPL6947	Bladder tumor	Homo sapiens	cT4aN+M+		total RNA	0	0	0	0	63.3	censored	censored	44.6
GSM1167458	MDA133	GPL6947	Bladder tumor	Homo sapiens	cT2N0M0		total RNA	0	0	1	0	65.4	censored	censored	38.7
GSM1167459	MDA134	GPL6947	Bladder tumor	Homo sapiens	CT1N+M+	Male	total RNA
GSM1167460	MDA135	GPL6947	Bladder tumor	Homo sapiens	cT1N0M0	Male	total RNA
GSM1167461	MDA136	GPL6947	Bladder tumor	Homo sapiens	cT3bN0M+		total RNA	0	0	0	1	82.1	uncensored	uncensored	1.5
GSM1167462	MDA137	GPL6947	Bladder tumor	Homo sapiens	cT2N+M0		total RNA	1	0	0	0	64.8	uncensored	uncensored	1.6
GSM1167463	MDA138	GPL6947	Bladder tumor	Homo sapiens	cTaN0M0	Male	total RNA
GSM1167464	MDA139	GPL6947	Bladder tumor	Homo sapiens	cT1N0M0	Male	total RNA
GSM1167465	MDA140	GPL6947	Bladder tumor	Homo sapiens	cTis/cT2N0M0		total RNA	0	0	0	0	72.1	uncensored	uncensored	8.7
GSM1167466	MDA141	GPL6947	Bladder tumor	Homo sapiens	cT2N0M0		total RNA	0	0	0	0	62.4	censored	censored	30.4
GSM1167467	MDA142	GPL6947	Bladder tumor	Homo sapiens	cT1N0M0	male	total RNA
GSM1167468	MDA143	GPL6947	Bladder tumor	Homo sapiens	cT2N0M0		total RNA	0	0	0	0	73.5	censored	censored	61.1
GSM1167469	MDA145	GPL6947	Bladder tumor	Homo sapiens	cT2N0M0		total RNA	NA	NA	NA	NA	57.5	censored	censored	39
GSM1167470	MDA146	GPL6947	Bladder tumor	Homo sapiens	cT1N0M0	female	total RNA
GSM1167471	MDA147	GPL6947	Bladder tumor	Homo sapiens	cTisN0M0	male	total RNA
GSM1167472	MDA148	GPL6947	Bladder tumor	Homo sapiens	cTaN0M0	male	total RNA
GSM1167473	MDA149	GPL6947	Bladder tumor	Homo sapiens	cT2N0M0		total RNA	NA	NA	NA	NA	75.8	uncensored	uncensored	16.9
GSM1167474	MDA150	GPL6947	Bladder tumor	Homo sapiens	cT1N0M0	female	total RNA

## Sheet: Clinical of GSE48276
accession	title	platform	source	organism	cstage	histology tur	pstage	cystectomy histology	nac	age (at diagnosis)	race	gender	os censor	dss censor	survival (mo)	molecule
GSM1173901	MDA_FFPE1	GPL14951	Bladder tumor	Homo sapiens	T3bN0M0	urothelial	pT3bN2M0	urothelial	no	81.7	Caucasian	M	uncensored	censored	23.5	total RNA
GSM1173902	MDA_FFPE2	GPL14951	Bladder tumor	Homo sapiens	T1N0M0	urothelial	pT3bN1M1	urothelial	no	41	Caucasian	M	uncensored	uncensored	24.2	total RNA
GSM1173903	MDA_FFPE3	GPL14951	Bladder tumor	Homo sapiens	T3aN0M0	urothelial	pT3bN2M0	urothelial	no	62.6	Caucasian	M	censored	censored	180	total RNA
GSM1173904	MDA_FFPE4	GPL14951	Bladder tumor	Homo sapiens	T2N0M0	urothelial	pT3bN1M0	urothelial	na	66.7	Caucasian	M	uncensored	censored	105.9	total RNA
GSM1173905	MDA_FFPE5	GPL14951	Bladder tumor	Homo sapiens	T2N0M0	urothelial	pT3bN2M0	sarcomatoid diff	no	46.2	Caucasian	M	uncensored	uncensored	15.5	total RNA
GSM1173906	MDA_FFPE6	GPL14951	Bladder tumor	Homo sapiens	T1N0M0	urothelial	pT3aN1M0	urothelial	na	72.3	Caucasian	M	censored	censored	125.1	total RNA
GSM1173907	MDA_FFPE7	GPL14951	Bladder tumor	Homo sapiens	T2N0M0	urothelial	pT3aN2M0	urothelial	no	55.7	Caucasian	M	censored	censored	72.9	total RNA
GSM1173908	MDA_FFPE8	GPL14951	Bladder tumor	Homo sapiens	T3bN0M0	squamous diff	pT3bN2M0	urothelial	no	44.3	Caucasian	M	censored	censored	46.3	total RNA
GSM1173909	MDA_FFPE9	GPL14951	Bladder tumor	Homo sapiens	T2N0M0	squamous diff	pT3aN2M0	urothelial	no	54.2	Caucasian	F	censored	censored	56.3	total RNA
GSM1173910	MDA_FFPE10	GPL14951	Bladder tumor	Homo sapiens	T2N0M0	urothelial	pT3bN0M0	urothelial	na	71.4	Caucasian	M	censored	censored	62.8	total RNA
GSM1173911	MDA_FFPE11	GPL14951	Bladder tumor	Homo sapiens	T3bN0M0	urothelial	pT4aN2M0	urothelial	no	73.3	Caucasian	M	uncensored	uncensored	5.7	total RNA
GSM1173912	MDA_FFPE12	GPL14951	Bladder tumor	Homo sapiens	T3N0M0	urothelial	pT3aN0M0	urothelial	no	81.2	Caucasian	M	uncensored	censored	12.9	total RNA
GSM1173913	MDA_FFPE13	GPL14951	Bladder tumor	Homo sapiens	T1N0M0	urothelial	pT2bN0M0	urothelial	no	85.5	Caucasian	M	censored	censored	31.9	total RNA
GSM1173914	MDA_FFPE14	GPL14951	Bladder tumor	Homo sapiens	T2N0M0	urothelial	pT3bN0M0	urothelial	no	54.7	Caucasian	M	uncensored	censored	68.8	total RNA
GSM1173915	MDA_FFPE15	GPL14951	Bladder tumor	Homo sapiens	T2N0M0	squamous diff	pT3bN0M0	urothelial ?sarc diff	no	63.3	Caucasian	M	uncensored	uncensored	79.2	total RNA
GSM1173916	MDA_FFPE16	GPL14951	Bladder tumor	Homo sapiens	T2N0M1	squamous diff	pT4aN0M0	urothelial	no	67.7	Caucasian	F	uncensored	uncensored	4.9	total RNA
GSM1173917	MDA_FFPE17	GPL14951	Bladder tumor	Homo sapiens	T2N0M0	sarcomatoid diff	pT4aN2M0	sarcomatoid diff	no	69.3	Black	M	uncensored	uncensored	25.3	total RNA
GSM1173918	MDA_FFPE18	GPL14951	Bladder tumor	Homo sapiens	T1bN0M0	squamous diff	pT2bN2M0	squamous diff	na	62.4	Caucasian	M	censored	censored	69.3	total RNA
GSM1173919	MDA_FFPE19	GPL14951	Bladder tumor	Homo sapiens	T2N0M0	squamous diff	pT3bN2M0	squamous diff	no	65.4	Hispanic	F	uncensored	uncensored	17.2	total RNA
GSM1173920	MDA_FFPE20	GPL14951	Bladder tumor	Homo sapiens	T2N0M0	urothelial	pT3bN2M0	urothelial	na	67.6	Caucasian	M	censored	censored	51.5	total RNA
GSM1173921	MDA_FFPE21	GPL14951	Bladder tumor	Homo sapiens	T2N0M0	urothelial	pT2bN0M0	urothelial	no	55.4	Caucasian	M	censored	censored	82.2	total RNA
GSM1173922	MDA_FFPE22	GPL14951	Bladder tumor	Homo sapiens	T2N0M0	urothelial	pT4aN0M0	urothelial	na	68.9	Caucasian	M	censored	censored	71.4	total RNA
GSM1173923	MDA_FFPE23	GPL14951	Bladder tumor	Homo sapiens	T2N0M0	urothelial	pT3bN1M0	urothelial	no	75.6	Caucasian	M	uncensored	censored	16.9	total RNA
GSM1173924	MDA_FFPE24	GPL14951	Bladder tumor	Homo sapiens	T2N0M0	urothelial	pT3bN2M0	lymphoepithelioma, focal glandular	na	52.3	Caucasian	M	censored	censored	52.2	total RNA
GSM1173925	MDA_FFPE25	GPL14951	Bladder tumor	Homo sapiens	T2N0M0	urothelial	pT3bN2M0	urothelial	no	57.5	Caucasian	M	censored	censored	66.5	total RNA
GSM1173926	MDA_FFPE26	GPL14951	Bladder tumor	Homo sapiens	T2N2M0	focal glandular	pT3aN2M0	urothelial focal glandular	no	57.4	Asian	M	censored	censored	39	total RNA
GSM1173927	MDA_FFPE27	GPL14951	Bladder tumor	Homo sapiens	T2N0M0	micropapillary	pT3bN2M0	micropapillary	no	75	Caucasian	M	uncensored	uncensored	31.9	total RNA
GSM1173928	MDA_FFPE28	GPL14951	Bladder tumor	Homo sapiens	T2N0M0	urothelial	pT3aN0M0	urothelial	na	83	Caucasian	M	uncensored	censored	28.7	total RNA
GSM1173929	MDA_FFPE29	GPL14951	Bladder tumor	Homo sapiens	T3bN0M0	squamous diff	pT3bN2M0	squamous diff	no	64.3	Caucasian	M	uncensored	uncensored	25	total RNA
GSM1173930	MDA_FFPE30	GPL14951	Bladder tumor	Homo sapiens	T1N0M0	urothelial	pT2bN2M0	urothelial, focal glandular	no	58.2	Hispanic	M	uncensored	uncensored	31.8	total RNA
GSM1173931	MDA_FFPE31	GPL14951	Bladder tumor	Homo sapiens	T2N0M0	urothelial focal glandular	pT3bN2M0	urothelial	na	41	White	M	uncensored	uncensored	5.5	total RNA
GSM1173932	MDA_FFPE32	GPL14951	Bladder tumor	Homo sapiens	T2N0M0	urothelial	pT2bN0M0	urothelial	na	67.6	Hispanic	M	censored	censored	57.3	total RNA
GSM1173933	MDA_FFPE33	GPL14951	Bladder tumor	Homo sapiens	T1N0M0	urothelial	pT2bN0M0	urothelial	na	69.1	Caucasian	F	censored	censored	58.5	total RNA
GSM1173934	MDA_FFPE34	GPL14951	Bladder tumor	Homo sapiens	T2N0M0	urothelial	pT3aN0M0	urothelial	na	68.8	Caucasian	F	uncensored	uncensored	34	total RNA
GSM1173935	MDA_FFPE35	GPL14951	Bladder tumor	Homo sapiens	T2N0M0	urothelial	pT2bN0M0	urothelial	na	72.2	Caucasian	M	censored	censored	46.2	total RNA
GSM1173936	MDA_FFPE36	GPL14951	Bladder tumor	Homo sapiens	T2N0M0	micropapillary	pT3bN2M0	micropapillary/focal glandular	no	79	Caucasian	M	uncensored	uncensored	47	total RNA
GSM1173937	MDA_FFPE37	GPL14951	Bladder tumor	Homo sapiens	T2N0M0	micropapillary	pT3bN2M0	urothelial signet ring features	no	85.6	Caucasian	M	uncensored	uncensored	37.5	total RNA
GSM1173938	MDA_FFPE38	GPL14951	Bladder tumor	Homo sapiens	T2N0M0	urothelial	pT3bN1M0	urothelial	na	71.1	Caucasian	M	uncensored	censored	3.9	total RNA
GSM1173939	MDA_FFPE39	GPL14951	Bladder tumor	Homo sapiens	T2N0M0	urothelial	pT2bN2M0	urothelial	na	58.7	Caucasian	M	censored	censored	38.1	total RNA
GSM1173940	MDA_FFPE40	GPL14951	Bladder tumor	Homo sapiens	T2N0M0	urothelial	pT3aN2M0	urothelial	na	69.4	Caucasian	M	censored	censored	135.3	total RNA
GSM1173941	MDA_FFPE41	GPL14951	Bladder tumor	Homo sapiens	T2N0M0	urothelial	pT3aN2M0	urothelial	na	70.4	Hispanic	M	censored	censored	44.2	total RNA
GSM1173942	MDA_FFPE42	GPL14951	Bladder tumor	Homo sapiens	TisN0M0	urothelial	pT4aN2M0	urothelial	na	66.4	Caucasian	M	censored	censored	53.2	total RNA
GSM1173943	MDA_FFPE43	GPL14951	Bladder tumor	Homo sapiens	T2N0M0	squamous diff	pT3bN1M0	squamous diff	no	68.8	Caucasian	M	uncensored	censored	7.4	total RNA
GSM1173944	MDA_FFPE44	GPL14951	Bladder tumor	Homo sapiens	T2N0M0	squamous diff	pT3bN2M0	micropapillary/focal squamous	na	69.2	Black	M	uncensored	uncensored	4.8	total RNA
GSM1173945	MDA_FFPE45	GPL14951	Bladder tumor	Homo sapiens	T3bN0M0	urothelial	pT4aN2M0	urothelial	no	89.6	Caucasian	F	uncensored	uncensored	9.6	total RNA
GSM1173946	MDA_FFPE46	GPL14951	Bladder tumor	Homo sapiens	T2N0M0	urothelial	pT2bN1M0	urothelial	na	48.2	Caucasian	M	censored	censored	61.7	total RNA
GSM1173947	MDA_FFPE47	GPL14951	Bladder tumor	Homo sapiens	T2N0M0	urothelial	pT4aN0M0	urothelial	no	60.8	Caucasian	M	censored	censored	34.1	total RNA
GSM1173948	MDA_FFPE48	GPL14951	Bladder tumor	Homo sapiens	T1bN0M0	urothelial	pT1aN0M0	urothelial	no	59.9	Caucasian	M	censored	censored	26.6	total RNA
GSM1173949	MDA_FFPE49	GPL14951	Bladder tumor	Homo sapiens	T2N0M0	urothelial	pT3aN0M0	squamous diff	no	72.7	Caucasian	F	censored	censored	43.5	total RNA
GSM1173950	MDA_FFPE50	GPL14951	Bladder tumor	Homo sapiens	T2N0M0	urothelial	pT3bN0M0	urothelial	no	73	Caucasian	M	censored	censored	26.9	total RNA
GSM1173951	MDA_FFPE51	GPL14951	Bladder tumor	Homo sapiens	T2N0M1	urothelial	pT2bN1M0	urothelial	no	67.3	Caucasian	M	censored	censored	26	total RNA
GSM1173952	MDA_FFPE52	GPL14951	Bladder tumor	Homo sapiens	T2N0M0	squamous diff	pT3bN0M0	urothelial	no	73	Caucasian	F	censored	censored	41.4	total RNA
GSM1173953	MDA_FFPE53	GPL14951	Bladder tumor	Homo sapiens	T1N0M0	urothelial	pT4aN0M0	urothelial	no	62.4	Caucasian	M	censored	censored	22.8	total RNA
GSM1173954	MDA_FFPE54	GPL14951	Bladder tumor	Homo sapiens	TaN0M0	urothelial	pT2aN0M0	urothelial	no	62.6	Caucasian	M	censored	censored	46.5	total RNA
GSM1173955	MDA_FFPE55	GPL14951	Bladder tumor	Homo sapiens	T1N0M0	urothelial	pT1aN0M0	focal micropapillary	no	59.2	Black	M	censored	censored	43.7	total RNA
GSM1173956	MDA_FFPE56	GPL14951	Bladder tumor	Homo sapiens	T2N0M0	urothelial	pT3aN0M0	squamous diff	no	56.4	Caucasian	M	uncensored	uncensored	20.8	total RNA
GSM1173957	MDA_FFPE57	GPL14951	Bladder tumor	Homo sapiens	T2N0M0	squamous diff	pT2bN1M0	urothelial	no	69.7	Caucasian	M	uncensored	censored	32	total RNA
GSM1173968	MDA_FFPE68	GPL14951	Bladder tumor	Homo sapiens	T2N0M0	urothelial	pT2N1M0	urothelial	yes-MVAC/A	65	Caucasian	M	uncensored	uncensored	15.3	total RNA
GSM1173969	MDA_FFPE69	GPL14951	Bladder tumor	Homo sapiens	T2N0M0	urothelial	pT3aN0M1	urothelial	yes-MVAC/A	63.6	Caucasian	M	uncensored	uncensored	35.4	total RNA
GSM1173970	MDA_FFPE70	GPL14951	Bladder tumor	Homo sapiens	T3bN0M0	urothelial- focal micropapillary	pT3bN1M0	urothelial with micropap and squam diff	yes-MVAC/A	69.1	Caucasian	F	uncensored	uncensored	32.1	total RNA
GSM1173971	MDA_FFPE71	GPL14951	Bladder tumor	Homo sapiens	T3bN0M0	urothelial	pT0N0M0	no tumor identified	yes-MVAC/A	62.6	Caucasian	F	censored	censored	27.4	total RNA
GSM1173972	MDA_FFPE72	GPL14951	Bladder tumor	Homo sapiens	T2N0M0	urothelial	pT0N0M0	no tumor identified	yes-MVAC/A	58.7	Caucasian	M	censored	censored	54	total RNA
GSM1173973	MDA_FFPE73	GPL14951	Bladder tumor	Homo sapiens	T2N0M0	urothelial	pT3aN0M0	urothelial	yes-MVAC/A	71.8	Caucasian	M	uncensored	uncensored	9.5	total RNA
GSM1173974	MDA_FFPE74	GPL14951	Bladder tumor	Homo sapiens	T3bN0M0	urothelial with focal micropapillary	pT3bN1M0	urothelial	yes-MVAC/A	73.4	Caucasian	M	uncensored	uncensored	47.5	total RNA
GSM1173975	MDA_FFPE75	GPL14951	Bladder tumor	Homo sapiens	T3bN0M0	urothelial	pT0N0M0	no tumor identified	yes-MVAC/A	61.6	Caucasian	F	censored	censored	43.5	total RNA
GSM1173976	MDA_FFPE76	GPL14951	Bladder tumor	Homo sapiens	T2N0M0	urothelial	pT3aN0M0	urothelial focal glandular	yes-MVAC/A	68.1	Caucasian	M	uncensored	uncensored	40.2	total RNA
GSM1173977	MDA_FFPE77	GPL14951	Bladder tumor	Homo sapiens	T3bN0M0	urothelial	pT0N0M0	no tumor identified	yes-MVAC/A	75.8	Caucasian	M	censored	censored	39.5	total RNA
GSM1173978	MDA_FFPE78	GPL14951	Bladder tumor	Homo sapiens	T2N0M0	urothelial	pT0N0M0	no tumor identified	yes-MVAC/A	65.3	Caucasian	M	censored	censored	38.7	total RNA
GSM1173979	MDA_FFPE79	GPL14951	Bladder tumor	Homo sapiens	T4N0M0	urothelial	pT4N2M0	urothelial	yes-MVAC/A	69.1	Caucasian	F	uncensored	uncensored	12.4	total RNA
GSM1173980	MDA_FFPE80	GPL14951	Bladder tumor	Homo sapiens	T2N0M0	urothelial	pT1N0M0	urothelial and cis	yes-MVAC/A	59.8	Caucasian	M	censored	censored	30.1	total RNA
GSM1173981	MDA_FFPE81	GPL14951	Bladder tumor	Homo sapiens	T3bN0M0	urothelial	pT4aN1M0	urothelial	yes-MVAC/A	60.9	Caucasian	F	uncensored	uncensored	25.4	total RNA
GSM1173982	MDA_FFPE82	GPL14951	Bladder tumor	Homo sapiens	T3N0M0	urothelial	pT0N0M0	no tumor identified	yes-MVAC/A	68.9	Caucasian	F	censored	censored	24	total RNA
GSM1173983	MDA_FFPE83	GPL14951	Bladder tumor	Homo sapiens	T3N0M0	urothelial	pT3bN0M0	urothelial	yes-MVAC/A	54.6	Caucasian	M	censored	censored	27.7	total RNA
GSM1173986	PHIL_FFPE1	GPL14951	Bladder tumor	Homo sapiens	T3N0M0											total RNA
GSM1173987	PHIL_FFPE2	GPL14951	Bladder tumor	Homo sapiens	T2N0M0											total RNA
GSM1173988	PHIL_FFPE3	GPL14951	Bladder tumor	Homo sapiens	T2N0M0											total RNA
GSM1173989	PHIL_FFPE4	GPL14951	Bladder tumor	Homo sapiens	T4NxM0											total RNA
GSM1173990	PHIL_FFPE5	GPL14951	Bladder tumor	Homo sapiens	T3N0M0											total RNA
GSM1173991	PHIL_FFPE6	GPL14951	Bladder tumor	Homo sapiens	T3N0M0											total RNA
GSM1173992	PHIL_FFPE7	GPL14951	Bladder tumor	Homo sapiens	T3N0M0											total RNA
GSM1173993	PHIL_FFPE8	GPL14951	Bladder tumor	Homo sapiens	T2N0M0											total RNA
GSM1173994	PHIL_FFPE9	GPL14951	Bladder tumor	Homo sapiens	T3N0M0											total RNA
GSM1173995	PHIL_FFPE10	GPL14951	Bladder tumor	Homo sapiens	T2N0M0											total RNA
GSM1173996	PHIL_FFPE11	GPL14951	Bladder tumor	Homo sapiens	T2N1M0											total RNA
GSM1173997	PHIL_FFPE12	GPL14951	Bladder tumor	Homo sapiens	T3N0M0											total RNA
GSM1173998	PHIL_FFPE13	GPL14951	Bladder tumor	Homo sapiens	T2N0M0											total RNA
GSM1173999	PHIL_FFPE14	GPL14951	Bladder tumor	Homo sapiens	T3N1M0											total RNA
GSM1174000	PHIL_FFPE15	GPL14951	Bladder tumor	Homo sapiens	T2N0M0											total RNA
GSM1174001	PHIL_FFPE16	GPL14951	Bladder tumor	Homo sapiens	T3N0M0											total RNA
GSM1174002	PHIL_FFPE17	GPL14951	Bladder tumor	Homo sapiens	T2N0M0											total RNA
GSM1174003	PHIL_FFPE18	GPL14951	Bladder tumor	Homo sapiens	T3N0M0											total RNA
GSM1174004	PHIL_FFPE19	GPL14951	Bladder tumor	Homo sapiens	T3N0M0											total RNA
GSM1174005	PHIL_FFPE20	GPL14951	Bladder tumor	Homo sapiens	T3N0M0											total RNA
GSM1174006	PHIL_FFPE21	GPL14951	Bladder tumor	Homo sapiens	T4N0M0											total RNA
GSM1174007	PHIL_FFPE22	GPL14951	Bladder tumor	Homo sapiens	T4aN0M0											total RNA
GSM1174008	PHIL_FFPE23	GPL14951	Bladder tumor	Homo sapiens	T4AN0M0											total RNA
GSM1174009	PHIL_FFPE24	GPL14951	Bladder tumor	Homo sapiens	T3N0M0											total RNA
GSM1174010	PHIL_FFPE25	GPL14951	Bladder tumor	Homo sapiens	T2N0M0											total RNA
GSM1174011	PHIL_FFPE26	GPL14951	Bladder tumor	Homo sapiens	T3N0M0											total RNA
GSM1174012	PHIL_FFPE27	GPL14951	Bladder tumor	Homo sapiens	T2N0M0											total RNA
GSM1174013	PHIL_FFPE28	GPL14951	Bladder tumor	Homo sapiens	T2N0M0											total RNA
GSM1174014	PHIL_FFPE29	GPL14951	Bladder tumor	Homo sapiens	T2N0M0											total RNA
GSM1174015	PHIL_FFPE30	GPL14951	Bladder tumor	Homo sapiens	T2N0M0											total RNA
GSM1174016	PHIL_FFPE31	GPL14951	Bladder tumor	Homo sapiens	T2N0M0											total RNA
GSM1174017	PHIL_FFPE32	GPL14951	Bladder tumor	Homo sapiens	T3N0M0											total RNA
GSM1174018	PHIL_FFPE33	GPL14951	Bladder tumor	Homo sapiens	T4aN1M0											total RNA
GSM1174019	PHIL_FFPE34	GPL14951	Bladder tumor	Homo sapiens	T3N0M0											total RNA
GSM1174020	PHIL_FFPE35	GPL14951	Bladder tumor	Homo sapiens	T3N0M0											total RNA
GSM1174021	PHIL_FFPE36	GPL14951	Bladder tumor	Homo sapiens	T3N0M0											total RNA
GSM1174022	PHIL_FFPE37	GPL14951	Bladder tumor	Homo sapiens	T2N0M0											total RNA
GSM1174023	PHIL_FFPE38	GPL14951	Bladder tumor	Homo sapiens	T4aN0M0											total RNA
GSM1174024	PHIL_FFPE39	GPL14951	Bladder tumor	Homo sapiens	T2N0M0											total RNA
GSM1174025	PHIL_FFPE40	GPL14951	Bladder tumor	Homo sapiens	T4aN0M0											total RNA
GSM1174026	PHIL_FFPE41	GPL14951	Bladder tumor	Homo sapiens	T3N0M0											total RNA
GSM1174027	PHIL_FFPE42	GPL14951	Bladder tumor	Homo sapiens	T3N0M0											total RNA
GSM1174028	PHIL_FFPE43	GPL14951	Bladder tumor	Homo sapiens	T1N0M0											total RNA

## Sheet: Clinical of GSE69795
accession	title	platform	source	organism	survival	Cause of death	os censor	sample procured	treatment	subtype (tur_surgery)1-basal;2-p53 like;3-luminal	subtype (tur) 1-basal;2-p53 like;3-luminal	age at registration	ps at registration	cystectomy	cstage	lvi	pstage	molecule	comments	pretreatment sample record-pair
GSM1709066	GSM1173968	GPL14951	BLADDER	Homo sapiens	14.09	DOD	Uncensored	TUR	none	2	2	65	1	Yes	3	Yes	4	total RNA
GSM1709067	GSM1173969	GPL14951	BLADDER	Homo sapiens	34.66	DOD	Uncensored	TUR	none	2	2	64	0	Yes	2	Yes	4	total RNA
GSM1709068	GSM1173970	GPL14951	BLADDER	Homo sapiens	30.95	DOD	Uncensored	TUR	none	3	3	69	1	Yes	3	Yes	4	total RNA
GSM1709069	GSM1173971	GPL14951	BLADDER	Homo sapiens	46.49	ANED	Censored	TUR	none	1	1	63	1	Yes	3	None	0	total RNA
GSM1709070	GSM1173972	GPL14951	BLADDER	Homo sapiens	52.24	ANED	Censored	TUR	none	1	1	60	1	Yes	2	Yes	0	total RNA
GSM1709071	GSM1173973	GPL14951	BLADDER	Homo sapiens	8.25	DOD	Uncensored	TUR	none	3	2	72	0	Yes	3	Yes	4	total RNA
GSM1709072	GSM1173974	GPL14951	BLADDER	Homo sapiens	44.85	DOD	Uncensored	TUR	none	2	2	74	1	Yes	3	None	4	total RNA
GSM1709073	GSM1173975	GPL14951	BLADDER	Homo sapiens	58.09	ANED	Censored	TUR	none	2	2	62	1	Yes	3	None	0	total RNA
GSM1709074	GSM1173976	GPL14951	BLADDER	Homo sapiens	37.59	DOD	Uncensored	TUR	none	2	2	68	0	Yes	2	Yes	3	total RNA
GSM1709075	GSM1173977	GPL14951	BLADDER	Homo sapiens	50.53	ANED	Censored	TUR	none	3	3	76	0	Yes	3	None	0	total RNA
GSM1709076	GSM1173978	GPL14951	BLADDER	Homo sapiens	58.81	ANED	Censored	TUR	none	1	1	65	1	Yes	3	None	0	total RNA
GSM1709077	GSM1173979	GPL14951	UTUC	Homo sapiens	11.24	DOD	Uncensored	TUR	none	2	2	69	1	Upper tract	3	None	4	total RNA
GSM1709078	GSM1173981	GPL14951	BLADDER	Homo sapiens	11.93	DOD	Uncensored	TUR	none	2	2	62	0	Yes	3	None	4	total RNA
GSM1709079	GSM1173982	GPL14951	URETHRA	Homo sapiens	36.76	ANED	Censored	TUR	none	2	2	69	0	Yes	3	None	0	total RNA
GSM1709080	GSM1173983	GPL14951	BLADDER	Homo sapiens	30.88	DOD	Uncensored	TUR	none	3	3	55	0	Yes	3	None	3	total RNA
GSM1709081	MDA_FFPE84	GPL14951	BLADDER	Homo sapiens	39.98	ANED	Censored	TUR	none	3	3	61	0	Yes	3	None	0	total RNA
GSM1709082	MDA_FFPE85	GPL14951	BLADDER	Homo sapiens	43.93	ANED	Censored	TUR	none	1	1	59	0	Yes	3	Yes	0	total RNA
GSM1709083	MDA_FFPE86	GPL14951	BLADDER	Homo sapiens	48.2	ANED	Censored	TUR	none	2	2	64	0	Yes	1	None	3	total RNA
GSM1709084	MDA_FFPE87	GPL14951	BLADDER	Homo sapiens	66.6	ANED	Censored	TUR	none	2	2	56	0	Yes	3	Yes	1	total RNA
GSM1709085	MDA_FFPE88	GPL14951	BLADDER	Homo sapiens	61.86	ANED	Censored	TUR	none	1	1	65	0	Yes	3	None	4	total RNA
GSM1709086	MDA_FFPE89	GPL14951	BLADDER	Homo sapiens	66.04	ANED	Censored	TUR	none	2	2	71	0	Yes	1	None	TisN0	total RNA
GSM1709087	MDA_FFPE90	GPL14951	UTUC	Homo sapiens	50.04	ANED	Censored	TUR	none	3	3	72	1	Upper tract	3	None	0	total RNA
GSM1709088	MDA_FFPE91	GPL14951	BLADDER	Homo sapiens	37.98	ANED	Censored	TUR	none	1	1	61	0	Yes	2	Yes	TisN0	total RNA
GSM1709089	MDA_FFPE92	GPL14951	BLADDER	Homo sapiens	18.37	DOD	Uncensored	TUR	none	3	2	77	0	Yes	1	Yes	3	total RNA
GSM1709090	MDA_FFPE93	GPL14951	BLADDER	Homo sapiens	15.57	DOD	Uncensored	TUR	none	3	3	68	1	No	2	Yes	4*	total RNA	Developed lung cancer during treatment, count as pstage 4 treatment failure.
GSM1709091	MDA_FFPE94	GPL14951	BLADDER	Homo sapiens	53.91	ANED	Censored	TUR	none	2	2	42	0	Yes	2	Yes	TisN0	total RNA
GSM1709092	MDA_FFPE95	GPL14951	BLADDER	Homo sapiens	18.04	DOD	Uncensored	TUR	none	1	1	79	1	Yes	3	Yes	4	total RNA
GSM1709093	MDA_FFPE96	GPL14951	BLADDER	Homo sapiens	52.3	ANED	Censored	TUR	none	1	1	57	0	Yes	3	None	2	total RNA
GSM1709094	MDA_FFPE97	GPL14951	BLADDER	Homo sapiens	43.4	ANED	Censored	TUR	none	3	1	80	0	Yes	3	Yes	2	total RNA
GSM1709095	MDA_FFPE98	GPL14951	BLADDER	Homo sapiens	46.82	ANED	Censored	TUR	none	3	3	68	0	Yes	2	None	TisN0	total RNA
GSM1709096	MDA_FFPE99	GPL14951	BLADDER	Homo sapiens	30.88	DOD	Uncensored	TUR	none	2	2	65	0	Yes	3	None	3	total RNA
GSM1709097	MDA_FFPE100	GPL14951	BLADDER	Homo sapiens	22.08	DOD	Uncensored	TUR	none	2	2	58	2	Yes	3	Yes	4	total RNA
GSM1709098	MDA_FFPE101	GPL14951	UTUC	Homo sapiens	57.76	ANED	Censored	TUR	none	3	3	72	1	Upper tract	3	None	1	total RNA
GSM1709099	MDA_FFPE102	GPL14951	UTUC	Homo sapiens	54.05	ANED	Censored	TUR	none	3	3	62	0	Upper tract	HG upper tract	None	TaN0	total RNA
GSM1709100	MDA_FFPE103	GPL14951	UTUC	Homo sapiens	57.23	ANED	Censored	TUR	none	3	3	59	0	Upper tract	3	None	Ta N0	total RNA
GSM1709101	MDA_FFPE104	GPL14951	BLADDER	Homo sapiens	43.79	ANED	Censored	TUR	none	1	1	70	1	Yes	3	Yes	4	total RNA
GSM1709102	MDA_FFPE105	GPL14951	BLADDER	Homo sapiens	38.31	ANED	Censored	TUR	none	1	1	73	0	Yes	3	None	2	total RNA
GSM1709103	MDA_FFPE106	GPL14951	BLADDER	Homo sapiens	59.79	ANED	Censored	TUR	none	3	3	56	0	Yes	3	None	1	total RNA
GSM1709104	MDA_FFPE107	GPL14951	BLADDER	Homo sapiens				surgery	DDMVAC and bevacizumab	3								total RNA		GSM1173968
GSM1709105	MDA_FFPE108	GPL14951	BLADDER	Homo sapiens				surgery	DDMVAC and bevacizumab	2								total RNA		GSM1173969
GSM1709106	MDA_FFPE109	GPL14951	UTUC	Homo sapiens				surgery	DDMVAC and bevacizumab	2								total RNA		MDA_FFPE101
GSM1709107	MDA_FFPE110	GPL14951	BLADDER	Homo sapiens				surgery	DDMVAC and bevacizumab	2								total RNA		GSM1173981
GSM1709108	MDA_FFPE111	GPL14951	BLADDER	Homo sapiens				surgery	DDMVAC and bevacizumab	2								total RNA		GSM1173976
GSM1709109	MDA_FFPE112	GPL14951	UTUC	Homo sapiens				surgery	DDMVAC and bevacizumab	2								total RNA		MDA_FFPE103
GSM1709110	MDA_FFPE113	GPL14951	BLADDER	Homo sapiens				surgery	DDMVAC and bevacizumab	1								total RNA		MDA_FFPE104
GSM1709111	MDA_FFPE114	GPL14951	UTUC	Homo sapiens				surgery	DDMVAC and bevacizumab	3								total RNA		GSM1173979
GSM1709112	MDA_FFPE115	GPL14951	BLADDER	Homo sapiens				surgery	DDMVAC and bevacizumab	2								total RNA		MDA_FFPE94
GSM1709113	MDA_FFPE116	GPL14951	UTUC	Homo sapiens				surgery	DDMVAC and bevacizumab	3								total RNA		MDA_FFPE102
GSM1709114	MDA_FFPE117	GPL14951	BLADDER	Homo sapiens				surgery	DDMVAC and bevacizumab	1								total RNA		GSM1173970
GSM1709115	MDA_FFPE118	GPL14951	BLADDER	Homo sapiens				surgery	DDMVAC and bevacizumab	2								total RNA		GSM1173973
GSM1709116	MDA_FFPE119	GPL14951	BLADDER	Homo sapiens				surgery	DDMVAC and bevacizumab	2								total RNA		MDA_FFPE96
GSM1709117	MDA_FFPE120	GPL14951	BLADDER	Homo sapiens				surgery	DDMVAC and bevacizumab	2								total RNA		MDA_FFPE92
GSM1709118	MDA_FFPE121	GPL14951	BLADDER	Homo sapiens				surgery	DDMVAC and bevacizumab	3								total RNA		MDA_FFPE100
GSM1709119	MDA_FFPE122	GPL14951	BLADDER	Homo sapiens				surgery	DDMVAC and bevacizumab	2								total RNA		MDA_FFPE91
GSM1709120	MDA_FFPE123	GPL14951	BLADDER	Homo sapiens				surgery	DDMVAC and bevacizumab	2								total RNA		MDA_FFPE106
GSM1709121	MDA_FFPE124	GPL14951	BLADDER	Homo sapiens				surgery	DDMVAC and bevacizumab	1								total RNA		MDA_FFPE95
GSM1709122	MDA_FFPE125	GPL14951	BLADDER	Homo sapiens				surgery	DDMVAC and bevacizumab	2								total RNA		GSM1173974
GSM1709123	MDA_FFPE126	GPL14951	BLADDER	Homo sapiens				surgery	DDMVAC and bevacizumab	1								total RNA		MDA_FFPE99
GSM1709124	MDA_FFPE127	GPL14951	BLADDER	Homo sapiens				surgery	DDMVAC and bevacizumab	2								total RNA		MDA_FFPE89
GSM1709125	MDA_FFPE128	GPL14951	BLADDER	Homo sapiens				surgery	DDMVAC and bevacizumab	2								total RNA		MDA_FFPE87
GSM1709126	MDA_FFPE129	GPL14951	BLADDER	Homo sapiens				surgery	DDMVAC and bevacizumab	2								total RNA		MDA_FFPE88
