# Supplementary material for: WITHDRAWN: Analysis of Autophagy-Related Signatures in The Tumor Immune Microenvironment and Identification of Clinical Prognostic Markers in Bladder Carcinoma
Source: Research Square preprint supplement (doi:10.21203/rs.3.rs-1187613/v1), 2021-12-29
Supplement: Supplementary file 3 [file 4adb78e0de262c55bb6bb95a.xlsx]

## Sheet: Sheet1
	logFC	AveExpr	t	P.Value	adj.P.Val	B
APOL1	356.863073773125	153.719507223607	25.5876641555613	1.1588580427481299e-85	2.22570275690206e-81	175.353357284694
APOL2	39.3187894781284	30.306210504489304	16.7598579524824	6.11568422941272e-48	5.872891565505039e-44	94.9424991229002
SDCBP2	14.204804066213802	14.3828656011129	8.83419120640844	3.41143661280585e-17	2.1840017195183e-13	28.0202458688311
C10orf99	107.20661575977199	67.2566016023367	7.99178043158247	1.4981776636938297e-14	7.193500052225929e-11	22.2564679244118
WNT7B	11.9421542896155	16.446888837751	7.6226222213239	1.88834454044469e-13	7.25350904875615e-10	19.859012834351102
FXYD3	120.68933551422501	193.624943451436	7.495900466533639	4.4192723964957704e-13	1.4146090941182999e-09	19.0550925536417
ABHD17C	7.88439199785283	15.5986832208536	7.26089090717113	2.0813847545361103e-12	5.710725085088629e-09	17.5907388092398
PROM2	28.351412186774898	43.6039922604979	7.21776772672448	2.75520051657181e-12	6.614547640159771e-09	17.3258404062498
SMAD3	9.437170688139199	15.6639022104254	7.14208647581249	4.49396674284848e-12	9.2964115822897e-09	16.8638333692413
TMPRSS4	22.304720922529803	20.8199821612215	7.130548563745969	4.8403684173121396e-12	9.2964115822897e-09	16.793723584275803
CTSE	64.2116463878897	23.0550763649752	7.01364680536811	1.0220001556388801e-11	1.78441227174548e-08	16.088260367795
HS3ST1	3.78174894398881	4.303137369703101	6.82825660268399	3.28093565581687e-11	5.2511375171349e-08	14.9879437945851
MST1R	6.78166026933959	8.27824931577053	6.76951190258512	4.72485880460951e-11	6.98043370779464e-08	14.644069855048
ID1	180.053603354408	228.360732387234	6.72660842365787	6.157686945863579e-11	8.44746682016114e-08	14.394395383816303
FAM174B	16.2212909070501	18.931130093009898	6.58017370954463	1.506113496086e-10	1.85062846284465e-07	13.5516518834419
WDR72	4.72988390817104	5.475466642834129	6.57631633930179	1.54170860176582e-10	1.85062846284465e-07	13.529650817276302
SEMA4B	28.4190407564185	40.652541298421504	6.501557534758331	2.41945440963311e-10	2.73341419949491e-07	13.105280285396303
UBA7	7.27098042508098	15.663424158635399	6.45741018987478	3.1513079460022397e-10	3.3624455783843896e-07	12.8564947010971
SPOCD1	7.120271882429769	5.50636660043028	6.369587051651	5.30919970471911e-10	5.06189820976318e-07	12.365623195199802
TMEM51	12.458056271340698	27.44485094923	6.36487977305118	5.45888734853469e-10	5.06189820976318e-07	12.339465326154698
SDC1	216.333689833909	416.843437661025	6.36254302925958	5.53472156643897e-10	5.06189820976318e-07	12.3264860636849
RTP4	6.153097009043179	9.258036532402919	6.303633491023031	7.82682881826351e-10	6.83282155834405e-07	12.000548514919801
EFNB1	21.989089655465303	38.0596663050561	6.218166805378469	1.2882360474133e-09	1.07531603854899e-06	11.5320419149111
ANXA10	31.8507604370898	19.2279677940555	6.2108919476615	1.34372513408184e-09	1.07531603854899e-06	11.4924029949792
FAM110C	6.69822979892282	11.4359301693079	6.16489151738011	1.75280950089063e-09	1.3465783709642098e-06	11.2426335943116
PLXNB3	2.70280361960704	3.30720091280438	6.133697427922599	2.09714036985517e-09	1.54914145936301e-06	11.0741212499521
MOB3C	1.92814354035104	6.034582300282169	6.05155764073882	3.3516605746005398e-09	2.29899974984921e-06	10.6337497464441
PLCH2	3.92126272375844	4.114201146566391	6.00401587725004	4.38672458823866e-09	2.9052218083348898e-06	10.3810984173483
INPP1	5.405435656640449	9.48689596000898	5.9742806689092305	5.18652761106044e-09	3.32041497660089e-06	10.223912473332
SYTL1	12.274357353168199	21.7001540826057	5.96679744644392	5.40925028520083e-09	3.35129228959894e-06	10.184456334425802
RHEX	5.02940186023375	3.05967423043275	5.941672008899139	6.22753511258904e-09	3.73768873038703e-06	10.0522790531891
NSG1	6.827466844312269	5.489853633369809	5.90722289539096	7.548631485101809e-09	4.393303524329251e-06	9.871804375465972
SH3BP1	7.0940479076016	15.975336250434301	5.885472945715519	8.519678442560121e-09	4.8126160049355796e-06	9.758307847163948
GSDMB	6.8486413934023	9.43950445344241	5.866756172228321	9.452067927970849e-09	5.18675476070309e-06	9.66091790092816
CSTB	136.332303022688	261.784579778116	5.80066411475111	1.3610946289405302e-08	7.1862206945199705e-06	9.31908720151079
ETV7	4.93160289627084	7.587162869634071	5.7967222789637995	1.3908762012561002e-08	7.1862206945199705e-06	9.29880207364209
SSH3	28.1674021274957	50.6052682018997	5.7927117667650405	1.4218285243765402e-08	7.1862206945199705e-06	9.278175362880472
CIB1	41.565867472456205	119.987761346444	5.74385864057095	1.8572251147508703e-08	9.146119372796221e-06	9.027875737176279
PRXL2A	14.3085854458044	27.553274653436798	5.73720969802221	1.9257256932613603e-08	9.24637191619442e-06	8.99394719994419
ANKRD50	4.47810228958559	6.8488318002637305	5.7194317843626	2.12120174148116e-08	9.74648134859195e-06	8.903391274037439
BAK1	8.71115985935702	21.159458662318603	5.7185506979040195	2.1313767397733102e-08	9.74648134859195e-06	8.898909395357421
CDKN1A	40.5319425152818	83.4683031065953	5.70265489062914	2.3233281158095497e-08	1.03771720447066e-05	8.818150872865198
MR1	1.91754413221077	4.98389368012729	5.68711393590966	2.5272305292978702e-08	1.10313612603852e-05	8.7393779897678
GPR39	1.3483238048706299	2.0239333776764	5.679215837256451	2.6374345601680602e-08	1.12565707027973e-05	8.69941402330305
KIZ	2.1595758016905	4.28652161059449	5.6739802994863	2.7130526366660202e-08	1.13275845521321e-05	8.6729482578043
LAD1	49.65627046994761	104.883325923091	5.66600673479432	2.83228996254049e-08	1.1573821493734599e-05	8.6326812179466
AIG1	3.9909375231473	9.65766724880286	5.6506029056171	3.07726422171337e-08	1.23129034671306e-05	8.555026059032759
EGLN3	7.65478991691186	11.036054193832701	5.63882176375337	3.27843319140415e-08	1.28501199743078e-05	8.49575430115352
ADGRF1	4.9558621706999	5.255552961605691	5.6291308595516805	3.45345868522283e-08	1.3265425501677901e-05	8.44707697834869
KCTD11	8.760080290768219	15.3934636461781	5.60735075865258	3.88067483476475e-08	1.4508185687077899e-05	8.337933990529232
LPCAT4	8.216187272494441	17.783702835364803	5.605079882429821	3.92807276751043e-08	1.4508185687077899e-05	8.32657492593399
PML	3.7798102685410804	9.46677036594909	5.5920687359997405	4.21070253874736e-08	1.5258632633807901e-05	8.26156743218683
TRIM69	2.03150703465149	4.9401980633403895	5.5877939184774394	4.3078084573981e-08	1.53214387468126e-05	8.24023710881145
DUOXA2	14.627277647838099	6.252767808440059	5.55458446546803	5.1401307292626696e-08	1.7949336506585198e-05	8.075000791896489
CA12	14.6555072357391	17.7349333414764	5.53389443577813	5.73569419775237e-08	1.96713826360771e-05	7.97247850058642
DUOX1	3.7436404058128194	6.47997954328138	5.4908775697865995	7.19650294693709e-08	2.4248427298048e-05	7.76036476761237
LEO1	2.52865483239303	11.1236505613961	5.45396009731812	8.73362835459303e-08	2.8920356237640302e-05	7.57945152693153
PSME1	41.229203034176	133.868485803851	5.441821160850759	9.305501092567689e-08	3.02917718616703e-05	7.5201925060255395
DUOX2	12.1894754738096	8.14088980958661	5.3930032273523	1.19954793295735e-07	3.75606971165976e-05	7.28301683807423
SERINC2	77.80524656629929	158.15409986482598	5.39211854695059	1.2050600976549e-07	3.75606971165976e-05	7.278735611333411
FAM110A	5.512728307414299	17.8222637744554	5.38889956243796	1.22532494913266e-07	3.75606971165976e-05	7.263163083988969
C16orf74	7.09087935231524	13.4519823984221	5.387838761845289	1.2320753505913e-07	3.75606971165976e-05	7.25803297948019
FAAH2	1.70725716911405	4.188457356948899	5.36799066683887	1.36524549567835e-07	4.09701640468726e-05	7.16220590898434
SLC9A1	7.23568765849828	19.7975972810741	5.35919727116535	1.42861789551896e-07	4.22123620020571e-05	7.1198481746610796
CASP8	1.26483840252649	4.402221574709481	5.3522323784049295	1.48083083028638e-07	4.3092177161333706e-05	7.086340635599821
ABL1	-3.7481986642192	13.299733803026099	-5.33701961538017	1.60139739849251e-07	4.59051319932048e-05	7.0132834212388095
TNK1	2.16720807330669	6.05868400154283	5.3290563908969	1.6682544525502999e-07	4.7118375023060293e-05	6.97511238750687
CLCA4	20.670156958185803	15.395544646803101	5.2880433546990195	2.05783079407202e-07	5.64609974727818e-05	6.77929691367435
ADAM28	1.2172559577787299	1.27836426738395	5.25942813665571	2.3804981396066297e-07	6.43941510835e-05	6.643446815061599
TUBG2	4.2512222305614005	9.15560175129585	5.24321150080949	2.5846049735239895e-07	6.89443376687525e-05	6.5667412060400405
GIPC1	14.760006947256999	55.289025489675396	5.23714493842359	2.6652400367996395e-07	6.95636174539415e-05	6.538098623061511
SH2D4A	4.5677931412967805	9.80688871050356	5.2360345934562895	2.68026017473272e-07	6.95636174539415e-05	6.532859358632161
MGST2	9.578149385373221	24.235350687972698	5.21027270648854	3.0527147432455e-07	7.70948081218952e-05	6.41156932864614
PSMB8	28.188949680209397	59.455601441919406	5.20728671318075	3.09899948276389e-07	7.70948081218952e-05	6.397544397743911
NDFIP1	3.40457642077562	17.2437726259395	5.2058945473542595	3.12081069699275e-07	7.70948081218952e-05	6.39100790450857
CNDP2	5.659149253188361	17.7493238704259	5.2052475310530495	3.13099814303229e-07	7.70948081218952e-05	6.387970550414231
DGKA	3.8451885065321805	8.982564086805551	5.19281855870782	3.33306877418322e-07	8.103154288223159e-05	6.329687442429121
TBC1D16	-1.51276562157965	3.92680226937169	-5.18441841153163	3.47673569644385e-07	8.34677322323757e-05	6.29036505655201
DBN1	-9.89708486249448	18.1517225963153	-5.18048419916637	3.5460681038342206e-07	8.39870125155027e-05	6.2719673772463
STYK1	1.5996364045312	3.79185565582941	5.17826172806821	3.5858247559467e-07	8.39870125155027e-05	6.2615797196169005
ANKRA2	1.5725361501277102	5.218702878875099	5.15641056755448	4.00042000926584e-07	9.256875505778291e-05	6.15965503413376
PSMB10	10.4328111687068	24.758894061894498	5.15372877239534	4.0543953548837105e-07	9.2700853792734e-05	6.147171583588741
IL9R	1.3261205872538502	1.34671142292681	5.11209674696311	4.988484505438661e-07	0.00011271627460171201	5.9541033374130405
PNMA1	-5.99380676397896	12.5533863286904	-5.1093148626539096	5.057830208691749e-07	0.00011295428719550401	5.941250921444401
HSD17B2	5.2993481519989	5.41533317609392	5.10369343080035	5.20081836872277e-07	0.000114812548953666	5.915298271763179
SMIM22	23.3173810379635	31.7802236203529	5.092039663945781	5.50981666307452e-07	0.000120251748671601	5.86157520572717
SOGA1	-1.43530201340899	4.10779234706729	-5.08743811443112	5.63665660470591e-07	0.000121637782865148	5.84039184502701
TNFAIP2	71.60915914019529	122.285093724336	5.0801936070918305	5.84209432336543e-07	0.000123571752353717	5.80707538385895
PSMA4	4.97406351148992	23.436397203617602	5.07974827715308	5.854956505356789e-07	0.000123571752353717	5.80502872502612
SH3PXD2B	-2.7559323866375602	6.974985184679969	-5.075716883936081	5.97264631047343e-07	0.000124685483737992	5.78650826266506
CLIC4	-15.224043359217301	30.295877289593502	-5.07126540531421	6.105259071503961e-07	0.000126083447018608	5.76607280098382
TSPO	55.4075993358136	148.620191470668	5.06384469447053	6.332685017264149e-07	0.000129388881320825	5.7320412191370895
TNS4	19.8025390920661	35.3204246595702	5.06016370736763	6.44851798514261e-07	0.000130368669918578	5.71517624840052
TNFRSF14	4.35805720928824	11.0269619418755	5.0533882074524294	6.667109846678541e-07	0.000133383866370113	5.6841613117268395
AIM2	10.869374612302801	11.895696990890999	5.047129363855049	6.87538995716924e-07	0.000136132721151951	5.6555436184892205
GBP2	12.868766338595801	28.375221728495102	5.04335683114207	7.00395661361708e-07	0.000137263255837887	5.6383092000090995
ZBTB7A	2.5612925590914304	11.7491755300367	5.02918065315391	7.50818417405058e-07	0.000145658772976581	5.573647495551049
RNF149	4.52723988305288	19.5047235175178	5.0170070453367	7.969046100609909e-07	0.000153053499408314	5.518247116394839
PLEKHH3	4.43121023063124	12.677604020773899	4.99234955475244	8.98777901744829e-07	0.00017091018198922	5.40639442557608
ARAP3	2.57767155471124	6.493742205230781	4.98252183473638	9.42795955193697e-07	0.000177522932504413	5.36194791304733
ALOX5	13.934071022890999	24.995954615535897	4.97022091791563	1.00083348421607e-06	0.000186621435901493	5.30642439634684
CTDSP1	6.81248029378384	29.526094303865104	4.9447012773232695	1.1324507455206999e-06	0.000207141419223529	5.19161869071262
FAM174A	3.44555986514325	13.1986359631233	4.9380083028329995	1.16964674146187e-06	0.000211926748269025	5.16159477410908
GJB4	3.98164557041813	5.5175255768038705	4.932334718767599	1.202099142419e-06	0.000215771178778498	5.13617170769891
CDC42EP5	19.727229994547997	27.579637245012396	4.92220706575076	1.26220240992378e-06	0.00022240238059629503	5.09085402371465
REEP5	7.94206913722342	39.3001733245409	4.91874399161718	1.28341226581997e-06	0.000223269113308617	5.0753767758614
TOLLIP	4.2086084105487105	15.234201396675802	4.90540581020141	1.36836425182584e-06	0.00023465003411220602	5.01585500987542
VAT1	-17.6620620273058	69.798930791852	-4.90224134800933	1.38930185084451e-06	0.000236132135816989	5.00175444036055
TMEM30B	5.94439707574467	14.6309375946844	4.89769878400926	1.41989907559301e-06	0.00023713549257251698	4.981527170149019
SNX1	2.0401449452236298	11.0178132165098	4.8908320163011	1.4673895301450898e-06	0.00024295416651695298	4.950981958190781
PKM	67.3082700882683	207.572240018651	4.88513029069466	1.50798418960166e-06	0.000247541404662304	4.92564784736379
ZNF385A	23.5779270547368	42.0763023695569	4.87494543883222	1.58321007275608e-06	0.000255593426209803	4.88045895065487
CARD6	1.7646075170506499	4.51313731887214	4.874887015164	1.58365186498837e-06	0.000255593426209803	4.88019997201723
NDUFAF1	1.8454946887625199	8.7088749582052	4.8700477172640895	1.6206619619350202e-06	0.0002593869470077	4.8587579811076305
GPRC5C	6.5389364047572895	11.665130016096	4.835087466142401	1.9139456640335498e-06	0.000301305249372363	4.70441413925013
ST3GAL2	-1.1689090223946499	3.0245296221360203	-4.83273233462881	1.9354442069970698e-06	0.000301337553848792	4.69405191308438
CAPNS2	15.338906631041999	20.8197567693088	4.831636090806441	1.94553039035979e-06	0.000301337553848792	4.68923012546694
CHADL	1.2206626605413602	2.25346323046075	4.81929679606838	2.06261415244269e-06	0.00031589867776565095	4.635022875465411
KCTD10	-1.39453188894227	7.11081995253272	-4.818292456177129	2.07243743613829e-06	0.00031589867776565095	4.6306161430760495
PLA2G4F	2.13007872871454	3.58720837103042	4.815386039618041	2.10111942458886e-06	0.000316382983573842	4.61786826238486
MAP3K3	-1.30482631099449	4.9461203677144905	-4.8146382199969295	2.10856096519066e-06	0.000316382983573842	4.61458933871366
CASP10	1.0661781164166	2.8246433601994596	4.79909147923163	2.26914699035915e-06	0.00033783904726230896	4.546524424887799
DDR1	13.4591805112046	42.9252386278295	4.79148437955612	2.3519563142794898e-06	0.00034512260983248	4.513290895269639
KRT19	444.295043070262	1223.9666295546401	4.791299275438809	2.3540071794259603e-06	0.00034512260983248	4.5124828029465895
CATSPER1	1.56163037998503	1.4135681232829898	4.78874785320472	2.38245192407001e-06	0.000346646754952186	4.50134710547047
SGO1	-1.1273088348136397	2.78067309057154	-4.7793168114682505	2.4904975734727995e-06	0.000359642830046004	4.46023086119811
ARHGEF17	-1.39953619318531	3.79602399659429	-4.77591983575374	2.53055924006758e-06	0.000362000656702915	4.44543875076967
KLF5	35.1427776368895	85.8424517310943	4.774629035517191	2.545944287384e-06	0.000362000656702915	4.43982041196355
VEGFA	10.6643535953083	19.8032114366828	4.773176048366009	2.56337026510447e-06	0.000362000656702915	4.43349774806387
DENND2A	-1.0709805268328199	1.67887399797725	-4.76212556539894	2.69971346267107e-06	0.00037788059778490603	4.385467459187
SLC44A3	6.44840656064149	15.5276275098881	4.7609070671858404	2.7151683064832296e-06	0.00037788059778490603	4.38017736782964
PSME2	19.6219533993222	55.93224969594149	4.75511818107523	2.7897635019683996e-06	0.00038546904905615095	4.3550614066617
LIX1L	-2.6343506151342497	6.30770823380048	-4.74397206177599	2.93898908852267e-06	0.000403187317386902	4.306778621084891
APOL4	9.68322860282774	14.3041960125643	4.73590442764247	3.0517646097641703e-06	0.000410534529917945	4.27189395826705
WDR61	1.08497591690455	5.798454469599039	4.735774873334201	3.05360918018414e-06	0.000410534529917945	4.27133419201844
MAPKAP1	-2.08324768399102	11.6451218669204	-4.73555993804058	3.05667175769375e-06	0.000410534529917945	4.2704055495075295
TNFRSF21	56.567995737340205	124.93663412949199	4.73309384861463	3.09202299196364e-06	0.000412398566553151	4.25975332072805
PRICKLE3	1.7776322827766	6.895118095680809	4.71770211434623	3.32172257721994e-06	0.000436965779575932	4.19338037545935
MPZL2	17.4879245798505	45.0714702206929	4.71149589492061	3.4189147984511e-06	0.000446691684483346	4.16667197563082
BATF	11.313651963551	24.7248824301124	4.708075678659469	3.47364097791106e-06	0.00045077532852540403	4.151966468059229
FGD5	2.21136905554184	2.54156721237706	4.70237801709448	3.56668537733209e-06	0.00045667839571360096	4.12748997640854
TRIM65	-2.12605476977637	8.832202080796039	-4.7002638023830805	3.6018175397788597e-06	0.00045812256734432304	4.11841426051215
GNA15	10.592516243885902	31.255291880254003	4.69494621382767	3.6916590381247498e-06	0.00046646054925147305	4.09560342981552
SNX14	1.7735863965599599	8.25436314255129	4.68946258800294	3.7865627923451697e-06	0.00047532499993321203	4.0721044098055605
TRIOBP	1.0568418704945202	3.71293777187607	4.68059457320135	3.94502678062404e-06	0.000488361506063947	4.03415396786919
ALS2CL	5.1860640693165	11.014284038466899	4.67950665665468	3.96490077863162e-06	0.000488361506063947	4.0295026604666795
RNF216	-1.5792010193743402	7.18643107946206	-4.679408553769821	3.9666976437558995e-06	0.000488361506063947	4.029083276093671
TMC4	14.6900668431138	36.209147559173495	4.67065930304041	4.1301396921113095e-06	0.0005052449867942031	3.9917122025690497
CALU	-13.685985667490199	43.53062003322329	-4.66244721882722	4.289427247238919e-06	0.000521409745002979	3.9566922333515095
PPIL3	1.1442356114969598	4.90181956305895	4.65692560392255	4.39983309349179e-06	0.000530816059516546	3.93317649387348
PHF20	-1.34387303901549	5.88670901575343	-4.655828882054361	4.42208526099383e-06	0.000530816059516546	3.9285086743739996
BST2	105.994327168464	194.67161384948102	4.65201802331392	4.50025099883106e-06	0.000534906589719109	3.9122966839110203
PYGL	14.227904394748599	33.7701093358808	4.6446491892568	4.65518062875945e-06	0.0005444955898191	3.8809820812431
PIGA	2.0001138439333896	5.45150240738168	4.64359326919336	4.67779716339433e-06	0.0005444955898191	3.87649846893606
TLN1	-10.1615379689376	30.858329819535605	-4.63623121043636	4.8384455556985e-06	0.000549268843268333	3.8452632154060398
GAB2	-1.82075669440839	3.36142710046207	-4.63408077346034	4.88636281802714e-06	0.000549268843268333	3.83614782852773
CLIP2	-1.90357941917965	4.640742819833481	-4.63399052916626	4.88838363473638e-06	0.000549268843268333	3.83576537870554
CYBRD1	-5.47000867686756	10.175013235630901	-4.63350266480263	4.89932217301101e-06	0.000549268843268333	3.83369795432494
ARHGEF16	2.6258671416473196	7.12761935161301	4.6304967337076794	4.9672399137526395e-06	0.000549268843268333	3.82096399602058
NEK6	-2.5389678411466403	5.9078949281904105	-4.6303851105436	4.96977934131708e-06	0.000549268843268333	3.82049127133636
GBP3	4.95021138564319	11.763306437845099	4.63010520050142	4.97615278622726e-06	0.000549268843268333	3.81930589557151
VSIG2	55.43149053082271	86.5425167246105	4.63010339898322	4.97619383154691e-06	0.000549268843268333	3.81929826662747
PARP3	2.9111425852186095	8.694425762532179	4.62786050120763	5.02754866686691e-06	0.000551766283976262	3.80980225405406
FAM3B	10.7939439005584	15.877316157919099	4.62533975851366	5.08587326262368e-06	0.000554995919783809	3.79913479946522
DDAH2	-11.4011971702761	23.975293898213895	-4.610599205598009	5.44018065881851e-06	0.000584075721091553	3.73685861505786
SZRD1	-4.485836897867809	30.7538505626301	-4.61046197053741	5.44358815346183e-06	0.000584075721091553	3.7362796558239504
GPX2	131.294260026012	191.020063539361	4.60457975180391	5.59158500973805e-06	0.0005900658335001589	3.7114785700051005
MOGAT2	1.6802251085214799	1.17567606916944	4.5991927486949	5.7305081112649594e-06	0.000598152928179102	3.68879027506392
TFF1	65.401307410421	29.494548962749	4.59371806763992	5.87508717969412e-06	0.000609929320936245	3.66575703356802
FGFR3	50.2780298750296	56.9113936507755	4.5884253897242	6.018187315630099e-06	0.000621426374107483	3.64351284157605
NFIB	-1.89880230020576	3.83620567740053	-4.58121226025937	6.21861199120651e-06	0.000636674990869734	3.61323426004602
TNFRSF10B	4.63769663690013	13.705297041454001	4.57887606411943	6.28488917481384e-06	0.000636674990869734	3.60343673688183
PAX8	2.46794321049771	1.75551610446006	4.57840058126781	6.29846132798341e-06	0.000636674990869734	3.6014432078430096
FABP6	9.354203936763462	11.887723508887902	4.562595287094981	6.76597162322851e-06	0.000680352099454067	3.53528273455843
ARL4C	-7.647248077611099	16.0354904319124	-4.55005187510709	7.160536107071291e-06	0.0007088930746000571	3.48292222724868
RAPGEFL1	11.7412918522196	24.0922831681564	4.5478484747086	7.23208926235059e-06	0.000712305160885669	3.47373781284767
EPS8L3	2.2622723699639504	1.8756417947383899	4.5430632599927	7.38985570881833e-06	0.00072413045277329	3.45380537566683
ADGRA2	-2.49142818640602	4.348060993866589	-4.53415734407671	7.6923183849624e-06	0.0007499424715816651	3.4167585635172997
ADSS1	1.3294673213789	2.03412684470428	4.53267991668735	7.74363017881773e-06	0.00075113212734532	3.41061906724965
PHLDA3	16.965687111579403	49.4864092303922	4.52224106188853	8.11565073572132e-06	0.00078326225140836	3.3672912132138504
PLCD3	9.38835569012857	16.3823164149967	4.51696707204771	8.310067706670579e-06	0.000796819332567834	3.34543489881619
TGFB3	-2.76902193249404	4.70001685737028	-4.516189780613651	8.3390964201882e-06	0.000796819332567834	3.3422156055813397
TNFRSF1A	12.3122212561764	50.632910002359296	4.51376925443515	8.43011788884307e-06	0.000799627163252315	3.33219374331322
PTK6	12.5768356072875	29.4318679086649	4.51319767701203	8.451750189535561e-06	0.000799627163252315	3.3298279078933
BAIAP2L1	4.20033418316047	16.9061998173534	4.50539531767423	8.75242134213671e-06	0.000819995142912574	3.29755979451459
GPX7	-4.09792514815671	8.342439012152822	-4.503278693528889	8.83574045182642e-06	0.00082378267532902	3.2888147449070497
DYNC1LI1	-1.2296928485990901	6.31698798627683	-4.50100440102171	8.92611384728356e-06	0.0008245584196039469	3.27942238532709
SLITRK6	14.470699626879101	18.0724908747717	4.5005902202835	8.94266727275745e-06	0.0008245584196039469	3.2777123628687
RAB11A	8.83559188390623	39.6021690933566	4.4980683502870304	9.044095273886811e-06	0.0008245584196039469	3.26730340238237
ZCCHC24	-2.6994752474712	4.43014687557284	-4.497862987306769	9.052403251108211e-06	0.0008245584196039469	3.26645600214671
PRKAR2A	-2.05294395449553	8.15276692451866	-4.4966492457345995	9.1016549492886e-06	0.0008245584196039469	3.2614483851620095
KCNQ1	4.45833956075942	6.9304079335083495	4.49204465369329	9.29084928244336e-06	0.000837746719805668	3.2424619438864903
AQP3	195.458291442148	222.984804668085	4.48513296833286	9.58193399143951e-06	0.000859956188035455	3.21399531214507
SOX15	10.832594056115001	14.467192943275599	4.47625832557455	9.96852976572034e-06	0.0008904910822345339	3.1775017758547097
TSPAN14	3.0775434089076095	12.3425274470514	4.468351204659339	1.03255389913902e-05	0.0009181125086511109	3.14504155493297
HIBCH	1.20589651520394	4.12512578861171	4.46010154210984	1.07110657778989e-05	0.0009440023496721109	3.1112301687786696
FBXO17	-1.2534710751947902	1.67145952011695	-4.46001858882535	1.07150115707862e-05	0.0009440023496721109	3.11089046879451
LAMA2	-1.0065164422966701	1.65508810087974	-4.45311515166408	1.1048311268150301e-05	0.000963412522287752	3.08264029880656
JCAD	-1.83171184063263	3.38768566938825	-4.45235088622303	1.1085815236155e-05	0.000963412522287752	3.0795152019270295
GOT2	9.81451621688539	43.9360014684005	4.4438534523546105	1.15111053113437e-05	0.000995866164908409	3.0448015590056197
MSRB1	7.45337257126049	22.6558622276863	4.438910826937651	1.1765625354562699e-05	0.00101332107874319	3.0246374608518303
FAM168B	-4.0525185433716695	16.787472306603302	-4.43399919302301	1.20238856703736e-05	0.0010309408401124802	3.0046198215335798
TMBIM1	19.112856459031697	60.4795765567208	4.420500717408389	1.2761927387647999e-05	0.00107976025289501	2.94970889937145
INF2	4.3144207939105295	16.5976468551385	4.41714545025128	1.29520039733636e-05	0.00109103591365097	2.93608331106327
TEAD2	-7.2378724937287195	12.4597671226393	-4.41199248659944	1.32492094050863e-05	0.00111119788573837	2.9151755258787
LGALS3BP	75.402816948609	248.16808283600102	4.4095634753270705	1.3391560945557e-05	0.00111341263861631	2.9053276179980703
EPS8L1	7.45467467687961	14.388234026049302	4.39517832569316	1.4265091081789402e-05	0.00117407466630973	2.8471064016345604
GPR108	3.30966779987499	20.4996031709232	4.39454837740156	1.43045648191439e-05	0.00117407466630973	2.84456072717942
HEYL	-1.7611695970560401	3.55591421308913	-4.3817326300684	1.5130696633212302e-05	0.0012267981336971901	2.79284273841528
MAPK13	4.94900968840295	18.900873371789	4.38161391430458	1.5138558663242401e-05	0.0012267981336971901	2.79236429820781
ERCC5	1.02365593176976	4.90301078245102	4.376708567792471	1.5466858740099697e-05	0.00123538855402139	2.77260534190483
SLC15A1	3.12790727739713	3.8041635231397404	4.37555056766855	1.55453484122088e-05	0.00123538855402139	2.76794378258825
APOL3	3.6021441723188197	6.22967466059573	4.3743005643609205	1.56305018550036e-05	0.00123538855402139	2.7629131129025097
ANXA6	-9.718679347894538	17.1121823908334	-4.37172053016426	1.58076740462791e-05	0.0012418418044891901	2.75253380731777
CBL	-1.06266506070319	2.87952531274452	-4.37123155089553	1.58414684004921e-05	0.0012418418044891901	2.75056730006044
DUOXA1	3.41180969579696	7.73776188846743	4.36982832393883	1.59388325627537e-05	0.0012443951959359599	2.74492510523779
PSKH1	-2.29735821061352	8.55167279871799	-4.36502271376801	1.62766309825795e-05	0.00126190642273857	2.72561477055507
FERMT2	-2.34646985343329	3.92984848085207	-4.35456653255584	1.70354447762462e-05	0.00130393801672669	2.68366517359957
KCNJ8	-1.46121251561081	2.54618664314302	-4.3541818970343105	1.70639935466949e-05	0.00130393801672669	2.68212377287869
SH2D3A	2.2827846369462406	7.878482163678969	4.35355878608108	1.71103398073755e-05	0.00130393801672669	2.6796269593910296
AKT3	-1.4705814720430401	2.61505214608287	-4.35266896864963	1.7176732179103e-05	0.00130393801672669	2.67606200993872
BRPF1	-1.62988473057588	6.626905950280889	-4.34884031224033	1.74652232543436e-05	0.00132061841662568	2.66073046527639
YPEL5	6.2200415008815595	32.5312303867776	4.33886337184234	1.82389258786437e-05	0.0013630226086584901	2.6208359649040402
TMEM181	2.8219196427098705	11.384961465157401	4.3352461502081505	1.85274507143494e-05	0.0013792179008519198	2.6063923686493196
MBD2	3.147184460916	16.3942049833266	4.33420463168061	1.8611332570449697e-05	0.00138011294728979	2.60223559822156
DENND5A	-1.4249999503964401	5.01375383211275	-4.33259774417568	1.87414608430753e-05	0.00138441729596963	2.59582417570118
USP36	-1.12402585116595	6.37866764994761	-4.32744786309811	1.91643937531792e-05	0.00141023504376843	2.57529084151467
CDK18	1.9553017958575	5.31209447576124	4.32530346255759	1.93431798202886e-05	0.00141795844133001	2.5667473217369703
C1orf216	-1.34653513949206	4.92273898702524	-4.31999888423973	1.97923174396697e-05	0.00143585033624788	2.5456297952436198
GAS7	-1.20772766767352	1.92938068144822	-4.3197744907017	1.98115348904347e-05	0.00143585033624788	2.54473700201903
ST3GAL5	5.03810429440624	8.1213079157189	4.31889053718711	1.9887411871137803e-05	0.0014359309488611801	2.5412204301554597
SLC6A8	17.2806902213104	31.009708609396	4.31011344120062	2.06560495155948e-05	0.0014756444256007301	2.50633848885857
CNKSR1	3.43328852235401	12.4940776454499	4.30998019195104	2.06679345249712e-05	0.0014756444256007301	2.5058094250854905
HOMEZ	1.49981351390876	5.00825091150378	4.30155874955736	2.1432478709423e-05	0.0015244253365266	2.4724023152482597
RAB25	27.580474585984998	99.8188454589604	4.30066408619008	2.15152710088058e-05	0.0015244253365266	2.46885674601252
CXorf38	1.04359153537727	5.09448950804241	4.2995544472157095	2.16183818165695e-05	0.0015244253365266	2.4644601529839
KRT7	257.315271325797	553.5992885313719	4.29029769405623	2.24971378961883e-05	0.00157693441764304	2.42782329026894
LHFPL6	-4.881833617937629	10.19869802769	-4.28673277778381	2.2844578240610898e-05	0.00159546534432426	2.41373297997033
UNC45A	2.21506306817583	15.842800940664699	4.28274477672572	2.32393265366445e-05	0.00161715400529998	2.3979830223654903
HSPB1	336.160147364754	887.427130503364	4.28007652611213	2.3507069718422e-05	0.0016298800758556401	2.3874526300872003
BAG2	-1.13566466994955	2.3059850699652595	-4.278793823295899	2.36368276066198e-05	0.00163298169429043	2.38239249514205
RNF39	1.93795629396273	3.7131026506189597	4.27540766544053	2.39826654279601e-05	0.0016509357426860302	2.36904105271937
PDGFRB	-6.9016964662	13.3074141335348	-4.26785902987301	2.47711068133847e-05	0.00169912099092095	2.3393117175409
JUNB	66.3089524677427	206.490576599381	4.26299558795057	2.52921305165655e-05	0.00171042485458154	2.3201829413014905
HEXIM1	6.04683680170271	24.905140146574396	4.25124484486072	2.6594525925142998e-05	0.00179219110497648	2.2740469547697697
ARHGEF10L	3.0161694771222503	9.93114364902015	4.249829058551129	2.6755698838123e-05	0.0017967480835139602	2.2684960781566
IP6K1	-1.9648640029617899	9.97548703868376	-4.24696401805019	2.70847117392254e-05	0.00181250513471625	2.2572682477015498
LATS2	-1.1249169039764901	3.6824695261852995	-4.24579725458731	2.72198030007238e-05	0.0018152206126107698	2.2526977807409
S100A6	1182.1732473517	2670.56999416972	4.243671306226259	2.74676066758221e-05	0.00182540779867073	2.24437291197001
AFAP1	-1.09668480365496	3.38769059010404	-4.2397150671543695	2.79344946680966e-05	0.0018436766480943699	2.22889101109192
DPYSL2	-3.37162862161378	6.75876574956899	-4.23028219969634	2.9078447031930602e-05	0.00190607731636607	2.19203046288219
ENAH	-2.7062652108097898	8.826250872593269	-4.22639762738568	2.95624184769078e-05	0.0019312102356037102	2.1768725369216697
EML2	2.21503489397397	8.35361452906929	4.22205683552723	3.0112320094532598e-05	0.00196046515164608	2.15994939159758
ANAPC4	1.16786465627098	4.45996975812515	4.20982721526554	3.1714562804336895e-05	0.00204547747310483	2.11235571932959
SP100	1.39431807916291	5.1656602157971605	4.20965573382079	3.17375969481015e-05	0.00204547747310483	2.11168926315532
DFFA	-1.76810084149226	9.79368935582561	-4.2055270310062	3.22970235772049e-05	0.00206765544941266	2.09565067661015
ERO1A	8.176141512942412	21.7393719879826	4.2047374535419	3.24050746809859e-05	0.00206768061236882	2.0925850726768203
TLE5	25.004111797441897	91.02247103993808	4.20305699355115	3.26361889178766e-05	0.0020686819945767	2.08606228386682
OCIAD2	9.114347400709061	32.9674173907609	4.198636344887721	3.325169237353211e-05	0.00209387542205265	2.06891465624111
RNF144A	-1.3920596659752398	3.78023238109938	-4.1974629764644105	3.34169144625783e-05	0.00209740280773947	2.06436593841743
CNOT10	-1.3094794577211202	7.44077797149959	-4.1924395080244	3.4133160463259494e-05	0.0021353794132161603	2.04490489192581
LAMB2	-8.36410997452625	23.5337063190738	-4.19068010439047	3.43874592492333e-05	0.00213750168080153	2.0380939370221203
ENTPD1	-1.16334844966851	3.2842175271800502	-4.18966329182	3.45352487364821e-05	0.00213750168080153	2.0341588679112
DGLUCY	1.81118958210074	5.64332107263489	4.18958440220817	3.45467402919994e-05	0.00213750168080153	2.03385360113833
NACA	11.8569556731538	66.20169220205051	4.18913510160798	3.46122577699301e-05	0.00213750168080153	2.03211511284753
ATP1B1	25.19650135599	51.0295805217049	4.18721523175411	3.48935520612617e-05	0.00214439503652958	2.0246884339614297
MRAS	-1.26247654124624	3.0077374346585204	-4.18685085147941	3.4947185589594897e-05	0.00214439503652958	2.0232792432254403
CASP1	4.32965174805448	7.68900805952358	4.18409304898551	3.53556653258032e-05	0.0021625506632082	2.01261744424623
VIRMA	-1.3172392997903102	6.089623311157889	-4.1770431381430395	3.64206730417565e-05	0.00222062046488881	1.98539125253675
DNM2	5.6502475346860495	19.0062739767203	4.17613012651942	3.65608146695586e-05	0.00222211078020108	1.98186833597543
DQX1	1.61238711149342	2.92546843986429	4.17499231301577	3.6736181404635706e-05	0.0022257258676890604	1.97747898903646
CBX6	-3.4028315987823796	7.7893177964419404	-4.173807116742	3.69197033634311e-05	0.0022298107635159	1.97290801304427
FANCD2	-1.2635227757552099	4.00240241838184	-4.171957341464839	3.72078792822808e-05	0.00223563933696022	1.96577630341119
B3GALNT1	3.67384971713355	7.276206279625581	4.17113059283903	3.7337370189649204e-05	0.00223563933696022	1.9625897504764098
ADARB1	-1.32928648430216	2.6727792814453997	-4.17095187563892	3.73654184715313e-05	0.00223563933696022	1.96190099307931
RASSF6	1.98080470859515	3.39116462994667	4.16775305895146	3.78708569153755e-05	0.0022493827311200697	1.94957764016509
SYT8	29.727059251585	31.925401346273798	4.167633073235891	3.7889941809671296e-05	0.0022493827311200697	1.9491155662985802
BLCAP	9.01377087051085	28.5848658932832	4.15856901293684	3.9358465824069e-05	0.00232590367574483	1.9142442847600702
IRF1	6.01258009148425	13.3155067050515	4.15009708963374	4.07799551653647e-05	0.0023951676419143603	1.8817137137403699
CHST3	-1.6642554827398	3.20644269879421	-4.14652408073134	4.1394010233693704e-05	0.00241645398342955	1.8680121944348898
B3GALT4	2.54964382950733	8.48015636325221	4.14354822146353	4.19121516433014e-05	0.00243928722564014	1.85660880533832
SPAG4	4.767255942420361	10.5547130339601	4.13225206525522	4.393576501581071e-05	0.0025376386315180102	1.8133903829771998
IMP3	3.75943567389719	20.555199238708997	4.13198323816763	4.3985038308072e-05	0.0025376386315180102	1.81236317931486
IFITM10	8.796627133953141	11.6088490246192	4.13191027656383	4.39984205089814e-05	0.0025376386315180102	1.81208439939044
DHRS1	1.70728914052405	6.6905634206101	4.12529135497047	4.5228685453449e-05	0.00259069182137418	1.78681278801843
TRIM37	-1.5880060955892599	6.07288151654484	-4.12348171219531	4.5570704469538394e-05	0.00259712448083666	1.7799098607942199
NRSN2	-3.5428290014304	10.0356112928669	-4.11646806064644	4.6919677720279794e-05	0.00266609269318253	1.7531822681069198
TMC7	1.8464147042038401	3.81536838584984	4.1026340049477295	4.9692674012453703e-05	0.00280705146200937	1.70058546414249
MFAP2	-11.393419405383199	18.955726399771	-4.10162838527497	4.9900213586662e-05	0.0028105088039455397	1.6967684314676599
TSKU	11.636917411490199	24.814771087206	4.09742501743803	5.0776665815439e-05	0.00285151065395123	1.68082296615796
SMDT1	5.45021523662797	21.903759275882003	4.09368285758308	5.1569256856829704e-05	0.0028791835674193897	1.66663967860117
CRTAC1	34.6707848521333	16.4061486021274	4.09174118253163	5.19851283504932e-05	0.00289398949304224	1.65928514253685
LAMA4	-2.61399414790649	5.88537326445512	-4.08951824526949	5.2465157953464395e-05	0.0029122711666307397	1.6508691822041899
LAMB3	42.3755576446873	77.3541987232361	4.08738161237137	5.29305225121457e-05	0.00292963577915928	1.64278391216016
HSD17B4	3.3768713657981606	13.896989808943	4.0802138813935	5.45205198531871e-05	0.00299177458371518	1.6156886281300802
CKAP5	-3.72521191230667	15.0907342901082	-4.0785272287514704	5.49012128751117e-05	0.00300408175065355	1.60931911255878
PLXNB2	14.9479965745361	68.0698815977825	4.07606764039636	5.54608984810093e-05	0.00302495868692796	1.60003498626923
SLC43A1	-1.2446690109954899	2.3723345468359702	-4.07353286490294	5.6043367885018996e-05	0.0030405901796601	1.59047241992877
CLK1	3.83379890942302	14.3463574129459	4.071078915085581	5.66128024297335e-05	0.00306283234779004	1.5812199626444399
SMAD6	1.28094960093311	1.8767361961447298	4.06900364152076	5.7098655136374e-05	0.0030753802835813	1.57339926498579
COL6A3	-18.0865124670188	29.083944106694304	-4.06860447713486	5.71925589804077e-05	0.0030753802835813	1.5718954272333798
LY6D	216.321464541349	245.716845265367	4.0653317595293395	5.796802553640749e-05	0.0030958829250600103	1.5595706757228203
NDFIP2	4.618013541691	16.9047698025776	4.0650733865995	5.8029670572821205e-05	0.0030958829250600103	1.5585980541653401
TCEAL9	22.248015710707897	80.2634680786741	4.05879500644681	5.9546924177870607e-05	0.0031505736246837	1.53498107034551
SVIL	-4.76976139338168	10.8682398855847	-4.05377936922113	6.0786037632024e-05	0.0032072984581336603	1.51613810447577
FNBP1	-2.66706989472888	6.9237695527579595	-4.05235502565629	6.11423654893188e-05	0.00321613163839126	1.51079096163012
ITPKB	-1.52406290564899	5.46649847780419	-4.05177373429587	6.12883567453504e-05	0.00321613163839126	1.5086092246882599
DHRS3	29.030835819196895	55.5053148472987	4.04963014823717	6.1829586723687e-05	0.00323540796421175	1.50056627124398
DDR2	-1.36821731905233	2.12170144249805	-4.04898796215909	6.19926132890723e-05	0.00323540796421175	1.49815748320124
ASAP3	-2.29776959481509	5.574404724092269	-4.04777333952615	6.23020773198083e-05	0.00324274714635295	1.4936024896204299
RIPK3	1.06934565638626	3.3022755605830096	4.03445012022529	6.579438361605921e-05	0.00338779338265424	1.44372095036237
TBX6	2.1595545850822497	3.7609481799310203	4.03345161079671	6.60634728038375e-05	0.00339255363280883	1.43998865192956
MX2	2.6545391134618597	5.66769359611226	4.03221668972181	6.63977190035071e-05	0.00340062557648362	1.4353738498299797
KIRREL1	-2.32998194081171	4.28115333537982	-4.03031991200841	6.69142350913914e-05	0.0034039186375071397	1.4282882670426598
ACLY	-8.05945610952412	37.426922775034	-4.025466516794769	6.82533087750199e-05	0.00345813588936646	1.41017190386399
CYTH3	-1.6054291052190102	4.98199369569129	-4.02486550325511	6.84208912818522e-05	0.00345813588936646	1.40792988283463
RNF38	-1.2398155452621498	5.46480108804852	-4.02336047847724	6.884225842796421e-05	0.00346414891612365	1.40231688610455
FBN1	-2.74338525893031	4.59163503240129	-4.021027537681101	6.950029476154e-05	0.0034836639801828	1.39361998109384
PYCR1	-10.6426642002829	21.6396076465699	-4.02049438587554	6.96515135056855e-05	0.0034836639801828	1.3916331093132701
MED22	-1.05427763962482	4.927214447113941	-4.01968629791866	6.98813087081266e-05	0.0034860790001254	1.3886221069605702
DCHS1	-1.0592592493091	1.81182927902847	-4.01767375181927	7.04567480763225e-05	0.0035006237037430604	1.3811256092730502
TBC1D1	-3.4820528734988905	10.9810279937564	-4.01468868261222	7.131855035249841e-05	0.00352119300275086	1.37001292472002
PRR11	-2.37619637460731	7.29357846612054	-4.0133605359102	7.170520110314391e-05	0.00353120536509482	1.3650709962274798
EXOSC10	-2.03355041505508	13.7680844459836	-4.01157428326379	7.22283554135452e-05	0.00354787159609348	1.3584268594750801
FAM83A	14.632927568248	21.379111303825	4.01032234858036	7.2597177628012e-05	0.0035539958034219296	1.35377178818129
ASAP1	-2.04508731303884	6.3069589250203	-4.0098962120383295	7.2723125624535e-05	0.0035539958034219296	1.3521875881907701
LZIC	-1.5234040129411799	8.30149458823936	-4.00740562554478	7.34633976219771e-05	0.0035810609510855103	1.34293170676534
STAT6	6.53379988964463	30.2116605037251	3.9988614161078595	7.60577189108663e-05	0.0036938719023507796	1.3112186133411499
SP140L	1.0275501612454	3.96024649853871	3.99488991744641	7.729299387670971e-05	0.00371309582464375	1.29649898193014
BTF3	33.1131843296421	159.794763440707	3.99476550387253	7.73319967644226e-05	0.00371309582464375	1.29603808294473
TRAM2	-1.99463015181306	5.208188402095719	-3.99058824475141	7.86524371679133e-05	0.00375282044120222	1.28057078474434
LRRC32	-3.84516936368354	7.25968764953997	-3.9809343873742997	8.178637887318259e-05	0.00384056037319889	1.24488198923144
GJB5	8.97095246868983	20.9730865698739	3.9777063873122502	8.286046126724829e-05	0.0038774867538439797	1.23296631040509
MAP4	-3.5234465418322096	18.669612508157	-3.97735996728602	8.297652066176579e-05	0.0038774867538439797	1.2316880808891202
RNASET2	5.2174587493505005	10.0938583061621	3.97287557846167	8.449289143891709e-05	0.00393876328392195	1.21515070901254
TMEM9B	2.73980571341587	17.991593382148398	3.97226633080534	8.4700922028675e-05	0.0039389005048008	1.21290527083947
USP40	1.3167764808448	5.64228063508661	3.9715455495807404	8.494766372086758e-05	0.00394083292131155	1.21024917450849
FAM168A	-1.5253768808578798	6.337390439921089	-3.96955109798923	8.5633973488733e-05	0.0039431491284724705	1.2029018827623101
INAFM2	4.78327303116156	18.553590489092603	3.96904553946873	8.580877469428149e-05	0.0039431491284724705	1.2010400124492502
SOX12	-2.1162013596690903	6.137222705964941	-3.9689173992092597	8.58531340232114e-05	0.0039431491284724705	1.20056813230991
CTSH	29.9655328173665	74.68981520944341	3.9680690941825802	8.614734757950759e-05	0.0039431491284724705	1.19744457850654
RAET1E	1.16261323578555	1.64937572507067	3.96796048694019	8.61850842892223e-05	0.0039431491284724705	1.1970447188718
HOXB6	5.0492478307800095	5.750381457700349	3.9678328862936603	8.62294404851838e-05	0.0039431491284724705	1.19657494402368
AKAP12	-2.8246634396732904	4.9231930175624905	-3.96561197697221	8.7004943761261e-05	0.00396022609892644	1.18840066514261
AVPI1	9.90988788226128	20.6940893273959	3.9652201199364705	8.714245818401871e-05	0.00396022609892644	1.1869588331506202
SEMA3F	13.2322213192563	38.3197303124005	3.96499522251669	8.722147453118209e-05	0.00396022609892644	1.18613138573143
MMD	-2.90597743322519	6.945488893873861	-3.9627696399097	8.800709162235849e-05	0.00397976104455625	1.17794530257483
PADI3	32.7329766727374	47.935126420008004	3.9626030999773802	8.80661482836826e-05	0.00397976104455625	1.1773329095740401
PRKCD	8.48865327663191	30.2884795250993	3.9603721653088395	8.88608918056975e-05	0.0040062495023949	1.1691317025844399
HNMT	2.99483715910204	8.05832366462797	3.9596609386473	8.911568420405129e-05	0.004008327472653421	1.16651803405204
RNF130	-1.0036747947756501	3.5353338520882303	-3.95677697292642	9.015596401928192e-05	0.0040456435629774	1.15592425047288
IGBP1	5.59762421911664	35.272985225657294	3.9561410585714603	9.038689001604441e-05	0.0040465515376413705	1.1535892774593899
VGLL4	-1.74104739993335	6.308268711631791	-3.95305141960941	9.15168663666917e-05	0.00407812746041457	1.1422495475121202
BCAP31	37.233842233168396	176.79169975232202	3.9454745837575698	9.43449149705548e-05	0.00415593678193687	1.11447523703018
KCNK1	2.59202804577271	7.769489456802731	3.9439312104906405	9.493104486583399e-05	0.00416266129610321	1.10882372860382
PLEK2	10.142927510295099	22.114147036824605	3.9397283090362203	9.654473734483199e-05	0.00422377727891764	1.09344391075648
WIPI2	-1.8504333686735401	11.501572188485	-3.9301071579198505	0.000100337178642349	0.00437971784773855	1.0582937827246899
WWTR1	-2.18870383458678	6.43432485134508	-3.9291296568623597	0.000100730290209428	0.00438690692463101	1.0547269899190401
SNRNP40	-2.0734807499929397	12.079736114680099	-3.9259057603968595	0.00010203718093449201	0.00443376945028925	1.04296914491926
EDNRA	-1.33306187971904	2.81353276093878	-3.9252198843839103	0.000102317283559707	0.0044359046231325795	1.0404688398750201
ETS2	18.091293599727603	53.319111470275494	3.9239542448759503	0.000102836067391941	0.00444835475299463	1.03585611128698
GJC1	-1.0381988699583	2.18089501308487	-3.9204388239564403	0.000104290139245202	0.0044809763184414896	1.02305106035923
HEBP2	3.0311980621383197	11.801902581252401	3.9166587997296602	0.00010587538054517199	0.00453893428292537	1.0092939867536301
TRIM26	3.61763050977656	20.0833174773471	3.9155505172152996	0.000106344474701941	0.00454106398657678	1.00526280718827
IDO1	22.6764323653366	15.5247950131078	3.91542449924783	0.000106397937829821	0.00454106398657678	1.00480450595538
F2R	-3.3099302701831097	7.6449571568231	-3.91264436923461	0.000107583904665205	0.00456988573373581	0.994697208985595
SAMD4B	-3.14285992915466	16.7860266439202	-3.9116177624221895	0.000108024998600232	0.00456988573373581	0.990966603936843
RGS12	1.28549266280195	4.90482811943692	3.90897961719809	0.000109166379108307	0.0046080208289102104	0.9813839412670429
PYCARD	9.02187607398152	25.008123240703203	3.9078480699904103	0.000109659429246243	0.00461868201338451	0.977275594701045
ETNK2	1.4614225190360002	4.0314358829009596	3.90713573616013	0.000109970896035029	0.00462166527187912	0.9746898629375179
ENTPD4	1.55832035276	6.93298011134962	3.9059032746547206	0.000110511767435266	0.0046231920489581	0.970217123812691
FBH1	-2.16920676503461	10.6068661570199	-3.90589010898865	0.000110517558824394	0.0046231920489581	0.9701693511803872
USP32	-1.04206326103104	3.99246853005236	-3.90136509059901	0.00011252516581203501	0.00467783189304316	0.9537587728537329
LRIG1	-2.17244452975657	3.3406872257970797	-3.8951764409283705	0.000115326838435305	0.0047736363340268794	0.9313432314383441
GM2A	12.026323718362999	37.6103998633032	3.8927303500069796	0.00011645231766848601	0.0048098563723461205	0.922492444966888
TGFB1I1	-3.0820514541640605	6.4428176707904194	-3.89006095737122	0.000117692402888172	0.00484424775753956	0.912839532415995
SEC13	-6.43511854501598	27.9550549191119	-3.88943683077197	0.00011798414297934099	0.00484424775753956	0.910583481248572
CAMK2N1	26.5981266358013	63.68166675033179	3.88815230070378	0.00011858673597768501	0.00484424775753956	0.905941299207948
S1PR2	-1.19911763363854	3.98383435338562	-3.8877267554180004	0.000118787007465207	0.00484424775753956	0.904403726980854
RUSC2	-1.32969211011002	4.02705385514805	-3.8877027206634502	0.00011879832832454099	0.00484424775753956	0.9043168896922059
CDC42BPG	2.81431188617847	11.2991739550668	3.8852130973662002	0.000119976539346205	0.00487056434855381	0.8953245940276329
TMEM54	22.675176787500803	81.4943965305248	3.8850613712657203	0.000120048699909377	0.00487056434855381	0.894776744898108
B2M	251.667999229945	699.4470979760831	3.8835470791332103	0.000120771147952144	0.00487296358732958	0.889310055842929
PRDX5	75.98891111717658	308.917046097061	3.88184108264602	0.00012158998418146399	0.0048957174762876395	0.883153659126337
RASL12	-2.34792004761091	3.3563000233090494	-3.8792380873368995	0.000122849489015291	0.00493608218834242	0.8737650927270519
TIMP2	-22.7225542033951	43.295017085813505	-3.87821406221452	0.000123348357352462	0.00494020012608609	0.870073200150827
INAVA	3.40569695716527	10.312311990669699	3.87797228925044	0.000123466419895935	0.00494020012608609	0.869201673371847
CERCAM	-6.74129873154046	16.3593773811567	-3.8748595096090495	0.000124996034867252	0.0049782066317990105	0.857985418206415
TLNRD1	1.76986994158112	9.20548235551327	3.86849265219242	0.000128180721268381	0.0050623997911322105	0.835069679166082
ATP8B1	6.68471222780879	17.7943870945953	3.86353944817945	0.000130711231177124	0.00512573773338264	0.817266071205559
INO80C	1.42068640878434	5.3598422649017	3.86342116861201	0.00013077223208151102	0.00512573773338264	0.816841189274364
FSTL1	-12.424727996373301	30.615031047369104	-3.8588797210832797	0.00013313488687178	0.00519713137654352	0.8005365666531921
ITM2B	16.762896963259898	57.7569748334757	3.8548796353320895	0.000135249289493082	0.0052476724323316	0.786190211765175
ANXA8	4.85036847991711	11.1761271006593	3.853193479574	0.000136150054474254	0.00527197166579139	0.7801469146666992
EMC4	2.3171416271720697	17.8885451123402	3.85107969417007	0.000137287279398438	0.00530531084130062	0.7725744162691469
DPYSL3	-11.0629034173737	18.0967479424519	-3.84889907977514	0.00013846986792334198	0.00534026562918816	0.764766532938896
APOBR	3.18577059253654	5.72427257866584	3.84440443126754	0.000140937856817091	0.00542455406418645	0.748685945066345
CHEK1	-1.05133601782683	3.97427047378044	-3.8420808206998505	0.000142229990325529	0.005452433521341529	0.7403795331662429
TRIP10	5.31095425299838	25.6110200555689	3.8366394697478396	0.000145299822408721	0.00555902069558148	0.7209460389419109
ADGRF4	2.17623593841877	6.084709239321259	3.8325901233031	0.00014762486456046002	0.00562556180307182	0.7065005491156792
SELENON	-7.642826116710731	37.0628101677081	-3.8316998714456405	0.000148140720735205	0.00563404095532741	0.7033265897035511
UBE2L6	21.468340192039303	55.074208329326105	3.82401434938626	0.000152665479391187	0.00578322129622708	0.675954247373832
EMILIN1	-13.5523370276714	23.3153832873912	-3.82111574094262	0.000154405670856788	0.00583762857180209	0.665643927951819
P3H1	-3.09102438883431	8.1519268150784	-3.8201893845932	0.000154965753226467	0.00584729323471028	0.662350414138758
CD46	8.32731211616413	33.2021346186544	3.81949390892497	0.000155387504251332	0.00584998031911121	0.6598782459335171
MAP4K4	-3.4583775467234	11.8244966787274	-3.8190682799495095	0.000155646149279695	0.00584998031911121	0.658365492092821
ALDH1B1	-7.656937002169959	17.0539940118243	-3.8183502992242904	0.000156083371817795	0.00585495554518082	0.655814026761795
NUP155	-1.743476557049	6.3107335257329495	-3.8126164850755697	0.00015961691372745702	0.0059526598224564	0.635453888953444
SAE1	-8.17520148102241	44.6973804502115	-3.8113288780675	0.00016042074338182	0.00597100929726985	0.630885634471538
PBDC1	4.27878765336361	25.889893518881998	3.81036719439845	0.000161023597864269	0.00598185535895775	0.627474643749662
AUNIP	-1.05506200270023	3.16632956381514	-3.8087243273382203	0.000162058421763729	0.00600867576910072	0.621649411219661
PERM1	1.57014251070295	3.2639199513333303	3.80745149916171	0.00016286447741716201	0.00601143826932361	0.61713785173522
GNB1	-8.54004976477898	62.8435808551865	-3.8026111640749707	0.000165964474024278	0.00608304138952345	0.599993962279495
SEC14L1	-1.3084964079074601	5.2146466088821795	-3.80036830121492	0.00016741973384261	0.00612092490103707	0.592056858505004
S100A11	505.73716919299204	2029.4715022847502	3.7995492708983303	0.000167954150934423	0.00612092490103707	0.5891595331651079
VKORC1L1	-1.86492661770241	9.49625483025117	-3.7980885294776296	0.00016891128508756	0.00614400815434051	0.583993586435631
KIF15	-1.06254417469906	3.33374504615959	-3.79700635621315	0.00016962368549260402	0.0061467783086244605	0.580167641720774
FXYD6	-2.28918687241779	2.81322593335314	-3.7939539282916	0.000171648432860073	0.00620843653768468	0.569381448438703
MRGPRF	-3.194781484196	4.80990408834411	-3.79292841698571	0.00017233378442054799	0.00621860743554421	0.5657594605265971
CNN3	-15.934116220344999	50.291378363587796	-3.79004501191569	0.00017427464108623602	0.00626801265300047	0.555580467951313
APBB1	-1.27442592007934	2.5064670383924303	-3.7890844313306298	0.000174925789472199	0.00627967236000571	0.552191020781607
KPNA2	-14.4613796299801	57.5905208411202	-3.78697378683954	0.00017636460756513	0.006319512412119171	0.544746323980798
PKIG	-6.73195077680683	16.181338857251	-3.7862837230887205	0.000176837439601026	0.0063246552420434	0.5423131547962
SERPINF1	-20.8808162526347	34.1435166926247	-3.7817637889414	0.00017996421346263	0.00642204926816029	0.5263860015561479
CCDC102A	-1.0123514656272	2.87626097981829	-3.78122966187531	0.000180337137227924	0.00642204926816029	0.524505032343682
MAD2L2	-4.30113233226753	13.485445997230698	-3.7809056583262795	0.000180563709507787	0.00642204926816029	0.523364149150962
EFEMP2	-4.39860290389634	9.675228131501921	-3.77865971366516	0.00018214167656991598	0.0064661978561955605	0.5154582074751219
FAM160B2	1.66594676021399	7.884161820211309	3.77647914863405	0.000183686153328552	0.0065089967911959	0.507786575770579
RBCK1	5.813690317671409	33.5825294965993	3.7741237148713	0.00018536836966799098	0.0065444575511828	0.49950433701248204
LTBP2	-4.9385423894852805	10.6633816693521	-3.77014643377033	0.000188241927679395	0.00663371461102837	0.48553019332871206
MTOR	-1.10346439782878	5.99130498803848	-3.76821486263416	0.000189652588277409	0.00667118609973613	0.478748564407878
RAC3	-5.570629434730459	10.3573077597724	-3.76458794779875	0.000192328374999949	0.00672834020081788	0.46602339658398395
EPHB6	12.1757231766709	19.311505581352	3.76369817365221	0.000192990232383296	0.00673921891482471	0.462903326837451
RABGGTA	1.88820486897588	10.586716526859302	3.75933434143129	0.00019626748948103	0.0068288286285736795	0.447611080683695
ERN2	3.2734270608297096	3.6569099218889503	3.7588511219525294	0.00019663360034606102	0.00682919516861926	0.44591873935683296
SGCE	-2.94243284474917	6.53426930959438	-3.75809047986841	0.000197211205532995	0.00683632428479146	0.443255211776417
SPON2	-4.99687788090096	9.50832160980618	-3.7576442987860297	0.000197550764243427	0.00683632428479146	0.44169305975477097
MLPH	3.0587006411983597	6.9146728463036	3.7545846043150597	0.00019989419290933	0.00690497818168451	0.430985212666531
GEM	-4.0120220547473595	6.30426994532561	-3.7531195824175203	0.000201025516130535	0.00690857560321473	0.42586102083131894
DNAJB5	-1.05635813354463	2.08718807977515	-3.7530524994720205	0.00020107746340711398	0.00690857560321473	0.425626429951819
MLXIP	-1.47425590994743	6.727952928190759	-3.74996954937729	0.000203478525258474	0.00696614715884894	0.41484946937865397
DENND2D	3.95344524541507	12.3923764383921	3.7484925467388797	0.000204638398968568	0.00698591776034846	0.409689275747199
MYADM	-12.044601424341302	24.4697473625352	-3.74469076097952	0.000207652640547754	0.00707123513184427	0.39641568442998
UCHL3	1.65448199565018	8.30076052083199	3.7414252176152	0.000210275094740055	0.007147864547924791	0.385024319119407
GNPTG	2.48881957739267	14.6234670404185	3.7317847176819505	0.00021820040406381799	0.007378093240228309	0.351448703970083
INIP	-1.0650394959624099	5.6504849613144	-3.7285063894387998	0.000220959017015592	0.007432117129249479	0.340049384469826
SRP14	15.0406851678244	107.20848704906601	3.72749088029424	0.000221820182452609	0.0074480392031203	0.336520170043039
TTC22	1.7015517289581799	5.047085217117241	3.7243760047692596	0.00022448141020286498	0.00752424077549079	0.32570056736879
ILVBL	3.77192551310086	17.9418185641402	3.72348153816083	0.000225251149698754	0.007536887771976091	0.322595167154851
RASSF7	8.70952947207339	28.761933604264698	3.72092909295551	0.00022746137113964398	0.00759390538557877	0.31373742452124
CALD1	-11.439834561493402	22.6620292203339	-3.7206021034312897	0.00022774599094519302	0.00759390538557877	0.312603081676319
TMEM91	2.12345442465707	4.536684795445679	3.71815795896029	0.00022988408710993398	0.00763561898510636	0.304127157942587
PTP4A3	-3.8832973773634603	10.199455988109198	-3.7161710648257	0.000231636108456293	0.007670350170709591	0.297240723967292
SLC12A6	1.3239620092842	3.75909396953107	3.71544143094445	0.000232282643526724	0.0076785205706958095	0.294712723644359
ARRB2	-2.74023611276543	9.31397549350176	-3.71068642522896	0.00023653791630917403	0.00779236229954375	0.278249111646161
TXNDC17	7.03240409101081	20.1931315849213	3.70926081795204	0.00023782793615114903	0.0078214440782859	0.273316944143914
CAD	-2.24000711566703	9.89353893084383	-3.70601815866311	0.000240786910678613	0.00790397192980803	0.26210489209114
GLT8D2	-1.5515828002405199	3.02713543527066	-3.70345307939739	0.00024315210761496	0.00795074600714516	0.25324214886685
RASSF2	-2.9747085902880697	5.49519097195488	-3.70316885188009	0.000243415529115972	0.00795074600714516	0.25226045028544897
RAB3IL1	-1.6846041462853998	3.19682262472238	-3.7000318794762097	0.000246340775331944	0.00802862871191625	0.24143025887501002
GNPDA1	4.09046927634572	17.700279580898698	3.69971724220644	0.000246635996044496	0.00802862871191625	0.240344465374677
CFH	4.19298816464914	9.247349728274	3.6986041105565204	0.00024768311156536096	0.00804907248853522	0.23650380719043
SPIN1	-3.6442718376730903	18.1933644692307	-3.69371232516052	0.000252334595104977	0.00818638215132802	0.219638335254292
CLCN3	3.2367930331282095	11.780753897934801	3.69291798834686	0.000253097628671819	0.00819729014548223	0.21690164961053401
XAF1	1.43444711341494	2.2299489619371204	3.6912473401387	0.000254709533891777	0.00822176690407642	0.211147642746287
MSRB3	-2.9214186799587596	4.49729943154705	-3.6876917923705204	0.000258172286334714	0.00831955860963845	0.19890977397833198
SLC29A2	-2.31286052203935	6.49072846785671	-3.68709363924981	0.00025875916488512596	0.00832450338489738	0.196852064277595
GPRC5B	-1.89112439948071	2.87634476894	-3.6862076973483395	0.000259630715381243	0.00833857444751195	0.193804901614572
RAB23	-1.01928486903869	2.28015227202822	-3.6849788061949904	0.000260844219325779	0.00836356273183791	0.189579306547065
GPC6	-1.1937217701123601	1.85254798338391	-3.6823859720161702	0.000263422123249295	0.00840534263089132	0.180668036702908
MID1	1.9566605899116	5.937287600782359	3.6804934171732904	0.000265318897329493	0.0084339374888487	0.174167231353363
MECOM	3.4730749204603897	9.552966535227599	3.68030659201217	0.000265506834387682	0.0084339374888487	0.17352566751332196
SMIM15	2.80237276340968	18.9897870902497	3.6801406576710898	0.00026567386133257597	0.0084339374888487	0.172955868865415
CRTAP	-4.33925943400018	22.0453625730374	-3.6785229148981102	0.000267307445508836	0.008471793396770141	0.16740198707708598
FAM20C	-4.32438129319374	7.796150628326191	-3.6752939949047	0.00027059628404908	0.00855215315509212	0.156323560413077
PARVB	-1.4310998196595701	3.26187877140513	-3.6751600056960694	0.000270733579001146	0.00855215315509212	0.155864039062983
IL4R	5.22381156211667	20.8223561862643	3.67364750206469	0.000272287951323177	0.0085871303663595	0.15067792913524403
MSANTD3	-1.6842049428086698	7.28599822906613	-3.67262214912915	0.000273346458969432	0.00860638047699493	0.147163304009347
MDC1	-1.38848725115225	5.14500350943124	-3.67108954016788	0.00027493584509575897	0.00864225505877111	0.141911649272142
TRIM31	13.3307914416892	13.1440152456973	3.66811378625368	0.00027804669888175	0.008711525120265741	0.13172072720178601
ANKRD22	4.11102584814063	9.44203951586081	3.6644039236483996	0.00028197136808617	0.00880575950481786	0.11902651650382198
MXRA7	-1.9948082905876898	5.92288433192796	-3.6597684176723497	0.000286948519533965	0.00893214467774607	0.103181803157072
BLOC1S2	2.44339703927356	14.359394576101	3.6586739948945404	0.000288135599881302	0.0089401168518906	0.0994436615265828
SYT11	-1.72362540659969	2.70662066299018	-3.6581955859212703	0.000288655961899189	0.00894181678102552	0.0978099213606152
GNA12	-4.56530330269749	13.411719056898	-3.65747003894853	0.000289446820898797	0.00894897779980292	0.0953325984182962
DNAJC11	-1.17191789074071	6.85028232030055	-3.6569064746881	0.000290062521446073	0.00894897779980292	0.0934086685731135
PPP1R37	3.7354578273272003	13.781907905969698	3.6567031375446004	0.00029028497184615295	0.00894897779980292	0.0927145717103883
SPTAN1	-3.4047958073072	18.2223659178115	-3.6559852577698098	0.000291071614437295	0.00895884844051713	0.0902643571717068
AGO2	-1.09544389129361	3.91981065874176	-3.6535098376327206	0.000293799545826677	0.008990827597713809	0.0818188724778448
CNRIP1	-1.00665060360243	1.84511883296178	-3.6523415424983705	0.000295095349208231	0.008996192503005221	0.0778348070733443
RAB10	11.1562564066191	61.4170874932288	3.6502111725503	0.000297472072884598	0.00905427675407541	0.0705729757631746
COL16A1	-4.37826585586418	9.2373165258288	-3.64771053889961	0.00030028483644719303	0.00912542811519744	0.0620540573046666
GPR176	-1.3362359517600901	2.48412061070548	-3.6472325258379	0.000300825353949763	0.00912741192410607	0.0604262277695842
C8orf88	-1.22493160308114	1.57671800186592	-3.64443425613304	0.000304007916128512	0.0092094259261265	0.0509009664813647
ANKRD27	-1.9858641009671798	7.927478518076191	-3.6439184511100002	0.000304598001686916	0.00921277042582506	0.0491459189906296
THAP4	3.3847999710504504	19.511607516730198	3.6418963974106497	0.000306921648285456	0.00922436008033171	0.04226803251553601
TUBA1A	-27.908164109029304	40.2014768531461	-3.6417096167085803	0.000307137126198126	0.00922436008033171	0.0416328894376807
HOXB5	3.3950827632377703	4.53877221658949	3.6414969743408596	0.00030738261227805403	0.00922436008033171	0.0409098413811675
FRMD8	4.40936453590898	19.703466089439303	3.6354623653349902	0.000314426666792034	0.00940635290094673	0.0204067638208274
TRIP4	1.1239859902823601	9.965665824727608	3.63479644253323	0.00031521320901470095	0.00941521756195388	0.0181461790885686
CSDC2	-1.03762604727665	1.3421679883616	-3.63258250100858	0.000317841476908132	0.00944963375464023	0.0106333656462763
RGP1	-1.18634095033144	4.77149574075991	-3.63004332153875	0.000320881197776573	0.00951056216743342	0.00202214159225012
TSPAN1	30.764704428641895	53.7910936355626	3.62897895739489	0.00032216348389819504	0.00951918749499805	-0.00158581009748193
PHF13	-1.83047137702708	11.8296249389029	-3.6281357020239704	0.00032318280709478503	0.00953463747014199	-0.004443552878690579
EVL	-1.49504890556979	5.79046942504331	-3.62759611375539	0.000323836647893734	0.00953927401755684	-0.0062718607442198105
TIE1	-1.04234425103348	2.7098859375855398	-3.6257047898684704	0.000326138266881427	0.00959236072545894	-0.0126783042208132
RNMT	-1.3292911908500702	6.389086122775099	-3.62284934456612	0.000329642293373336	0.009636001973562609	-0.0223445923628329
PDLIM1	32.3115020273396	122.38230626285801	3.6218452605420604	0.00033088282534728	0.00964330128015153	-0.0257419414603302
CAPN8	3.4558001648158903	4.02640049131863	3.62060997965568	0.000332415014185821	0.00966420506302601	-0.0299203469503091
ORAI3	2.21137733297175	7.12496574167284	3.6189457036617796	0.000334489849872807	0.0096846513095927	-0.0355477492184031
STXBP1	-1.0464991031378101	2.34622146233357	-3.61721507785135	0.000336660300279989	0.00972315447695861	-0.0413969392065754
SYPL1	16.4896280287698	73.0958551026278	3.61374462916156	0.000341052653900905	0.00980577435751615	-0.0531185366355356
RAPGEF1	-2.7445320221201097	10.8211314970371	-3.61224049373049	0.000342973022654194	0.00984044415117125	-0.0581955605370732
ST6GALNAC6	-1.722937520163	7.455634317597059	-3.6115244063240097	0.000343890833592688	0.00984044415117125	-0.0606119322948482
ERAP1	2.43889796872677	9.03391018552434	3.61149945177456	0.000343922859448017	0.00984044415117125	-0.0606961310880845
CDC20	-13.7801225657184	43.7512549806145	-3.6111995606629996	0.000344307949056913	0.00984044415117125	-0.0617079469854103
DPH2	-2.32038048646712	11.480744582207198	-3.60743720021112	0.000349173720318289	0.00996304704008341	-0.0743952777705204
FMOD	-6.750975282551099	11.8260150656314	-3.60534854934387	0.00035190271810168	0.0100049524284597	-0.0814332412064189
STK40	-1.8028499438750902	8.822236822463449	-3.60389574071186	0.000353812729378063	0.0100226066083113	-0.0863264129749259
RPS6KA1	2.5073327780762997	11.4400999602685	3.60096861354784	0.00035769062762136	0.0101066592432203	-0.0961796115928655
JAGN1	-6.42954590283697	27.3929303700958	-3.60086219673902	0.00035783235891855697	0.0101066592432203	-0.0965376875188575
HCFC1	-2.13063275251225	13.199219967325899	-3.59726543413689	0.000362653828522555	0.010212799751619	-0.10863442069164801
CTNNAL1	-4.01959527277221	8.51998370303219	-3.5955344637432702	0.000364995871604781	0.0102637052855658	-0.11445204537084
BRD3	-1.07057297452463	4.695515054843679	-3.5928163684009804	0.000368702184336016	0.0103527692285929	-0.123582024872111
MAP3K20	-1.52970898060906	3.76177387409665	-3.5906265924898797	0.0003717137556427	0.0104220940012755	-0.13093270907378202
COX5A	11.917786161073801	72.5488093383833	3.5896300786559396	0.00037309187767235	0.010445484843403999	-0.134276441049629
MCAM	-5.12265862637	13.6196670017965	-3.58698660434919	0.000376770917280569	0.0105130114687578	-0.143142232592885
STMN1	-21.9838835619351	53.340555724588	-3.5851596818857003	0.000379333388544984	0.0105187052961513	-0.149265873930449
POGLUT3	-2.88750919197665	9.28781580512699	-3.58487625385685	0.000379732391457411	0.0105187052961513	-0.150215632080117
MYH10	-3.23044237177988	8.32444254685501	-3.58462346689165	0.000380088590832501	0.0105187052961513	-0.151062653833907
ATP2C2	1.63732440268579	2.94747795315004	3.5818262417896096	0.000384051113712335	0.0105978242671826	-0.16043168438737399
LAPTM4B	-16.638393804061998	54.870514865906	-3.58065170479991	0.000385726477375361	0.0106014179167436	-0.16436364346598198
HS6ST2	1.78106182400149	3.6805304719309597	3.58057418210059	0.000385837296876174	0.0106014179167436	-0.16462312128267498
MEF2D	-1.31818188105982	8.59301537029655	-3.5772733326693795	0.000390583701951668	0.010685969486729	-0.17566659162292403
APLNR	-2.2823578617392	4.73282012590251	-3.5757309387688196	0.000392820288895327	0.0107127268946202	-0.18082363108842303
NAA35	-1.03171991194085	5.88097346260576	-3.57438359233328	0.00039478386706980696	0.0107396868993523	-0.185326822750655
ZNF561	1.48337171640701	6.647248440323629	3.5699035244644097	0.000401379369810498	0.0108562890799515	-0.20028899975772102
AP1G2	2.91818717599195	11.166260290355101	3.5669007202346097	0.000405857752721335	0.0109172324912688	-0.21030770952303
HLA-A	216.134421567398	547.259569773398	3.56562522342372	0.000407774171093682	0.0109534415804549	-0.21456095741283898
THY1	-8.98248007102997	19.6005081465642	-3.5625348815503104	0.000412452613342518	0.0110636381171179	-0.22486005633894102
CIZ1	-3.60814911747105	21.932358526392303	-3.56194221922874	0.000413355571481605	0.0110723948478043	-0.226834251851065
MZT2A	3.47759987085773	12.825860861868	3.55829600544975	0.00041895170966366603	0.0111755368552783	-0.238973262064069
CYP4B1	34.312843499634496	56.344034322125395	3.5578623312412994	0.00041962201027358	0.0111778922736676	-0.24041628079232
CP	8.097361769266879	7.4410156655031505	3.55600031852916	0.000422511437230476	0.0112230935295501	-0.24661012056168602
MAPRE2	-1.8222046581826299	4.3416827154771696	-3.55575639124887	0.00042289133640995697	0.0112230935295501	-0.247421300947239
MAP3K5	2.64898645591327	9.00598604382917	3.5541110746496005	0.000425462174130873	0.0112399264324038	-0.25289144328746604
IARS1	-3.4358839726417703	15.6644318045206	-3.5524977655321903	0.000427997217805303	0.0112645571859642	-0.258252871791909
SKI	-2.01204756465274	12.871797496113	-3.5521660763597405	0.000428520162960419	0.0112645571859642	-0.25935487543752
CLEC2B	6.48098199162743	9.69339594799005	3.5512035506657305	0.000430041085015133	0.0112645571859642	-0.262552224550875
HSH2D	2.26069283161601	5.29491759158145	3.5505437285993904	0.00043108661520794	0.0112645571859642	-0.264743574651674
PPP1R7	2.44492986545616	17.1337877365593	3.54897701630402	0.000433578722590758	0.0113142838941279	-0.269945292503323
PPP3CB	-1.4355370370138	8.82378614474316	-3.54772294376428	0.00043558324835636804	0.0113511694273167	-0.274107452216025
GSTP1	116.465085822499	400.485469287742	3.54335712890271	0.00044262957071054696	0.0115035771787101	-0.28858648336844
CAP2	-1.31491698549426	2.59838384079425	-3.54149051822008	0.00044567471050639695	0.0115670655270079	-0.294771923751298
COL6A2	-74.95337557002091	127.501570063433	-3.54102436082062	0.00044643824457753895	0.0115712455133012	-0.296316166708183
HLA-E	68.1572113286587	268.288369766906	3.5406042077093898	0.00044712747669517695	0.0115734909938107	-0.297707847937128
DPH3	-1.36817891133556	7.601434170950889	-3.53820574740921	0.00045108111198215303	0.0116288105190996	-0.305649354941721
HOXB3	2.8074546294353997	4.60014051632621	3.53650463690512	0.000453905057671482	0.0116546798631531	-0.31127882431111104
ZEB1	-1.2576999010056398	2.2029093499425096	-3.53480897491074	0.00045673643342969406	0.0116961065872676	-0.316887741297158
TEAD1	-1.5314259994738897	5.81500583232397	-3.5316124981039	0.000462118875448517	0.0117744047393586	-0.327454211927312
DNMBP	1.6221023635767498	5.6864476415942695	3.5309710074692497	0.000463206193405133	0.0117744047393586	-0.32957368474795196
ARPC2	8.634175689942	57.667756620658906	3.53075908525139	0.000463565924925438	0.0117744047393586	-0.33027379250889505
PRKD2	2.51432747600118	17.1047605196562	3.52738745380932	0.000469324479119204	0.0118447384309638	-0.341407046566379
SMO	-2.37466128672065	5.12130512068609	-3.52658943246041	0.000470697224047454	0.0118571599410579	-0.344040685663159
SSC5D	-1.25933510173196	2.02631949366821	-3.5263838967823897	0.000471051392014328	0.0118571599410579	-0.3447189064821661
KRT15	44.2651360790644	36.0077882226148	3.52507457339874	0.00047331341213694805	0.0118881704607986	-0.349038505890237
RARG	5.1456482014191	20.7043413742992	3.52464462357027	0.000474058420027761	0.0118881704607986	-0.350456629264905
TRRAP	-1.33113905138394	6.49648521185523	-3.5245974094658	0.000474140298498996	0.0118881704607986	-0.350612347856265
FLNA	-48.5664127879197	104.21675462284401	-3.52408919875131	0.00047502247387081603	0.0118947609298082	-0.352288372823387
ALDH1L1	2.6753524343735697	4.03335264588392	3.5157098294659104	0.0004897911654943	0.0121851413529579	-0.37989001101364
RASSF1	-1.6099000821622602	7.3384290754402	-3.51148586461657	0.000497397844373522	0.0123506837140474	-0.39378041677019104
TXN2	7.06498014926378	43.3917036624626	3.5106014862309904	0.000499004402984108	0.0123506837140474	-0.396686693082759
MBD6	3.1231982598816606	15.805808208436199	3.5051638275608097	0.000508989657408346	0.0125651097174611	-0.41454105065658897
IL1R1	-4.07718733012709	11.026134506421599	-3.50388850376391	0.000511358469751783	0.0125946982057192	-0.418724776280069
MKNK2	9.997603283958151	40.2261623533512	3.5038059135737205	0.000511512229558438	0.0125946982057192	-0.418995665888649
APOL6	3.67626867509889	10.0521618825936	3.5034606190799904	0.000512155539866015	0.0125946982057192	-0.420128141041078
TRERF1	1.2306582937592299	4.41154573981082	3.50243733541803	0.0005140664453183349	0.012625524486936001	-0.423483628146625
FOXA1	7.83862848588819	21.433457977920302	3.4994755020586497	0.0005196351140142269	0.0127297346935679	-0.43319070737856297
TAPBPL	3.3976884803073597	11.214800340302599	3.4988725234083997	0.0005207756923659941	0.0127388244206072	-0.4351659598403929
NDC1	-2.01355833888625	10.119386585115599	-3.49857850004422	0.0005213327082472809	0.0127388244206072	-0.43612901318306296
ID3	24.9514781924345	50.822875631529996	3.49763112023839	0.000523131276345116	0.012766530233143999	-0.43923157470648294
YIF1B	-4.12743341542016	16.5395386391886	-3.49406351500463	0.000529956473560373	0.0128419578372659	-0.450908010012754
IRAG1	-1.79252344372163	3.08631035059313	-3.49340571319906	0.0005312239761481731	0.0128419578372659	-0.45305971357871294
PICK1	1.8227514789349197	8.58542120226353	3.4933497336676096	0.000531331972594238	0.0128419578372659	-0.453242807972496
MIF	16.3198764267613	61.2013450382489	3.4929569780541496	0.0005320902595786519	0.0128419578372659	-0.45452733142759494
PRRG4	3.6069017821464504	9.579250989509939	3.49236669924366	0.000533231805543956	0.0128419578372659	-0.456457607998084
NUP160	-1.24289202155204	6.03585723713111	-3.4919877672229203	0.00053396583275498	0.0128419578372659	-0.45769659615898
LSS	-2.1213790876132	8.56957663752091	-3.49175498582547	0.00053441722087985	0.0128419578372659	-0.45845765539434097
SYDE1	-1.5719640743109	4.54468646056128	-3.49169797913366	0.000534527817368282	0.0128419578372659	-0.45864402673667604
CCNY	-1.8046373779291498	13.4556230451375	-3.49151530485291	0.0005348823609375849	0.0128419578372659	-0.45924122251090793
KCNE4	-1.00075174748978	1.6389501037941598	-3.49049343799668	0.000536869712316466	0.0128419578372659	-0.46258135270132306
SELENOO	2.8275780578365803	15.1663779257532	3.48980781584962	0.0005382069959540691	0.0128419578372659	-0.464821901106145
CASP7	2.6564803821300496	11.476564549219699	3.4878049513086005	0.0005421313830212871	0.012918331690206997	-0.47136470960330606
NRP2	-1.5869905285963797	3.23344285335907	-3.48654555461668	0.00054461271585855	0.0129572920095728	-0.47547700923036895
NECAP2	-2.12737189948816	15.3283339385751	-3.4862909250608505	0.000545115690083038	0.0129572920095728	-0.47630828017673604
SPDEF	3.30811595917373	3.7283807948842798	3.48529382680219	0.000547089459848994	0.0129878663982715	-0.479562887778484
GRB2	-4.937870235235019	36.473500105891496	-3.48495865302975	0.0005477544404144491	0.0129878663982715	-0.48065672543711496
APOBEC3A	4.65689010436213	3.1617631358205402	3.48410439755702	0.000549452692244137	0.0129960448365036	-0.48344413708810097
IFNGR1	9.919373731201368	37.8599649586451	3.4824203347970997	0.000552815022941855	0.0130434463521146	-0.488937309696573
NFE2L2	5.39351226828967	24.619419579890398	3.4815831514432998	0.000554493659071439	0.0130670002651854	-0.49166715557758206
COL12A1	-9.202708326575221	19.0080925285367	-3.4801546693286496	0.000557368916787057	0.0131026039361227	-0.49632365780536203
PDLIM3	-2.8894452846419503	4.5095357758150305	-3.47941098924159	0.00055887131254814	0.0131110011543419	-0.498747163525599
TCEAL8	6.97910180380453	43.658761517243	3.47881033320485	0.000560087531707592	0.0131183428463122	-0.500704227629591
S1PR3	-2.05385107882994	3.28631030277098	-3.47807010307857	0.000561589766814355	0.0131235471174752	-0.5031156176262109
COL4A2	-20.128918120450198	52.5745359960289	-3.47802750178224	0.000561676337111561	0.0131235471174752	-0.503254381901623
BTBD16	14.0064267987622	17.9013021623229	3.47614867031668	0.000565506751552448	0.0131969898788777	-0.509372673071675
GGT6	9.11930807336334	22.860296540991698	3.4724824163205703	0.000573051640399185	0.013340642188492999	-0.5213026577201839
ORC1	-1.04501836050875	3.7614419358767903	-3.4702412697185405	0.0005777099895730441	0.0134239538097117	-0.528589528526997
FBLN5	-2.08924982055811	4.52676347416175	-3.4689224245994	0.0005804678007359191	0.013457011248585	-0.532875562480807
TPM1	-8.551956403165441	16.8527894789619	-3.46803268665711	0.000582335259344136	0.0134588820589212	-0.53576620378469
TPT1	69.6738986658094	342.465883577522	3.4675139714334797	0.000583426572900614	0.0134591873430723	-0.537451120113382
ESPL1	-1.03492289089525	3.5080451072397296	-3.46736040284208	0.00058375002898986	0.0134591873430723	-0.53794990380102
ISCA1	-1.36164562028456	8.52613546488919	-3.46632111850797	0.000585943445551739	0.0134935609295764	-0.5413249064485961
BCL10	1.96702564858853	10.2176290024575	3.46598452815875	0.000586655471276794	0.013493778420769	-0.54241775635664
FYN	-1.7555896001212299	4.1887373576641895	-3.46499135190252	0.0005887611594030009	0.0135183006744125	-0.545641845230641
FILIP1L	-3.1683272331818904	6.251156209635759	-3.46438918881803	0.0005900412757827371	0.0135230700986674	-0.547596189114423
CDH11	-1.7911095900727498	3.3043793862119704	-3.46152371231135	0.0005961686014471169	0.0136433184697461	-0.5568918376287789
ITGA7	-2.58749507612537	3.51282959634871	-3.46100923968715	0.000597274987952796	0.0136433184697461	-0.5585600300735389
KRTCAP3	10.096070365759	27.509934370089503	3.4609423024756802	0.000597419079092809	0.0136433184697461	-0.5587770588187541
GCH1	1.61485588028959	6.9020115167337	3.4583740578098	0.000602972155482294	0.0137537805441721	-0.567101034887972
FCRLB	6.27515769806453	7.742671276646991	3.45586383898647	0.00060844633769209	0.0138457587224103	-0.575231337273703
GTF3C1	-1.57876456460287	10.073565715035802	-3.4549099602680804	0.000610538663493899	0.0138632236732262	-0.578319384760536
SNX8	-1.66559369051075	7.04287118640338	-3.4533893188908302	0.000613888081823966	0.0139201115696707	-0.58324059138213
CYP3A5	2.8552394334967204	4.24946904572416	3.4506105886481695	0.000620052991155753	0.0140216826053419	-0.592228059212882
PMP22	-10.1486331744454	19.9611280783871	-3.4498840058309104	0.000621674502903155	0.0140216826053419	-0.594576983410481
POC1A	-2.22065463565813	9.1825508878314	-3.4489199376616604	0.00062383212387609	0.0140216826053419	-0.597692942170474
ARPC3	15.109475446494901	96.84063655151779	3.44884063805833	0.000624009910322462	0.0140216826053419	-0.5979492095294
TMEM104	-1.0983273502241702	6.02014953165863	-3.44648572880814	0.000629311137954841	0.0140868877803737	-0.605556894350886
ODF2	-1.57289677157166	9.74206069601756	-3.44576231780868	0.000630948061966493	0.0140906842768936	-0.607892940055261
ITGA3	21.488309457666396	52.380287146665104	3.44518557481838	0.000632255955449714	0.0141034934731326	-0.6097550340913199
MOCOS	1.22408947735071	4.36731468181997	3.44456121647398	0.000633674680983601	0.014118742370036002	-0.611770530872056
BIRC5	-5.66984217754753	19.4736784602047	-3.4424819037763306	0.000638420954425665	0.0141915657994205	-0.6184803050788089
LAMA5	6.14511387357578	21.7807330069705	3.4415003296370696	0.000640673026510355	0.0142251631759051	-0.621646443405927
TINAGL1	41.0371387329863	87.88652416615179	3.4404936610750894	0.000642990376777089	0.0142454900861855	-0.62489264474803
NT5C3A	1.6283121221251597	9.955719907325	3.44045828626649	0.000643071951719404	0.0142454900861855	-0.6250067015723989
CRB3	3.7010877475824904	13.837412228582	3.4393520968919997	0.000645627724939734	0.0142772075988638	-0.6285727642922561
SURF4	-12.166421765599301	76.7250265842929	-3.43845917432126	0.000647697673799586	0.0142772075988638	-0.6314505254106179
TRABD	4.9504026702781	25.4792244534	3.43787800789493	0.000649048244858499	0.014279061386886997	-0.6333231641911121
MAZ	-4.1036224190956405	18.7846295118811	-3.43725636226038	0.00065049579534374	0.0142942193570525	-0.635325906240463
MTX2	3.73624198565005	23.973275611644397	3.4369433712863904	0.000651225759524156	0.0142942193570525	-0.6363341335956121
SRC	9.34461202267561	34.6026301037241	3.4355258723196203	0.00065454126471578	0.0143430822462077	-0.6408991957663289
PODN	-3.4013294149565603	6.01707637262119	-3.4353535088795	0.000654945492550461	0.0143430822462077	-0.641454172407414
SHFL	1.66287482105891	7.6308861848668705	3.43469519073862	0.000656491530157185	0.0143479862538671	-0.643573587600923
PLEKHO1	-3.436580742601	9.36986447572578	-3.43462203743891	0.000656663538329127	0.0143479862538671	-0.6438090766397729
TMEM117	1.2502345950839	3.9338799656770003	3.43369824393375	0.000658839312741282	0.0143628465840058	-0.6467824706431999
CCNDBP1	1.08544356461233	6.60936183609627	3.4329142405225896	0.000660691122033697	0.0143860534166367	-0.6493053358164139
MBOAT7	11.318295580829401	46.589271548988506	3.4326138559012698	0.000661401914343966	0.0143860534166367	-0.6502718079603671
NES	-4.576116715928269	8.86832009444838	-3.43168930799474	0.0006635941298262	0.0143943561401934	-0.653245994865561
RMDN3	1.26540163588897	8.77639887679528	3.4315531790667797	0.000663917480269071	0.0143943561401934	-0.653683845723299
AQP1	-10.0792709247263	23.9745559484259	-3.4307557862566602	0.000665814502890128	0.0143943561401934	-0.6562482859959979
CPVL	-3.4197169176380497	5.98505474322794	-3.42995259883726	0.000667730424452596	0.0143943561401934	-0.658830795808587
BUD13	-1.69805657784149	11.1800669767174	-3.4297403136117595	0.00066823766820382	0.0143943561401934	-0.659513267194248
MAT2B	2.16421238383735	13.368014739563	3.4296185071182	0.000668528880404693	0.0143943561401934	-0.659904842452922
BHLHE41	8.90323427402448	20.0532208851053	3.4288855666961005	0.00067028367981955	0.0144159780006879	-0.662260773745541
CASP4	2.9067385057855297	8.329459307303129	3.4272063677072997	0.0006743202220592951	0.0144865706765893	-0.6676565328938578
PALD1	-1.05758007086095	2.3079208996630403	-3.4268262623149903	0.00067523708162323	0.0144900596532467	-0.668877578322611
TSPAN4	-2.06889324451998	4.983764322451741	-3.4252640441218705	0.000679017568299507	0.0145386972316169	-0.6738946904524059
KANK2	-4.12156677254391	9.813390709448	-3.4247692914854504	0.000680218955964351	0.0145444840724852	-0.675483155603632
MFAP4	-19.2087894276225	30.0648224757688	-3.42452930687842	0.00068080241493097	0.0145444840724852	-0.6762535784964229
HDAC5	-1.5944796407987198	7.81871986028642	-3.42283070409433	0.000684945486863145	0.0145843270739396	-0.681705154634932
GSTK1	7.552371535386059	39.3439398474811	3.42161237006728	0.000687931607779487	0.014613680486299999	-0.6856137679121851
CCDC24	1.5207938444186802	5.590922014751491	3.4209215660735297	0.00068963015107701	0.014619245785413999	-0.687829398193339
TBCD	-1.3262889213585	8.554521261929919	-3.4200320679878	0.000691823004867439	0.0146495618869725	-0.6906816849175089
CAPN1	11.1408012211781	66.6260270207505	3.41763270801376	0.000697770561254369	0.0147429938387804	-0.6983720553797479
CAPN15	1.29393238692645	7.61252816861698	3.41584560925902	0.000702231396287931	0.0148089298304617	-0.7040967241537092
PLEKHN1	2.35984885147146	7.05679088333621	3.41576495018434	0.0007024333580938549	0.0148089298304617	-0.704355035473558
PLOD1	-10.444167803990199	38.5076670083115	-3.4086649139091003	0.000720424917878209	0.0151218371287092	-0.72707048571263
B4GAT1	-1.7461951593221399	7.990449999452539	-3.40732245402012	0.000723874669812416	0.0151745183756537	-0.7313604788701809
STX6	1.97980542622722	11.6593678430689	3.4053476660080295	0.0007289773373063371	0.015251349390311001	-0.7376682647478509
BTN3A3	1.5050712976766003	4.59834645080858	3.40138220800075	0.0007393251630466951	0.0154342163929074	-0.7503241786034879
IDUA	1.88031086310305	5.95123165471368	3.3996822624131102	0.000743802956829582	0.0154950485120765	-0.7557453736955608
SLC44A4	11.835182482848198	22.102818453203103	3.3985360175087704	0.000746836516374103	0.0155235304474903	-0.7593993559445951
COX7C	18.654470573873898	110.241902771416	3.3962409964668705	0.0007529450304897769	0.0156335808168504	-0.766711905544468
NOTCH2	-2.0418899888587903	6.111289821556469	-3.39409840501589	0.0007586898386213191	0.0156873552294816	-0.7735345791312059
IPO5	-3.14896722151703	16.1371789764492	-3.39405668909885	0.0007588020935222519	0.0156873552294816	-0.7736673753051031
HYAL2	-2.3077425401912595	13.679697095647098	-3.39241778682086	0.000763224547361444	0.0157618179103483	-0.778883352055562
BUB1	-1.6783224175101	6.630092745568099	-3.38924636557527	0.000771850687714295	0.0158547211852842	-0.7889699977276451
CTXN1	-5.96551507865733	9.85923623146294	-3.38864087869176	0.0007735078825718031	0.0158717867443099	-0.790894728147718
RPUSD3	-1.58648928780038	7.63498770173371	-3.3870554941682203	0.000777862740757897	0.0159271333005639	-0.7959328382840021
TXLNA	-2.8249945412572597	20.100348661116602	-3.38697687072843	0.000778079303254958	0.0159271333005639	-0.796182633834866
ATOH8	1.98233432121522	2.3508527875608	3.38272338298973	0.000789879311464784	0.0161109735261302	-0.8096883109998609
METAP1	4.063687625989131	19.652417217301103	3.38158199060757	0.0007930740128043339	0.0161109735261302	-0.8133097424624319
CRISPLD2	-3.93278293726996	8.12935753617656	-3.38155468819373	0.000793150578137118	0.0161109735261302	-0.8133963539926671
MFGE8	-6.03842190462474	14.4196336465984	-3.38144219499214	0.000793466120306765	0.0161109735261302	-0.8137532095740061
MAOA	10.8401470377161	28.1594756147756	3.38133707009751	0.000793761100167706	0.0161109735261302	-0.8140866810069041
GTF2A2	1.80728507120289	13.153843017260499	3.38111236744243	0.000794391957161579	0.0161109735261302	-0.8147994377391901
HOXB7	5.1407695403721	19.821170533293103	3.37886667039423	0.000800722507360133	0.0162222325699986	-0.821920338293798
H6PD	-2.2974258297819703	9.90535214948624	-3.37771501826125	0.0008039871790466481	0.0162712094423287	-0.825570394505878
BCL2L12	-2.60834677502878	13.7371972126045	-3.37537255637995	0.00081066581882364	0.0163718693126465	-0.832990998847698
PCED1A	4.30255040453228	18.9416220114027	3.3713878058226	0.000822145667887378	0.0165168720684571	-0.845603017237003
EPHA2	14.416063976252598	41.155315778155	3.3708015050119196	0.000823847489541619	0.0165337668590766	-0.8474575170814671
ABCA7	1.3748370520463502	3.53434882185065	3.3696247130148897	0.0008272732010963231	0.0165776724247263	-0.8511788545531701
ARHGAP29	-1.40774446483829	2.50641162245367	-3.3686428393926096	0.0008301416401981151	0.0166080211892135	-0.8542828705210079
RPL4	54.178164117939396	278.50723391838	3.36829008985445	0.0008311744197666349	0.0166113797149199	-0.8553978164191709
USP14	-2.8549715711175097	15.2803496228625	-3.3678088278056	0.000832585387866461	0.0166222816625398	-0.8569187782695771
HSD17B8	3.15194209780031	12.8076265498933	3.36604712418245	0.000837769412922852	0.0167084105343679	-0.86248465189416
RAC1	17.9204711549312	133.366890448771	3.3655730101551096	0.000839169674257525	0.0167189758960478	-0.8639820851429979
ACAA2	-3.8175416833998597	9.270995741036868	-3.36435907330565	0.000842764887606056	0.0167558410262546	-0.867815256003331
ST6GAL1	-1.94637326857125	3.24451576526587	-3.3639922303097896	0.000843854153684006	0.016760147751453004	-0.868973356436912
SRPX2	6.0249606236999	15.901086993413902	3.3634512698286496	0.000845462818265085	0.0167747509169413	-0.870680917873909
KLHL5	-1.54962962165215	4.60582578534115	-3.36277386069317	0.000847481269020968	0.0167974460813382	-0.872818819700078
GSTO1	14.549360209743302	59.456320561047605	3.3621348826839603	0.000849389318904533	0.0168179085143098	-0.8748350612214421
QSOX2	-1.55483867989832	5.60166937649609	-3.35921690402937	0.000858153625242695	0.0169390529562294	-0.884037910670375
C6orf132	2.0175269307541	7.74664850687528	3.35825263212898	0.000861068324440976	0.0169791357692129	-0.887077419062977
MOXD1	-1.90664278767541	3.09223119905069	-3.3576544542783	0.0008628810617628459	0.0169800140084193	-0.8889625390143392
PLCG1	-1.825544099701	9.1737456023801	-3.35734578151667	0.0008638178624238809	0.016981050016083	-0.8899351781024221
NKD2	-3.11302971759918	4.89333241064667	-3.35637076105253	0.000866783204325063	0.0170146209522031	-0.893006949681282
FOXK2	-1.02295659406758	8.09679482875543	-3.35620200584827	0.0008672974024891621	0.0170146209522031	-0.893538522358126
LRATD1	6.67626937579787	14.9793844653649	3.35450078731376	0.000872496907366553	0.0170817284433048	-0.898895891571259
MTMR12	-1.1801705899168797	5.60134477071702	-3.3541308286112703	0.000873631461335171	0.0170865232651765	-0.900060603196898
WBP1L	-2.21645351950328	14.646653898744098	-3.35177383119272	0.0008808919764375359	0.0171586321495531	-0.9074781090778
RAB27B	2.4312736675038797	6.02013771814286	3.34986674150283	0.0008868076479763689	0.0171807996281278	-0.9134761525851619
PIK3IP1	5.55293955197901	17.7551915871369	3.34727725440799	0.0008948992615047971	0.0173085953841502	-0.921615274444347
COBLL1	1.20403385498295	3.21748155613292	3.34621920663615	0.000898225168933789	0.0173380026075803	-0.924939160298933
MID1IP1	4.051997662476141	18.0861150333381	3.34451934768017	0.000903592659970915	0.0173753961715567	-0.9302772396839641
NACC2	-1.14952166154011	3.47301729515926	-3.34407551051327	0.0009049990291876961	0.0173753961715567	-0.931670603853323
ROGDI	1.6932146902476102	8.96901830656505	3.3438202634824403	0.0009058087423635461	0.0173753961715567	-0.932471836956148
COL15A1	-5.52981507866863	11.9663420994344	-3.34353007690277	0.0009067301119767971	0.0173753961715567	-0.933382677015352
CD99L2	-2.32109483441556	5.98154599438567	-3.3434023151636802	0.0009071360438590131	0.0173753961715567	-0.933783673005242
GSN	-11.149350791967	37.152881106215204	-3.3433193003751898	0.000907399893786907	0.0173753961715567	-0.934044217425673
EPS8L2	6.41327188992275	28.0949951327197	3.3408475298416094	0.0009152888295884269	0.0174999340830034	-0.941799149998298
C7	-3.55948517965784	3.39820501351794	-3.33945338737702	0.0009197664869225311	0.0175596770853222	-0.9461707476886679
HYOU1	-5.296033695550371	24.7367678412322	-3.3390500469508906	0.00092106571649451	0.0175670190178685	-0.9474351771626329
KLHDC7B	30.320074549907698	41.3400357105818	3.33696456468817	0.000927810691642717	0.0176781072854068	-0.9539706460724209
GYPC	-2.7425478640877903	4.40391332817511	-3.3363339577412097	0.000929859261618295	0.0176894050919596	-0.955946079472343
TAX1BP3	7.49501196988258	35.1451367955109	3.33615334142485	0.000930446780661116	0.0176894050919596	-0.9565118116030659
GAPDH	239.669160095309	1144.2113129735499	3.33593215238382	0.000931166747264977	0.0176894050919596	-0.9572045875691361
HOXB8	4.16980157845974	5.29416359174163	3.3341505201062103	0.0009369848531687449	0.0177823429742677	-0.962783176315585
C8orf33	-2.7439052409287994	16.1451469964605	-3.3295585231097102	0.0009521367228304311	0.0179514073260417	-0.9771485319130909
PKN1	-6.862831239171141	24.587610512753702	-3.3259210074791	0.000964300537530193	0.0181394281330116	-0.9885146865309301
BTBD10	1.5554589510896901	10.286037018869	3.3246866443172203	0.0009684609582047651	0.0181917687787933	-0.9923690414905749
PYCR2	3.94486877996795	24.185480475588196	3.32370469032971	0.000971782544678234	0.0182006435286755	-0.99543427358373
FUCA1	11.530294354319699	40.9760986567864	3.32355404824396	0.000972293046986414	0.0182006435286755	-0.995904436916803
UQCC2	1.8069708707971002	9.36080892544782	3.32315483001221	0.00097364714072215	0.01820824438628	-0.997150324668055
FUOM	-4.76442342966987	9.880675335852391	-3.32121885489054	0.000980238602612577	0.0183136795737132	-1.0031901499008
NMI	2.28706502360497	10.039081394188301	3.3207661314454104	0.0009817859734773632	0.0183247632717262	-1.00460207052371
ID2	8.98538393735663	21.7117442601862	3.31935245862737	0.0009866324148455439	0.01839734190245	-1.0090097607611601
CDR2L	-4.681476287664481	16.2553498440269	-3.31880028487705	0.0009885314429170279	0.0184148738047182	-1.01073090237129
SLC39A14	-2.43459964075955	6.331827735047799	-3.31724327999107	0.000993904582927874	0.0184970265694891	-1.0155826770228
ARSA	3.72161623790955	17.962357359867198	3.31532509422891	0.0010005614551227302	0.0185848968153648	-1.02155697227633
TAP1	21.785512152245197	49.05541557372621	3.31397188821154	0.00100528252089458	0.0185881084842642	-1.02576964562165
MAP1B	-2.3267123778829597	3.1490064393074304	-3.31378811769954	0.00100592525361646	0.0185881084842642	-1.02634161749742
CCDC8	-1.58901414539357	2.70991630270666	-3.3136699463440196	0.00100633875664686	0.0185881084842642	-1.02670940112992
SNX33	1.53817257130644	8.30300070528958	3.3135599517105097	0.0010067237897708199	0.0185881084842642	-1.0270517253045
KIF2C	-3.30845609306958	13.907438697211099	-3.31333571152772	0.00100750916026862	0.0185881084842642	-1.0277495701000798
C1orf53	1.1502010563812	4.37889093398198	3.31249483325213	0.00101045929423931	0.0186246460702114	-1.03036602147507
FNDC4	-2.4927444630608	5.2060095284728805	-3.3112660786680497	0.0010147846889437	0.018686437905899	-1.0341882501098199
PREX1	-1.7853636665844699	4.78822949467711	-3.31066172191421	0.0010169184183706301	0.0186927638911084	-1.03606770306673
TRAPPC1	13.9603693764187	84.67420963751799	3.31029324819171	0.00101822138881272	0.0186927638911084	-1.03721343861973
SLC22A18	1.003799954897	3.77537100830913	3.31012553482598	0.00101881495836205	0.0186927638911084	-1.0377348882355402
BRD2	5.022566864633291	34.173970397482	3.3100672437755696	0.00101902133676927	0.0186927638911084	-1.03791611926922
BATF2	3.4923074284855495	4.66794982018951	3.3084357550109	0.00102481337445665	0.0187453006379186	-1.04298731238671
ALDOA	59.2289406844195	280.243715621196	3.3070430002808497	0.0010297820536241	0.0188144014424248	-1.04731457629335
PLEKHA4	-2.43622294736523	6.3856808162386205	-3.3068281947727	0.00103055036537701	0.0188144014424248	-1.04798182008704
DNAJA4	3.5763400895456896	12.974724501768401	3.30654116409998	0.00103157784177614	0.0188152744816264	-1.04887335085683
EMC7	4.22046865490908	34.4100766121673	3.30618653206246	0.00103284862330283	0.0188205793730116	-1.04997475377816
TTK	-1.26722507270852	4.88082341362417	-3.3055453844789398	0.00103514979101244	0.0188344925401389	-1.05196572296249
RBPMS2	-2.88373568011734	3.93839904761924	-3.30542748324424	0.00103557347299733	0.0188344925401389	-1.05233180449548
TMEM40	4.93377155485242	12.260019906868902	3.30301514332955	0.0010442777416070001	0.0189568982091721	-1.05981937721453
SPATA20	3.35347774957115	13.493691556144302	3.3023457055113594	0.00104670524279664	0.0189830225619945	-1.06189630589736
TSPAN31	2.26920055640192	7.1260708489658	3.2996771126851	0.0010564342211814	0.0191053443050942	-1.07017165703541
BEX4	11.7617942944999	34.642874014168	3.29895399467996	0.00105908494174259	0.0191352637733849	-1.07241297059598
NEMP1	-1.33443786322618	5.55745623092243	-3.29671637618505	0.00106732651910751	0.0192261294195115	-1.07934556003816
PTGIS	-5.377907152287099	6.54344252171723	-3.29652949061495	0.0010680175423291901	0.0192261294195115	-1.07992436795519
PRELP	-2.72413672179387	4.03672325398181	-3.2962318400564103	0.00106911898511469	0.0192261294195115	-1.08084616489244
HENMT1	-2.04196211550934	8.729366043694231	-3.2960634464994705	0.00106974258514119	0.0192261294195115	-1.08136762974675
ERC1	-1.00761075140985	3.79461185834327	-3.2952139062969397	0.0010728937811925801	0.0192399607484451	-1.0839980200094799
SLC2A1	51.043929521626794	115.46729768596501	3.29367499001659	0.00107862403635165	0.0193246765318748	-1.0887612618354199
CENPF	-2.14025835109927	8.02774555682824	-3.29294243596066	0.00108136172049956	0.019355669341952	-1.09102791944455
PXDN	-3.84591558594448	7.16834832311849	-3.2922827768184604	0.00108383250261544	0.0193689583938246	-1.0930686193447299
CBX1	-5.4984214416923	28.4817615287943	-3.29170844979929	0.00108598793680713	0.0193689583938246	-1.0948450242060401
COL18A1	-6.75004093684945	17.6085546267817	-3.2915350396039598	0.0010866395225149	0.0193689583938246	-1.09538132785948
RRP1B	-1.96370219684114	10.578652074277699	-3.29140016123169	0.0010871465765147801	0.0193689583938246	-1.09579844615492
DACT1	-1.19666939477359	2.11188670833204	-3.29009702004875	0.0010920568568746599	0.0194173860155845	-1.09982764588524
MLF1	-2.0730174445753797	6.538114078038911	-3.28965474402174	0.00109372804234628	0.0194173860155845	-1.1011947826056498
PDGFC	-1.1140439226026202	2.8146073818989104	-3.28957234961305	0.00109403964032818	0.0194173860155845	-1.10144945600505
CD40	6.471251454868269	13.233521058082099	3.28937021673209	0.0010948044126463	0.0194173860155845	-1.10207420429042
SPON1	-4.3539376293077305	6.3030990626444	-3.2893397392816097	0.00109491976751422	0.0194173860155845	-1.10216840024251
EPB41	-2.2190883040796203	7.399788779076	-3.28631648474034	0.00110641879687754	0.0195671081149449	-1.11150820701445
AP2A2	-1.1717482672443602	7.54647706828848	-3.28603205270355	0.00110750639126026	0.019568323597557	-1.1123864917155701
COL5A1	-17.3797089499884	31.7276398042491	-3.28490699467569	0.00111181805436823	0.0196264499560628	-1.11585980336551
LTBP1	-6.25579273327273	15.101257270422499	-3.28401742739686	0.00111523824885372	0.0196687472979656	-1.11860530588518
CROT	5.39858295219101	13.937404584521	3.28225531119012	0.00112204205450241	0.01974546713345	-1.12404171294789
POLR1D	2.76623586331047	18.9794723963009	3.2799335414625497	0.00113106559448885	0.0198204797515994	-1.13120053127835
OLFML2B	-5.14790149598681	10.1274846123242	-3.27911840033489	0.00113424957339961	0.0198220175675276	-1.13371275805963
MIER2	1.4298668165219297	9.89266728754774	3.27863948234881	0.00113612412597054	0.0198367272394456	-1.13518848576177
PALLD	-6.19278925014664	14.8454459771057	-3.2741671855009105	0.0011537686202080198	0.0200718117026407	-1.14895949594548
ERCC2	-1.03725656529254	6.061917323571651	-3.27109116618606	0.00116605159908072	0.0202412620880029	-1.15842080616322
SLC4A2	-2.06066970224492	11.8757748186428	-3.27093692637742	0.00116667068267308	0.0202412620880029	-1.1588950002348
RAP2A	-1.53328371657157	6.838535844146089	-3.2704854411974598	0.0011684845946923301	0.0202442488638675	-1.16028292249471
CAVIN3	-5.2325168344732305	12.771610970526499	-3.26968537774515	0.00117170540130304	0.0202442488638675	-1.16274197354788
IL17RC	-1.9959943829589701	8.52401932834373	-3.26918095050708	0.00117374029924441	0.0202442488638675	-1.16429207375781
NFIC	-2.47283567570275	8.95330318739934	-3.2691226445458	0.0011739757211742699	0.0202442488638675	-1.16447123286251
GANAB	-13.7060252625401	93.6006165758378	-3.26737083744688	0.0011810694517295599	0.0202442488638675	-1.1698526736168402
ISOC1	4.05469492960461	16.054890009883803	3.26732004628954	0.00118127571619108	0.0202442488638675	-1.17000866017906
PPP2R2A	1.20460306292024	6.90723213060051	3.2672431865098	0.00118158790967049	0.0202442488638675	-1.1702447026736102
SMPD2	1.7838674986715501	9.2809279767283	3.26692636085716	0.00118287561842493	0.0202442488638675	-1.17121764404161
RNF26	-3.5224963001365097	20.1525563100205	-3.2668976806495498	0.00118299225071742	0.0202442488638675	-1.17130571382299
TNS2	-1.4829987492445502	4.69872304447298	-3.26687507128726	0.0011830842025408901	0.0202442488638675	-1.1713751410338502
LMCD1	-2.13011742401315	3.83296132376832	-3.2633345602186297	0.0011975654663731199	0.0204448376419219	-1.18224148516594
GKN1	3.39820240341309	1.16304457777205	3.26183220855438	0.00120375986104496	0.0205323373811985	-1.1868490555875502
CFL2	-1.24206646842331	2.77276571272066	-3.26120335010882	0.0012063615381062301	0.0205402302312662	-1.18877710950127
ARHGAP35	-1.5648723336197001	7.55994879358723	-3.25856589513157	0.00121732995878463	0.0206691445733134	-1.19685960935644
POLR1H	1.44398747358967	7.320756152537941	3.2580912176718098	0.00121931379785296	0.0206691445733134	-1.1983136054448602
MEAK7	1.27413383211667	5.56452588313939	3.25769597774808	0.0012209679269529	0.0206789329850595	-1.19952412169356
ESYT1	-5.232674051545461	27.732674446918697	-3.25547219935345	0.0012303135695917698	0.0208188567555767	-1.20633238356909
EHD3	2.53550087633158	6.19356150352486	3.25465279531143	0.00123377388210505	0.0208223736201314	-1.2088399413711899
HSPG2	-3.83203736549932	11.0253563891974	-3.2487141530685197	0.00125912346906941	0.0212129169710063	-1.22699566239349
ANXA8L1	1.43335840260363	3.77327364693337	3.24795663162979	0.00126239150240764	0.0212493349651544	-1.2293093152131298
CLMP	-3.0801845033287205	4.82443653703072	-3.24663838809721	0.00126809730382391	0.0212894028122744	-1.23333433165905
ATP5IF1	7.699198682753139	52.204152801119	3.2455312628753705	0.00127290776921502	0.0213371103629154	-1.2367135428757
ITGA5	-9.71294823117171	20.709456154024803	-3.2454731096866696	0.0012731609120015099	0.0213371103629154	-1.23689101019721
RPRD1B	-1.61999177180466	9.454949158338911	-3.24416217778444	0.00127887983680929	0.0213958449310191	-1.24089081084516
HACL1	-1.63239770803874	6.31290158916223	-3.24415903541188	0.0012788935739253301	0.0213958449310191	-1.24090039674097
OLFM2	-3.6768670792164397	5.617018010076901	-3.2401991679755002	0.0012963134932525199	0.0216340133586209	-1.25297310457188
TMEM119	-3.20718347564704	5.828333841043941	-3.23888270667822	0.00130215327901536	0.0217093366985842	-1.25698359718699
FUNDC1	2.16328010520288	13.7900631351393	3.2382409635738902	0.0013050088612994802	0.0217192375997554	-1.25893805655139
CYP4F11	4.88582420560193	6.13977384647075	3.23747529942962	0.00130842344808444	0.0217572127652898	-1.2612694440296
SLC25A28	4.835664119598049	25.765755626420002	3.2366660205695896	0.00131204153668708	0.0217985032470693	-1.26373306792098
TSPAN3	4.21152351016917	18.7815328511985	3.2357053471867903	0.0013163485034383198	0.0218511576119588	-1.2666568138075902
MIDN	5.583592078372621	30.255647154574298	3.23467148652371	0.00132099821769195	0.0219094056727043	-1.26980238295145
DEGS2	2.81438141815853	5.18930893257813	3.23337275594771	0.0013268607240137	0.0219876506172623	-1.2737524833024199
CERS4	-2.09226328827752	4.61100067320751	-3.23070021562055	0.00133900053768375	0.0221125058699519	-1.2818763155468
ARCN1	-5.11602605116002	40.1023303597441	-3.2258786913967	0.0013611624970136802	0.0223822661966136	-1.2965164240398401
UBE4B	-1.1998673872866201	7.08131683756515	-3.2255273004239	0.00136279085831922	0.0223882151638859	-1.29758258092594
NINL	-1.0232273995983199	2.5011444640128504	-3.22391522032631	0.00137028445323116	0.022417106651412003	-1.3024723912478702
A2M	-39.5696938631997	74.8216300973537	-3.22234006822044	0.00137764322485487	0.0224609641566745	-1.30724795562707
TLE1	-2.51058365971264	8.32092890768061	-3.22120863829454	0.0013829515815731198	0.0225283868326491	-1.31067687467115
RAD54L	-1.00981012498947	4.08638508319794	-3.22017547857095	0.00138781541534331	0.0225862451445525	-1.31380697972608
MED8	-3.1283854350327998	19.500383759838602	-3.21974518012488	0.00138984581000111	0.0225862451445525	-1.3151103499980201
FGF7	-1.21833218607614	1.6620360408308998	-3.21970589176654	0.00139003133192029	0.0225862451445525	-1.3152293458812099
KRT13	377.86923898655897	509.21059451518204	3.2183646186977	0.00139637866853291	0.0226669473695849	-1.31929094548321
FSTL4	1.3586049779567702	2.4005489586847704	3.21802335211594	0.00139799792799839	0.0226669473695849	-1.32032410220447
WIPI1	-1.4620069656059	7.1250114269910805	-3.2169064464878603	0.00140330964064921	0.0227214925051769	-1.32370471760747
AMOTL1	-1.89614302178458	5.72981855628299	-3.21670490572574	0.00140427010328257	0.0227214925051769	-1.3243146166247401
CTHRC1	-15.305990168241902	32.332978653143805	-3.21530943782763	0.0014109370543108199	0.0228101490446916	-1.3285365639543898
NUP188	-1.8906662322452599	10.0738395981801	-3.2135973705765	0.00141915659814893	0.0229237355963401	-1.33371400396986
IFNGR2	7.28026453907358	43.74803792700789	3.21204873431356	0.00142662966679885	0.0229700785130745	-1.33839496545055
GALK1	-1.80301004613731	8.21059229316487	-3.21201155584216	0.00142680952130053	0.0229700785130745	-1.3385073161223502
RASA3	-1.5717975288476798	4.15432748679398	-3.21121828722457	0.00143065203963746	0.0229933916931189	-1.34090422350777
DSCC1	-1.22217067454651	4.29562467791913	-3.2103704481804	0.00143476947698267	0.0230171072920569	-1.34346539883541
TAP2	3.4052246241091697	10.016872853336402	3.20984864852786	0.00143730898781401	0.0230233164470024	-1.3450413471113998
CHCHD3	-1.93855462001999	12.655678856552802	-3.2091969333601997	0.00144048661680661	0.0230347500133351	-1.3470093277625803
DLGAP4	-1.8424484549342799	13.3096434292287	-3.20873997060784	0.0014427185485276599	0.0230347500133351	-1.3483889899399497
UNC93B1	5.949738629714121	24.4913405128055	3.2076720197243302	0.00144794719738347	0.0230694829081026	-1.35161262228547
HDLBP	-6.017395506628491	42.088724338976995	-3.20682886279639	0.0014520876423892901	0.0230814915492254	-1.35415699142622
OGDH	-4.05957630932884	26.968509495989398	-3.2067276755254706	0.00145258527273291	0.0230814915492254	-1.35446229861773
STAP2	8.08600560290475	30.767523100490102	3.20541201219392	0.00145906997128088	0.0231389769081737	-1.35843115193301
IL27RA	-2.30987929145284	5.47239249892009	-3.20434991405895	0.0014643244123134802	0.0231578057007611	-1.36163397073701
KLHL21	-1.6991718930817301	7.82267354030467	-3.20351284455102	0.00146847791422172	0.0231578057007611	-1.36415749423089
HSPA13	-1.7100479756208797	6.792317168600969	-3.2034853839102	0.0014686143571554199	0.0231578057007611	-1.36424026957544
EGR2	-1.70702901982075	2.73052375867833	-3.1985578325229596	0.00149328848377253	0.0234890242582598	-1.37908263855183
PARP4	3.7710920325741695	16.330648202704	3.1972050231469304	0.0015001292832167801	0.0235519056190658	-1.38315367406813
KLF9	-2.10451224917182	5.50429020761749	-3.19690565375153	0.0015016470262392099	0.0235519056190658	-1.38405435172924
SUN1	-2.00375594348536	11.2355905303725	-3.1967983835526494	0.00150219121021325	0.0235519056190658	-1.38437706357723
CSGALNACT2	-1.29580109921613	5.7779071833034505	-3.19460746821164	0.00151334574865214	0.0237074375600432	-1.39096597243983
GBP4	6.20207257404194	11.946143790313199	3.1916758947090695	0.00152839100008481	0.0238652662988853	-1.3997756249319397
MXD1	3.0600570899235695	7.82080771447867	3.19077602657857	0.00153303691804998	0.0239183647831584	-1.4024782755592298
MICU1	-1.48529757946718	11.7080968221402	-3.1900734320891297	0.00153667340766296	0.0239314900352634	-1.4045879354238302
SEMA4A	1.74500522482928	7.469366490658441	3.18981464578836	0.0015380148426683699	0.0239314900352634	-1.4053648745189198
RAP1GAP2	-1.12759448023917	3.22464585048316	-3.1896512553375698	0.00153886234476467	0.0239314900352634	-1.4058553814293102
IL17RE	-1.7814686476258002	4.65194790594679	-3.1870649743912103	0.00155233495149519	0.0240630710883105	-1.41361636447479
NDUFA4L2	24.8001621110254	34.677684581631304	3.18635386808555	0.00155605835317784	0.0241013360734948	-1.4157492261442501
COLEC12	-1.3535543133371601	2.01124390178652	-3.18584162976346	0.0015587455817088198	0.0241055377022192	-1.41728533225548
CAPN7	-1.1158171048703	5.91764006041723	-3.1856010048077703	0.0015600093928328199	0.0241055377022192	-1.41800684031385
AEBP1	-33.3314944256391	64.9031280077336	-3.18556018239084	0.0015602238944056699	0.0241055377022192	-1.4181292402105201
SELENOM	-7.15429871937423	16.5821080869932	-3.1853459470991097	0.00156135004173491	0.0241055377022192	-1.4187715682411497
PLXNA1	-3.4894924169740804	13.9877110425721	-3.18362166665001	0.0015704412751432401	0.0241875662633528	-1.42393987760953
HTRA1	-23.6356915074442	57.272097218875196	-3.1828307035515397	0.0015746279597426802	0.0242109230609429	-1.42630980058615
ENC1	-3.65772095752692	12.7595397923273	-3.1818131406603	0.0015800292427347801	0.0242122052618706	-1.42935785221799
B3GNT3	9.50845872836364	34.5160258003606	3.18178571765421	0.00158017504231118	0.0242122052618706	-1.42943998348591
DEF6	3.0443282561294707	15.087521711549	3.1816746729068797	0.0015807655597468802	0.0242122052618706	-1.4297725530721297
TATDN2	-1.27264324123442	7.4876614146881	-3.1816558577801	0.00158086563565478	0.0242122052618706	-1.42982890168874
COMT	11.308212784755002	40.8721329337259	3.1812248971363504	0.00158315947883897	0.0242280166936902	-1.4311194807740801
RPL34	30.757045370108198	138.952024424248	3.18064189746056	0.00158626746455843	0.0242562523282716	-1.43286510081679
PLEKHA7	1.28512769251257	4.53917550219033	3.1802442375303706	0.00158839063318022	0.0242693957842954	-1.43405560185103
FKBP9	-4.131997690345971	20.158507603407603	-3.17983162388064	0.0015905964179835199	0.0242837796532524	-1.4352907216756103
ZNF513	2.4689151133203	12.629069191275802	3.1757025661411102	0.00161282630905713	0.0245256865334531	-1.4476422973946599
PRXL2B	3.13354539284047	13.6238969127724	3.17515626572366	0.00161578887112773	0.0245318901651219	-1.44927534918546
SCRN1	-3.14614176420084	11.7303532076371	-3.17322483543325	0.00162630328651801	0.0245911952185174	-1.45504682384208
UBE2I	1.40323058614793	12.933125275336002	3.1732062245563	0.00162640490809946	0.0245911952185174	-1.45510242042413
SLC25A32	-1.45750351500586	7.8174884542923895	-3.16985250947155	0.00164481338417365	0.0247778917321766	-1.46511598147255
BGN	-83.81295786035521	176.303791446302	-3.16981857596255	0.00164500062417497	0.0247778917321766	-1.4652172492245399
SH2B3	-1.74568851524376	4.983948313042441	-3.16960438432579	0.00164618295586053	0.0247778917321766	-1.4658564374837801
EPHB4	-3.5777937345191497	15.763646274563198	-3.1688671001511497	0.00165025874718165	0.0248197881741353	-1.46805631944
DCN	-12.1350342304365	21.6634277097025	-3.1678850767133904	0.00165570196139789	0.0248432905239124	-1.47098569190483
LUM	-55.958047115435	113.490836692582	-3.16715557517462	0.0016597562127072698	0.0248846821399342	-1.47316123506334
HARS2	1.4682036745879399	11.1129570290715	3.1659392262948196	0.0016665365441976801	0.0249668493509053	-1.47678761353116
DCTN1	-1.98264916134248	13.572366260637601	-3.16558683496689	0.0016685056639557801	0.0249768665486631	-1.47783797346385
ATP8B2	-1.8223715118200299	2.8041198890568197	-3.16448014253889	0.00167470370527292	0.0250320553856243	-1.4811359301390299
CYP27A1	-2.95013209804007	5.8784528534128295	-3.16446314208404	0.00167479908208514	0.0250320553856243	-1.48118658316865
STN1	3.70000029457467	17.565905094966098	3.1638567692699997	0.00167820426765087	0.0250634456955697	-1.4829931084160701
SORBS3	-2.73421848401736	11.103087122060002	-3.16349644840508	0.0016802307355192401	0.0250742125146717	-1.48406643231641
MFSD2A	3.1942683130979903	9.553839960020289	3.1625146434719698	0.0016857639428296699	0.0251372533276293	-1.4869904447719398
GNB4	-1.27809338520577	3.3556596910732104	-3.1606671911027795	0.0016962213671152199	0.0252259699312349	-1.4924901952936203
B3GNT8	1.5622818908590002	4.48673579430665	3.15973461314547	0.00170152290364128	0.0252259699312349	-1.49526526396784
TMEM63B	3.01274416183629	18.923362178347197	3.1596120083732098	0.00170222102628764	0.0252259699312349	-1.4956300407463798
COQ8A	-1.3246304108593998	6.29937964447848	-3.1578531438571695	0.00171226531365557	0.0253357223529035	-1.50086158041944
VAMP8	31.798472184271198	178.9116402814	3.1574809238808705	0.00171439794042768	0.0253477496873394	-1.5019683515384499
EAPP	1.9327741894558799	15.2898809356448	3.15547110643888	0.00172595557656265	0.0254833856735791	-1.50794227047697
ICE1	-1.2202234105000802	5.91909612710678	-3.15482399450835	0.00172969213215816	0.0255037940593891	-1.50986495789387
RAI1	1.64298078685329	7.66495212253614	3.15335573936981	0.00173819784411707	0.0255814772368677	-1.51422602392402
JAM3	-2.1904258597488897	3.54428686640198	-3.1524646568705896	0.00174337876009843	0.0256281580207923	-1.51687181112145
MAGIX	1.08422406535357	2.4631036756574	3.1512581862057902	0.00175041611507651	0.0257022109374308	-1.5204529129875999
ANKRD52	-1.38759306216901	7.20715346416733	-3.15073337328229	0.00175348552925013	0.0257079718128076	-1.52201028096961
LIMS2	-1.49741578516112	2.7514179253186204	-3.14981456608032	0.00175887121735785	0.0257476224089748	-1.5247362235528898
GAL3ST4	-1.2459809024472	3.69201150705533	-3.14943536512622	0.0017610983920251602	0.0257605907975896	-1.52586102749468
THUMPD3	-1.39461197385371	7.87322170136627	-3.14877431199159	0.0017649872036777398	0.0257764840780181	-1.5278215675427902
RNF10	3.7003558986828704	33.548416330159895	3.14853458578268	0.00176639941041717	0.0257764840780181	-1.5285324469321697
CAVIN1	-25.553976868253102	68.5903370890953	-3.1483156692855	0.00176768993974447	0.0257764840780181	-1.5291815727463502
FBLN2	-8.08069008028736	13.7288671736796	-3.14811130801332	0.00176889545011079	0.0257764840780181	-1.52978750111242
GABBR2	-3.5928892628649103	4.0333674696660395	-3.1470032448782796	0.00177544504281045	0.025832725372892003	-1.5330722432521298
PHF19	-1.59947638014222	5.39257448811978	-3.14161193119384	0.00180763277946178	0.0261426168391136	-1.54903859278707
CTNNB1	-10.7261379775585	57.393043244948	-3.14013215269987	0.0018165611835567602	0.0261928484169603	-1.55341640506692
TP63	8.29505608034682	21.369654031963602	3.1396228440032297	0.00181964355131023	0.0262176099373325	-1.55492270330424
MPDU1	3.1761713973865002	20.9395873961981	3.13739447275867	0.00183318660957405	0.0263534296582928	-1.56151046173003
SEPHS1	-3.46332796931328	17.5547678630691	-3.1343386226241403	0.0018519099180001198	0.0265431208097838	-1.5705372855251003
NFIX	-1.90976860304225	6.48541689165766	-3.13340460135928	0.00185766779563295	0.0265985915962533	-1.5732946698793
PRRG2	2.1372804590333603	9.82467583104976	3.1315950545944906	0.00186886995016632	0.0267263710073674	-1.5786345293832902
COL5A2	-15.809468027608599	32.2290250785506	-3.1301944610142702	0.00187758317475571	0.0268142567625773	-1.5827655828627398
NCBP1	-1.3654998877181699	8.612373013934011	-3.1301584438194703	0.00187780773433648	0.0268142567625773	-1.5828717925073799
ADGRG1	6.89922578789946	30.2634609474489	3.12902929978709	0.0018848602786643899	0.0268750011225154	-1.5862008911136
PDIA5	-1.7832920230548301	9.07041315952617	-3.12860262093754	0.00188753163303837	0.026893125032740998	-1.5874585877986003
SCARB1	2.43908784894171	7.88863337446549	3.12685028564835	0.00189853931574405	0.027009885998652	-1.59262213774383
FZD7	-2.61886683738939	6.426219706091571	-3.1230634385382796	0.00192252966571629	0.0272905430596801	-1.60377133480591
ZNF185	6.2274496340543495	16.1396441512345	3.11993748046144	0.00194254337080025	0.0274606921257524	-1.61296508113534
PSMA5	3.29086710457031	21.884880838207604	3.1197385090489305	0.0019438237473855897	0.0274606921257524	-1.6135499793672
PDLIM7	-6.1871638957942805	19.3190344308431	-3.1194274188277102	0.0019458271647864699	0.0274606921257524	-1.61446439209801
TRIO	-1.44881487857809	5.232617017203	-3.1194076573845897	0.0019459544925101	0.0274606921257524	-1.61452247558563
CCDC9B	1.7431330000248502	4.33856826039316	3.1160107866061	0.00196795580561879	0.0277100873920195	-1.6245014768711799
CUEDC1	-1.7541180390604498	7.187915633941901	-3.11529962567097	0.00197259087024334	0.0277550038490063	-1.62658934980772
CAPS	12.3058752900681	33.2813843491162	3.1149581211500097	0.0019748202343926103	0.0277660303233854	-1.6275918002907401
ELF4	3.5380823372069705	19.3890333210894	3.1127608515279706	0.00198921976916894	0.0279275986013587	-1.63403915653767
ARV1	1.4228922636891899	9.671351810317331	3.1123403713731803	0.0019919863370210897	0.0279460113870176	-1.63527246115154
SFT2D1	1.5386159484625501	13.413777961809002	3.1105213033304397	0.0020039958655355	0.0280939741558211	-1.6406061211704202
PRPF38A	-1.21552795643517	9.07461816557543	-3.10810790147437	0.00202003216005747	0.02823905874206	-1.64767784482647
ELMO3	5.56770447545487	21.048085054428302	3.10785841464302	0.00202169664533648	0.02823905874206	-1.64840859096104
GPR107	-1.7479715003074199	11.083593510504501	-3.1054226490131	0.0020380136927212397	0.0284050007129203	-1.6555400121343702
SPARCL1	-19.6781270019424	35.853153157220504	-3.1045535230209906	0.00204386521681035	0.0284246744055464	-1.6580833482308301
TKFC	1.07467638816436	6.66132729750736	3.1041509792766897	0.00204658064396487	0.0284402935862964	-1.65926108864095
IL1RN	13.270364844018399	31.476215049586703	3.10394818090486	0.00204794991304008	0.0284402935862964	-1.65985437001993
MFSD5	4.02328522809743	22.175616733873202	3.1027837673715495	0.0020558282299033602	0.0284949234754961	-1.66326011867587
B3GALT6	-2.3239194640762	12.650085749216302	-3.10203975070364	0.00206087678411697	0.0285167143485234	-1.66543562870357
MAPK11	-1.35420144255175	4.50962530720969	-3.1014203115704	0.0020650887196009397	0.028554423289169	-1.66724649487747
TNFRSF1B	-4.44787306508714	13.0069251029878	-3.09574300529733	0.0021040630166870604	0.028996499643917005	-1.6838274996356202
DHX58	1.5722148428919398	6.89626528330843	3.09562479954148	0.00210488164010419	0.028996499643917005	-1.6841724216531
UNC119B	-1.24913378784129	4.958986198798001	-3.09518150247474	0.00210795426682979	0.028996499643917005	-1.6854658420607
DNAJC9	-1.2966712810627299	6.5211671595423795	-3.0948025136385398	0.0021105844272086	0.028996499643917005	-1.6865714889044898
PKN3	-1.20252732963238	4.5265019993101205	-3.09382609276733	0.00211737465569786	0.029025963439715998	-1.68941946708379
PITHD1	-3.09053957862666	25.0344673553441	-3.09378401361219	0.00211766773416348	0.029025963439715998	-1.68954218236983
COX7B	5.37901675642367	38.092752031554106	3.08808467303088	0.00215771008734068	0.0294743811788514	-1.70614848599617
TAGLN	-65.8888306949319	96.9275710482749	-3.0877875581264598	0.00215981654096153	0.0294821865570058	-1.70701339832298
WDR5	-2.74413217964235	16.5017661283356	-3.08659532987355	0.00216828812094471	0.0295768051497614	-1.71048322245375
COX16	1.38699650325371	12.2654274005569	3.08603484943039	0.00217228126695053	0.0296102441540467	-1.7121139870608701
TPM2	-40.2789184376927	62.5620449249551	-3.08478911835051	0.00218118073135856	0.0296503511633859	-1.71573753704279
FOXF1	-2.09207023000772	3.69999911601614	-3.0840062436467	0.00218679071794621	0.0296816272288868	-1.71801403063649
SMC2	-1.49700447217857	5.65020990619786	-3.0826071915734703	0.00219684923223978	0.0297049599777615	-1.72208091617254
MACF1	-1.32180966878418	4.20855830539712	-3.0825923196274196	0.0021969563826907	0.0297049599777615	-1.7221241378048602
UBA6	1.7394650328238899	6.56170852256178	3.08255553066967	0.00219722146304068	0.0297049599777615	-1.7222310549581599
MCM3AP	-1.31200101421648	7.9681266880951	-3.0824766882680397	0.0021977896557533604	0.0297049599777615	-1.72246018498257
MXRA8	-12.8927289891295	22.570500543856898	-3.08112955415223	0.00220751894507994	0.0297945248483524	-1.72637433484355
SPARC	-103.82523208761299	245.905234757729	-3.07927591876347	0.00222097107366488	0.0299340143444265	-1.73175748364398
MTMR14	-1.67757429357416	9.6886240793214	-3.0756704884627197	0.00224735248000696	0.0302259465903458	-1.7422192009296
LGALS8	1.11845982303028	6.59782971301381	3.0751746644311804	0.0022510029488658602	0.030253857687836002	-1.74365699968498
FBXO32	-3.7212650746755696	9.25976507128691	-3.07448487810994	0.00225609052274578	0.0303010311747241	-1.74565688675429
ZNF205	1.3402045585842501	8.04219213804944	3.07383585647874	0.0022608870877153	0.0303277171497165	-1.7475381956939098
SRF	-2.54035712547444	16.6030181984958	-3.0737887485838105	0.00226123560129095	0.0303277171497165	-1.7476747319116102
NADK	-1.6713102739570098	13.0697988575038	-3.0705810901868795	0.00228508304782646	0.030577399541457002	-1.7569670376841997
HTRA3	-12.4100491310756	21.753309976170996	-3.07042890090112	0.0022862202302161897	0.030577399541457002	-1.7574076873839501
ANKRD65	10.2704843049629	28.2812785019802	3.07008961423005	0.00228875730733021	0.0305900298152986	-1.7583899850908202
TCIM	23.616889799292696	48.999350918622504	3.0697190626472097	0.00229153113097406	0.0306058045212015	-1.7594626825175699
P4HA1	6.737153057413731	26.9327949914895	3.0690519169475197	0.00229653295152382	0.030630008240949	-1.76139366982348
ARRDC4	1.52095551171396	4.733955146447791	3.06878339977911	0.00229854894877792	0.030635621866918	-1.76217075353246
ARHGEF25	-1.55912720635004	4.382054530938319	-3.06832471372662	0.00230199647730431	0.030660294273999	-1.76349803283622
HLTF	-1.8642566470306101	8.567931251285401	-3.06770916476663	0.00230663047385658	0.030680276843508998	-1.76527892268075
PLEKHO2	-2.58897656650131	9.50842309116977	-3.0671840908456702	0.0023105901298957803	0.030710860923722	-1.76679778387455
TRIM44	-1.12186727514561	6.004019105435691	-3.0634381267165	0.0023390207985962102	0.0310457729494394	-1.7776264126547099
RNF126	2.2107944194393103	15.319151306159501	3.06101044969331	0.0023576174486852697	0.0311985432047325	-1.78463748408676
CX3CL1	4.7954390957280495	7.500680224548921	3.05807487581504	0.0023802862071601698	0.0314139653534002	-1.79310828370999
AKIRIN1	-3.96486276090913	20.938730255465	-3.05787687496316	0.00238182237467506	0.0314139653534002	-1.79367935027889
ACTA2	-69.1899118509755	107.0424099238	-3.05574276358572	0.00239843756771958	0.0315509533737139	-1.7998322397315498
COL1A2	-112.702622567246	214.97272756809	-3.05532134111287	0.00240173113180651	0.0315715015439698	-1.8010467659634
CKS1B	-4.171238912877009	17.337235828236402	-3.05512241308416	0.00240328726737915	0.0315715015439698	-1.80162001485344
FKBP8	12.5263341002901	100.401122914657	3.0541177433191495	0.00241116056731272	0.0316216530563324	-1.8045146187541599
CTPS1	-3.78734960461317	12.5520072360199	-3.05389406362754	0.0024129167014236897	0.0316216530563324	-1.8051589500713
EIF1B	-2.7633457434072994	18.5408429926175	-3.0537955278732003	0.0024136906893982802	0.0316216530563324	-1.8054427777351
GLIS2	-1.84020080370377	5.16172225348871	-3.0521549707671	0.0024266106536091803	0.031747605049876	-1.81016704546007
MTIF3	3.46853007960613	24.6509349170141	3.05021860753494	0.00244194193618346	0.0318830297935687	-1.8157400285081597
TWSG1	-6.5227437801363095	20.9623144790821	-3.0499097435242404	0.00244439559972003	0.0318933844349341	-1.81662864845926
COL4A1	-17.896015049713398	48.77330046029039	-3.04827302431361	0.00245743579277915	0.0319983131092314	-1.8213361562226298
HES1	16.494869990090198	68.4792288624145	3.04714212960608	0.00246648323930355	0.0320726317495356	-1.82458741356554
PTDSS1	-3.2326051169071	17.9912161785675	-3.04261922889175	0.00250297430524437	0.0324811652071104	-1.83757900964906
SGCB	-1.60900566929284	6.1735310300185295	-3.0400200083916005	0.0025241686591442603	0.0326545342003328	-1.8450367053487802
MYLK	-3.8301154948481697	5.17153970931621	-3.039938600965	0.00252483511858244	0.0326545342003328	-1.84527018189614
MCM7	-9.57114496261853	46.51890506881411	-3.0363489776774104	0.00255438347655801	0.0329037485249987	-1.85555930369977
ZNF296	1.6795952179883602	5.21010679226477	3.03588709092199	0.00255820851195364	0.0329309334320252	-1.85688239272314
SSU72	-2.73186641297058	22.2401717854711	-3.03553350313837	0.00256114024070508	0.0329440964091775	-1.85789512641054
PLEKHG2	-1.09458824527887	3.73435448483178	-3.0306399165062405	0.00260203277241079	0.0333507176300632	-1.87189962709072
SAP18	4.56677466299942	39.8010641952335	3.03052806976206	0.0026029743688152	0.0333507176300632	-1.8722194593096497
NDST1	-1.84076928509857	8.96952920104602	-3.02707766290741	0.00263217614686252	0.033657506708816	-1.8820805726461598
CTDSPL	-1.8291792432483602	10.076322791573599	-3.02557254666206	0.0026450082936233803	0.03377661521764	-1.8863787772026899
SERF2	12.810542351349302	72.62951402925309	3.0231861938396203	0.00266547127986845	0.033970166822265	-1.8931893803603999
TMEM175	1.21746003083058	6.739930134536491	3.0179746928562	0.00271066580815796	0.0344480177222176	-1.9080450975806102
TMEM63A	1.64884258057144	7.38436334887334	3.01794999729998	0.00271088163309109	0.0344480177222176	-1.9081154357004602
PCOLCE2	-1.26307277111293	1.4174417100053103	-3.01750872887902	0.00271474072274831	0.0344480177222176	-1.9093721681818798
AAR2	-2.06763814151982	17.899916826349603	-3.01747618594824	0.00271502552463427	0.0344480177222176	-1.90946484351623
C9orf78	-1.64008095601239	13.4841407193615	-3.0174195629384704	0.00271552113045077	0.0344480177222176	-1.90962609151535
MFSD10	8.48012007901178	45.0005913647416	3.01696935287398	0.00271946465046426	0.0344752726579647	-1.91090807320676
MYO9B	-1.6847068445614197	13.0521985619709	-3.01643568704014	0.00272414598649297	0.0345118389291451	-1.9124274606594598
ELP1	-1.00796844719669	6.42840632591586	-3.01490126685853	0.00273764718136608	0.0346313601697448	-1.91679464517709
SBSPON	-1.754428142952	2.28913138148848	-3.0147490687247203	0.00273898969581602	0.0346313601697448	-1.9172277079033
CORO1B	4.66233661059693	30.1705109748823	3.01374108579404	0.0027478961967348603	0.034698286886581	-1.9200952843552699
HK2	6.315664852547281	20.0535517830009	3.0120969892669396	0.00276248037819718	0.0347613335385489	-1.92477055763897
LUC7L	1.89411553158019	8.10282984503051	3.0096300775774996	0.00278449663491095	0.0349982124151856	-1.9317810865643001
ADAMTS12	-1.00533213417436	1.79829257603683	-3.00943700190853	0.00278622653248041	0.0349982124151856	-1.93232954260858
CPXM2	-2.18073552672437	3.5306960559351803	-3.00790111823731	0.00280002270325012	0.03510263448996201	-1.93669122127882
CLDN7	14.825245883063099	62.2856777671877	3.00612219240009	0.00281608027436972	0.0352809117740019	-1.9417404501726299
MEX3A	-3.6608378151933803	7.580941497370009	-3.00384663703022	0.00283674374527942	0.035424252517449	-1.94819514036778
MYL9	-77.6602625754804	115.52940235350401	-3.00217814342096	0.00285198291853094	0.0355792122613279	-1.9529249180718002
UBE2D3	2.8324060642932003	22.7537282119737	3.0020537017786904	0.00285312250651296	0.0355792122613279	-1.95327757976459
PSMB9	11.472094435832501	24.923113310975598	3.0005937882456406	0.0028665230267885897	0.0356570215365944	-1.95741386431052
SEPTIN11	-2.4662685753196802	12.4672130173066	-3.000121222159	0.00287087304379745	0.0356880179153229	-1.9587523461719
GLMP	-3.88633734104343	17.209932301966	-2.99919067220298	0.0028794565361307803	0.0357484435894814	-1.9613874200231103
GNG11	-2.26965697078417	6.2174096511212005	-2.9988747870393504	0.00288237563689855	0.0357615674950087	-1.96228174689497
SPTBN2	-2.05302984640325	6.5231057702246105	-2.99734344087855	0.0028965653101466603	0.035868106606497	-1.9666159860016
SRSF8	1.75234419004596	12.3682468694116	2.99218388435552	0.0029448469269459103	0.0363437183297523	-1.9812037747672298
TRIB2	5.331153293650719	12.6690165108155	2.9920268734419397	0.00294632768090307	0.0363437183297523	-1.98164732122893
THEM6	9.89691328404348	33.514406399405395	2.9911598885950696	0.00295451641471846	0.0363979745099954	-1.98409610196573
RIPK4	4.366774151303661	14.1668869364147	2.98836038245983	0.0029811004934757104	0.0366519826665829	-1.99199862730651
THRA	-1.30878608367112	4.1919202904863395	-2.9880062832019103	0.0029844785780948897	0.0366519826665829	-1.9929976858942
ADAM12	-1.67106141606556	3.49049948008677	-2.9879855259285497	0.00298467670991022	0.0366519826665829	-1.9930562471336999
NREP	-1.6109867069224098	4.0655696061606905	-2.98778549003072	0.00298658670515401	0.0366520027215258	-1.99362057642095
MAFG	-1.46474286914726	6.66490315121096	-2.98519745015706	0.00301139912064226	0.0368665533045847	-2.00091854988624
KCTD20	-1.4651344667646202	10.3283837192356	-2.9849679397212703	0.00301360860207196	0.0368665533045847	-2.00156545156894
HEPH	-1.29963498233876	2.14642816616991	-2.98496187416489	0.00301366701490149	0.0368665533045847	-2.00158254739693
HOXB2	2.8680462859531897	6.438994167540799	2.9843654640106703	0.00301941565969792	0.0368748462288479	-2.00326337321521
TGFBR2	-5.1371750176323205	17.9651077086881	-2.9842940351425296	0.0030201048171393198	0.0368748462288479	-2.0034646552873703
RSRP1	2.15901501188611	9.14174277740781	2.9832420428092497	0.00303027130684922	0.0369348346030247	-2.0064285714209
RRAGD	-1.0720606823717298	3.0212366871285403	-2.98296702764961	0.0030329342243754	0.0369348346030247	-2.0072032433623304
EAF1	-1.1613325244036299	6.04273698304173	-2.98285699245278	0.00303400027347366	0.0369348346030247	-2.00751317511736
COA7	-1.05575757576125	7.1883130747668895	-2.98282053254835	0.0030343535820081396	0.0369348346030247	-2.0076158678716998
ANTKMT	1.5366488243385101	6.032897990296919	2.98263425001387	0.00303615930936505	0.0369348346030247	-2.008140531483
TRA2A	3.51333728264575	24.5752616263031	2.9799024067501003	0.0030627536525255	0.0371593472207231	-2.01583116024842
HEXD	1.92585872811899	7.6655428985255805	2.9792798759804398	0.00306884371329772	0.0371862538533729	-2.01758275532799
YARS1	-2.04761820367623	14.5149871063604	-2.9782984521173104	0.00307846725144257	0.0372319875669627	-2.02034344734494
RNASEH1	-1.0861577890040401	6.673835308917281	-2.97789352633581	0.00308244587207498	0.0372319875669627	-2.0214822286626
EDARADD	2.4708256090565497	6.883565873657731	2.97738201029361	0.00308747852940928	0.0372319875669627	-2.02292056481817
NBDY	6.683806785901231	34.7734712400836	2.9773162136640696	0.00308812642893739	0.0372319875669627	-2.02310556178653
TMEM102	1.82613484041701	8.737510772438519	2.9763507080975895	0.00309764808669347	0.0372676513751185	-2.02581977504558
EMC1	-1.11698104730577	7.92484840806099	-2.9762810264913	0.00309833631385207	0.0372676513751185	-2.02601563032251
GMPR2	2.00656287429721	15.4060777087126	2.97586194802952	0.00310247839598021	0.0372676513751185	-2.0271934489978602
YKT6	-5.4715873607063195	35.016255485953	-2.97572334467107	0.00310384943692643	0.0372676513751185	-2.02758295846494
COL8A1	-2.321223934108	5.02580744347752	-2.97488753492598	0.00311212888667375	0.0372744422076849	-2.0299314220865
GTPBP2	3.3090450491938	19.1913310913331	2.9742210421119304	0.0031187455796375103	0.0373200171978306	-2.03180368672764
SLFN5	1.7459303228373	6.233862297923241	2.97323379255319	0.00312857028838536	0.0374142720789099	-2.0345762629068704
PRKDC	-3.75859373208842	16.284064586062	-2.97238763937999	0.00313701339507096	0.0374918974895662	-2.03695188712183
GPATCH4	-1.5688475406652	9.46691284965081	-2.97000389188066	0.0031609111989171603	0.0376837122820626	-2.04364092699026
NADSYN1	2.42088838139717	8.614703772081981	2.9696119399016405	0.00316485654740589	0.0377006627681277	-2.04474029410272
PRRX1	-2.2125105678305697	3.86029213355998	-2.9689586516323705	0.00317144249508456	0.0377389867166011	-2.0465723629446204
VIM	-61.7855301325356	101.510910732971	-2.96656369645428	0.00319569397229188	0.0379765177377395	-2.05328543781954
SND1	-4.28371939740601	34.6693272184069	-2.9657978032720096	0.00320348518661543	0.0380260423325933	-2.05543115012477
FOXC1	2.490145234934	7.64437607151358	2.9641463004704702	0.00322034462248307	0.0382025564048239	-2.06005617037035
SRPX	-5.5352111726109	8.2189496096837	-2.96364363900236	0.00322549215082675	0.038240001388135006	-2.06146338159411
LAMTOR3	1.1697685496771	9.16573891200142	2.9622573915051698	0.00323972710561937	0.0383460895261112	-2.0653430297308
UBD	7.83445241114251	9.774668014702119	2.96218906184811	0.00324043024580227	0.0383460895261112	-2.06553421702454
OAS1	9.93717315209918	28.063986113962198	2.96140116708086	0.00324854809584493	0.0384184819758607	-2.0677384529475002
TWIST1	-2.01974176457508	4.165002039724319	-2.9606932255706204	0.00325585802996596	0.0384563952357152	-2.0697185319836597
AGRN	10.2061568082997	49.7969510132257	2.9603156219376303	0.00325976317003771	0.0384563952357152	-2.07077448672154
LRRC20	-1.23939934869168	4.41701144672794	-2.9583836712266405	0.00327981032332983	0.0386454215152593	-2.07617510419136
OGFR	2.5226967412432098	16.4499335469101	2.95645217738722	0.0032999653761936	0.0388391118372038	-2.08157107943305
CTNNBIP1	-2.80547567108546	17.937455499176302	-2.95642085409298	0.0033002931645484	0.0388391118372038	-2.0816585589592402
RGS2	-10.3393691790227	21.694830536827897	-2.95602147186238	0.00330447518364382	0.0388645133968544	-2.08277387390782
DDX50	-1.8340188684721899	15.3003386649172	-2.9552930869157796	0.00331211474124888	0.0389250062182512	-2.08480759147541
NDUFA1	19.4733177117207	129.199055790734	2.9546814919523703	0.00331854183257196	0.0389345842616843	-2.08651485108321
CDCA8	-3.2486456186355297	14.201074113192	-2.9539480687217496	0.00332626421998073	0.0390013617881257	-2.08856174783458
TMEM64	-3.2795916443227595	8.05835508789555	-2.95372720168984	0.00332859299810058	0.0390048548636484	-2.08917806630894
GARS1	-6.848020785149571	35.732744661531	-2.95267918513012	0.00333966340631178	0.0390794582084608	-2.0921019046123703
DKK3	-3.9869801913595198	9.977838695440429	-2.9526070313278403	0.0033404268183772103	0.0390794582084608	-2.09230316845831
DGKQ	1.17954311686966	6.6457816746298	2.95254684336474	0.00334106374978094	0.0390794582084608	-2.09247105152625
ARG2	1.58241366224547	3.9000681074303998	2.95219851000088	0.0033447521240195103	0.0390987883712226	-2.0934425981179396
ARID5A	-2.09409334279818	7.84017154807472	-2.95128662860525	0.00335442533501298	0.0391078564648203	-2.0959854343449096
ATG13	-1.4085904304145198	10.3956179918785	-2.95063121074328	0.00336139377666355	0.0391078564648203	-2.09781264317
HPS6	1.1690187197128301	9.81204253680058	2.9501657142039903	0.00336635099711485	0.0391078564648203	-2.09911014383482
SREBF1	7.65207088680367	26.212855170728997	2.9495353757435603	0.0033730743225409	0.0391078564648203	-2.10086680462247
WASL	2.98598660398808	19.1676611828031	2.94941194943913	0.00337439225006611	0.0391078564648203	-2.1012107336495
MKI67	-2.54431726402175	10.842160736654801	-2.9493323178494704	0.00337524279398046	0.0391078564648203	-2.10143262083074
PIM3	10.2339977133489	43.681253915979205	2.9491604410725403	0.0033770792754226103	0.0391078564648203	-2.10191152249197
TAPBP	15.1302219834597	73.3636388594518	2.949068990676	0.0033780567834530697	0.0391078564648203	-2.1021663206113703
ADAMTS1	-4.1965463887039	9.00446947833766	-2.94887382199079	0.0033801437952515802	0.0391078564648203	-2.10271007228376
PSD	-1.2964966135625602	1.7059876705355501	-2.9481597368949903	0.0033877898224532	0.0391727220530019	-2.10469926329891
ARMCX1	-1.9054180380919998	4.4107944281617195	-2.94749370392519	0.00339493557847539	0.0392081375346954	-2.10655418320694
SCARF2	-2.1319661805577703	3.7191559666780605	-2.9456511178729397	0.00341477620262914	0.0393320639600354	-2.11168374986395
ULBP2	2.14435723847639	5.7689372006383595	2.94532987575778	0.00341824610566821	0.0393348717885091	-2.11257774064094
POSTN	-23.2750916696542	43.05565815694239	-2.94514490407898	0.0034202455423727	0.0393348717885091	-2.11309245958491
TMPRSS11A	1.7368910398578998	0.810010722172422	2.9416035127553304	0.00345873261802401	0.0397167052766479	-2.12294110085373
GPC2	-1.16803232976497	1.79803728599074	-2.94134069470113	0.00346160458061645	0.0397167052766479	-2.12367154904268
GJA4	-2.17156067643878	6.29881099199612	-2.9413302780392003	0.00346171845429077	0.0397167052766479	-2.1237004987062402
RHOT2	2.8460883377767097	18.960020903371998	2.94045315552076	0.00347131933668484	0.039803080107683	-2.1261378190516402
RPLP1	95.3879653912977	491.63601249208	2.93873273615915	0.00349022153594465	0.0399909131638512	-2.13091644908955
ANKRD13B	-1.4895666944336599	4.37467063561289	-2.93858354532134	0.00349186511380706	0.0399909131638512	-2.1313307150781298
APOBEC3C	7.19794668358347	36.0803217738578	2.9379904403543504	0.0034984061170667898	0.040019418931994	-2.13297742188738
MAP1A	-1.0606985764821701	1.46557116977428	-2.93772285016137	0.00350136087311569	0.0400280576958691	-2.13372025993391
RNF113A	1.4789533929282501	11.7455901659997	2.93661636986436	0.00351360294960716	0.0401149903360413	-2.13679119467508
KDM1B	-1.4358462232143603	5.6642978498885	-2.9364694764469097	0.00351523111192115	0.0401149903360413	-2.13719880079579
MRTO4	-3.36231700416021	24.895325282922396	-2.9359953262257896	0.00352049128238185	0.0401453423536797	-2.1385143601289798
TAMALIN	-1.1897441489893201	3.01282395835024	-2.93585302803372	0.0035220713248958796	0.0401453423536797	-2.13890913573159
INCENP	-1.5728355466518997	7.74774388991763	-2.93491200898104	0.0035325364732115296	0.0401930660571686	-2.14151932967279
PARVA	-1.47747377655971	7.693255778049281	-2.9337824412254196	0.0035451359886573795	0.0403125410291022	-2.1446514631993603
TMEM205	9.7863650449485	46.70473158603371	2.9331696644432794	0.00355198823103152	0.0403648907417809	-2.14635012556883
PODXL2	-8.78568923534249	25.2527756804255	-2.93299504827556	0.0035539430513564204	0.0403648907417809	-2.14683411237189
NPR1	-1.0828750409132	1.65325945090285	-2.9327419339989	0.00355677839884899	0.0403732186337434	-2.14753562492952
HSPB7	-2.48890970523645	2.8488850450689602	-2.93187784972628	0.00356647330920051	0.0404359716764878	-2.14993002028623
OXCT1	-2.6724380109636603	6.70453029903358	-2.9314660377716804	0.00357110227012369	0.0404640650147466	-2.1510709224815803
PTPN13	3.14290488928265	9.836728280440939	2.9312406329580294	0.0035736382493332204	0.0404689246560694	-2.15169532917328
HSBP1L1	1.74078353099101	8.66795635028541	2.93074297108126	0.0035792431564435	0.0405033305112521	-2.15307376816112
SAPCD2	-2.5770617305499504	8.79118458061051	-2.9304207149426604	0.00358287684045865	0.0405033305112521	-2.15396624370164
KCNJ15	2.8038136790183503	7.806965238877809	2.9301891270931204	0.0035854902500916204	0.040507603378388005	-2.15460755911156
DMAC2	-1.2956555268445902	10.4651108342256	-2.92984784544264	0.0035893446988258205	0.0405273099856842	-2.15555255142141
IFI16	10.1863837499816	29.1691926255736	2.92870913347004	0.00360223274544917	0.0406368465950754	-2.15870482855735
APOLD1	-1.51951802454418	3.83697538189932	-2.92860420449969	0.0036034224646841	0.0406368465950754	-2.1589952427288504
FBXW4	1.9244193171995199	12.2885096008036	2.9284304402614505	0.00360539344985986	0.0406368465950754	-2.15947615188577
AP1M2	8.17256337867242	47.3615052388796	2.9281697823569703	0.0036083519043368295	0.0406463382256264	-2.1601974964444097
COL5A3	-2.26452040618566	5.28456368383834	-2.92588352006714	0.0036343960025740003	0.0408678042303491	-2.16652186798941
CDCA7L	-1.38683796362907	2.93245733865331	-2.92559549834831	0.0036376891625073205	0.0408808999737364	-2.1673182730283402
MMS19	-1.35679369508471	11.417017383597699	-2.9237031468836703	0.00365939360926089	0.0410525703701175	-2.1725489254853003
NUDT22	1.19319704407298	8.66598043362741	2.92368544679722	0.0036595971783513295	0.0410525703701175	-2.17259783505973
STMN3	-5.86273025243909	10.2042762177834	-2.92349320896661	0.0036618087758157297	0.0410525703701175	-2.1731290159589602
RAMP1	-7.37103541837297	12.686427886858802	-2.9233972239498995	0.00366291349068109	0.0410525703701175	-2.1733942239316897
DBNDD1	-1.9295421799777701	5.664971716924899	-2.92333304807586	0.0036636522760794205	0.0410525703701175	-2.1735715381461103
DHTKD1	-2.53133308980294	9.74706428856909	-2.9216879837156404	0.00368263656010687	0.0411931961406014	-2.1781154853979
MAD2L1	-1.33303823442134	5.51044270685063	-2.92106520948201	0.0036898468635032	0.041235456816806	-2.17983505566514
CBR3	4.50944838698332	10.4622126177606	2.92062288338794	0.00369497581217699	0.041235456816806	-2.18105616954653
LPIN3	1.71274063007209	7.072762524341919	2.9198005567059906	0.0037045283156181205	0.0412937729714229	-2.1833258677140304
COL3A1	-192.545775732897	352.69207560019	-2.9192358702546	0.0037111010042816	0.0413430428586034	-2.1848841010431
WIPF1	-1.54847728950598	4.432389199398131	-2.91861720729637	0.00371831416936981	0.0413781414529903	-2.18659094999624
NDC80	-2.09156355395635	7.57325245291371	-2.9185961028485696	0.0037185604575581204	0.0413781414529903	-2.1866491696300603
KIFAP3	-1.4967835279751203	6.991159719256	-2.91835895517008	0.0037213289865489795	0.0413849707676084	-2.18730334770637
HERC6	2.18831075395561	5.280801718008389	2.91783274336186	0.0037274788502249102	0.04140972072541	-2.1887547352701398
GNG10	-1.01046259898328	5.9036894632059695	-2.91690607876588	0.00373833137560724	0.0414540371823976	-2.19131003594963
BAP1	-2.08627750970134	16.9019197819236	-2.9163712028223103	0.00374460862904141	0.0414867446880793	-2.19278461647033
APPL1	-1.291308176206	7.436247142177769	-2.91456425118106	0.00376588603336392	0.041639382358542004	-2.19776422539592
NCOA1	-1.22745338123091	6.7530185031164	-2.91384812005969	0.0037743491715301796	0.0417055913104925	-2.1997369276931
MVP	7.57607987253763	42.0561103904361	2.9136902679187	0.00377621697849351	0.0417055913104925	-2.2001716953321497
SST	19.8874494968607	7.69017098183809	2.91120624738024	0.0038057207460832796	0.0418657455963989	-2.20701039651514
CHMP2A	11.2740637040837	65.31313023398779	2.91046141455019	0.00381460833093149	0.0419366729272296	-2.20905989220632
PTPRS	2.6315613259121298	7.93886697933599	2.91005502408866	0.00381946549126485	0.0419660493279363	-2.21017791222024
CNPY4	-1.5467828929691	6.597201274170231	-2.90919206788634	0.00382979821713142	0.0420314883189864	-2.2125514942877205
HDAC7	2.0057554790736	12.600285355325902	2.90743023464602	0.0038509729731745	0.042184532623615	-2.21739536939125
EMP3	-10.980674249858	19.9468471372698	-2.90739167947427	0.00385143754358045	0.042184532623615	-2.21750133921533
ACADVL	13.310627150160999	72.93387249278709	2.9069115504299106	0.00385722713972672	0.0421878726911113	-2.2188208729631
ELN	-4.00592556016991	6.98392437177917	-2.90621578548922	0.0038656310482825897	0.0422557256194169	-2.22073266681969
RPS2	77.4794922608125	439.545931754592	2.90575375099579	0.00387122102817696	0.0422623450349718	-2.2220019840976
PRR13	3.9835431101691903	29.8385264789984	2.9055762101466103	0.0038733709872367	0.0422623450349718	-2.22248967918171
OCIAD1	2.5289344298325602	22.870699673590497	2.90551561304886	0.00387410504659675	0.0422623450349718	-2.2226561295995397
NSUN6	1.11964257668368	4.93316000894787	2.90543857020385	0.00387503850914221	0.0422623450349718	-2.22286774902916
TONSL	-1.1399197743545602	5.929412075092441	-2.9048535879817003	0.0038821329341805298	0.0423156896332981	-2.2244743890270797
VILL	2.50469115218306	5.41473762168664	2.90465271912429	0.0038845717197990297	0.0423182555022462	-2.22502599928864
MAP7	1.9666338385308602	9.26201871426147	2.9044433089337005	0.0038871156946087295	0.0423219637361992	-2.22560102624744
PDZRN3	-1.03385013453381	1.9197438725369298	-2.9035294647418906	0.0038982351240090703	0.0424039781137452	-2.22810991976459
OSGIN2	-1.47720517464535	6.65575972302429	-2.9003898488560402	0.003936658532603879	0.0426752969065648	-2.2367237557454502
PTPRU	4.14311816804327	16.988357706936	2.9002294832660604	0.00393863036375946	0.0426752969065648	-2.23716349478178
GSDMC	2.61551964288814	4.25838505906556	2.90015342866679	0.00393956583439234	0.0426752969065648	-2.23737203623006
XPOT	-3.05802937624356	14.991333528500302	-2.89956250849847	0.00394684104860996	0.0427300051745224	-2.23899215907651
S1PR1	-1.9097191418127502	4.5076078453274695	-2.8984930240972298	0.0039600393371023	0.0428133665799283	-2.24192355609928
PDCD11	-1.18214770257327	8.7475200671382	-2.89821656873162	0.0039634575538432	0.0428133665799283	-2.24268113656171
LOXL2	-3.5589035332789902	9.393283487437671	-2.8974360643440895	0.00397312257642055	0.0428695461813108	-2.2448196074175297
SPOCK1	-2.75036799505821	5.404777483560669	-2.89681985764369	0.00398076826282907	0.0429252849825132	-2.24650753680384
TOB2	2.3341509111362098	14.587672919305598	2.8966596387697296	0.00398275840043937	0.0429252849825132	-2.2469463562452097
SUPT5H	-2.84297498436083	21.5355274316772	-2.89542546646825	0.00399811893215762	0.0429863927295138	-2.25032582142591
ADAMTS2	-2.64502440930863	6.05655007108068	-2.89541230144443	0.00399828307493704	0.0429863927295138	-2.25036186304985
COL1A1	-217.611535481592	420.637512947755	-2.8953051668780603	0.00399961906735609	0.0429863927295138	-2.2506551573931097
RAD21	-6.57092185216532	37.6800559704758	-2.89377427297423	0.00401875415818982	0.0431196605375384	-2.2548450377609504
ARL5A	-1.0709029292326	5.7702704125088005	-2.89292456681835	0.0040294108514557295	0.0432098631005353	-2.2571696707880897
SPINDOC	-2.13107325963701	12.5733873928649	-2.89234957396903	0.00403663679633885	0.0432622906664551	-2.25874237038287
FBXO8	1.2138200749688899	6.41246694481504	2.89191067012514	0.0040421604528925	0.0432622906664551	-2.2599426429786096
NPLOC4	-2.00253778088365	15.6743587077119	-2.89164061624471	0.0040455625344659706	0.0432622906664551	-2.26068107411009
ADAM19	-3.08441380893414	5.577343370600491	-2.8912547495767797	0.00405042812847431	0.0432902184949792	-2.26173606744075
MIB1	-1.1821462832968201	5.745038483119299	-2.89087338370403	0.00405524220817877	0.0433175649890331	-2.26277862284735
BTN3A2	1.82271393232005	7.177633933222901	2.88831309286007	0.00408769663686759	0.0435915056122593	-2.2697743871008
TXNIP	40.9820975851931	136.760340318326	2.88789618949248	0.00409300368021256	0.0436238782919881	-2.27091297651203
RASL11B	-1.8917927468208602	3.4343704964272797	-2.88725265806031	0.0041012079481342	0.0436529082496386	-2.2726701927317796
LRPPRC	-2.22708235621145	15.8511268542991	-2.8871478106399797	0.0041025460476204105	0.0436529082496386	-2.27295645185308
FAM83H	7.0817880612667405	41.23582380089871	2.88659857116795	0.0041095621349161	0.0437033501457357	-2.2744558475135
SETD5	-2.21178942519786	11.7357009939351	-2.88487005675806	0.00413171388645137	0.0439123276182156	-2.2791728220658998
TMEM59	4.4901862731167	30.0941374669908	2.8819622321015297	0.00416922457513752	0.0442397241697445	-2.28710193762536
TET3	-1.03634814482068	4.56128944245076	-2.8813852465375205	0.00417670441369164	0.0442703007557184	-2.2886743637452005
SMG5	-4.08955417330328	28.550887553376498	-2.88066592908341	0.00418604650675136	0.0443375522154385	-2.29063425693114
PNCK	4.31552747334651	5.646438253606219	2.8800537468978797	0.00419401217090776	0.0443802742448785	-2.29230187438572
UBTD2	-1.2587938300642498	9.17342108323165	-2.87936273286353	0.00420302017054035	0.0444025900189034	-2.29418382651052
STAT1	18.6807910465596	54.0863443369774	2.8790324992649197	0.0042073312858198104	0.0444025900189034	-2.29508305332533
HINT1	16.2155871867634	94.3155249676609	2.8790057541991096	0.00420768061201729	0.0444025900189034	-2.29515587587718
VPS41	-1.11333774586174	7.597980228134871	-2.87854914958969	0.0042136485523508295	0.0444351397143971	-2.2963990375706698
QKI	-1.00018563000011	4.22791665590802	-2.8778887280017598	0.00422229406966362	0.0444351397143971	-2.2981967819323303
SMOC2	-4.42463669605896	7.421102899775049	-2.87787782581456	0.00422243692459271	0.0444351397143971	-2.29822645564105
ZMYND8	2.51465507075774	11.7166434860976	2.87753278830028	0.004226960338342371	0.0444351397143971	-2.2991655274501004
ILDR1	1.07561390525142	4.06564085519	2.8768662869597406	0.0042357106118178	0.0445027669642083	-2.3009792065484
FKBP10	-12.7860009017703	31.0529301812271	-2.8766605977838795	0.00423841436457156	0.0445068268375951	-2.30153884538774
ERI3	-3.09954464140387	24.2228567236446	-2.8751887869523998	0.00425780698677189	0.04463724944756599	-2.3055422287731804
MTDH	-3.7640724600781	21.810231811384398	-2.87318752994794	0.004284305200709821	0.0448905431995814	-2.31098258022537
CD93	-3.83447030636237	8.63610008114957	-2.8724507989571397	0.00429409783939591	0.04496861674124201	-2.31298444604358
KCNMB1	-1.0574261910415201	1.53619382519921	-2.87155712933456	0.00430600385261989	0.0450687247920532	-2.315412090199
CCN1	-28.9488332181281	69.6225731149244	-2.87053624538123	0.00431964145413813	0.0451052158600625	-2.31818442582732
PDGFRA	-1.33166897083972	2.7709913644839705	-2.87038609741213	0.00432165053656475	0.0451052158600625	-2.31859209145003
FLNC	-5.4195385033334995	6.17496926780115	-2.86974169159845	0.0043302827877349	0.0451261048406058	-2.32034148100302
LTBP3	-2.1132986887383702	9.57382872081067	-2.86934297931908	0.004335631663360279	0.0451405607934949	-2.32142368996103
GPD2	1.8595550910137701	10.2457745009865	2.8681383976162302	0.004351828126285679	0.0452524152644519	-2.32469236389975
GFPT2	-2.6313582965628703	3.44480863786116	-2.86612842005728	0.0043789763409159	0.0454854621977451	-2.3301435814279503
ZNF784	1.0238327414286998	5.328403951475581	2.86527201460586	0.00439059032098104	0.0455289117494079	-2.33246510883502
MAGEA6	-4.71394653011557	8.88909001115143	-2.86526865873941	0.00439063588600197	0.0455289117494079	-2.33247420454652
TCF7L1	-1.9228532332835302	4.05302769793384	-2.86207088317535	0.00443425044759337	0.0458858912157749	-2.34113679173418
COL6A1	-53.9751803076387	100.158663894666	-2.8611853740382203	0.0044463974201057205	0.0459868114434843	-2.34353394655554
RALBP1	-18.392468358867	49.588374497123496	-2.8607583975449598	0.00445226528010017	0.0460124322681815	-2.34468955742302
NEK2	-1.5736152046410803	7.2527202205040195	-2.86065654039975	0.00445366612446888	0.0460124322681815	-2.34496520914571
GALE	3.6255643599913503	19.6830743796135	2.86011218794161	0.00446115941923429	0.0460403158548166	-2.3464382080443196
TPST1	-2.3930462063617797	8.857286324880679	-2.8578373298252404	0.0044925982831739795	0.0462157700196248	-2.3525909901061497
UNC50	1.40906944928635	13.7287320472081	2.85756805716052	0.0044963329768849	0.0462294278126613	-2.3533189783762403
TMBIM6	19.8328910829553	156.53297697531602	2.8558161317907595	0.00452070043878579	0.0463720438786929	-2.35805376697102
RNF40	-1.5599640087386901	10.461061209281599	-2.85437679813274	0.00454080986873485	0.0464628632599476	-2.36194165785613
USP1	-2.85642428844235	12.9738567360952	-2.85331190985012	0.00455574010683501	0.0465412470701453	-2.36481689827763
LMBRD1	3.32126641893197	20.5747272525375	2.85264100933931	0.00456516935492141	0.0465771449964952	-2.3666278284747597
PPP1R8	-1.72230443176662	17.4443238713519	-2.85201204417094	0.004574025329859129	0.0465927848853006	-2.36832519410169
ARHGAP17	-1.07809476565361	4.80861467146464	-2.85104872816051	0.0045876193263030395	0.0466275517587176	-2.37092416521467
SLC10A3	3.73270631852829	25.770536775862002	2.85098883497466	0.00458846573070792	0.0466275517587176	-2.3710857258090003
DESI1	1.21821393145791	10.0260766513185	2.85016832869548	0.004600075345293561	0.0466734376666325	-2.3732986966745497
RAMP2	-3.1345651952500404	11.487219394207301	-2.84978894725836	0.00460545236149651	0.0466734376666325	-2.37432171236676
SLC37A2	1.94203189603658	6.5759714848552	2.8497863174186002	0.00460548965444666	0.0466734376666325	-2.3743288033690098
ADAMTS4	-1.34791801691278	3.08823109336471	-2.84907710086707	0.00461555686215366	0.0467297760118731	-2.37624087972844
ZNF320	1.2001448029401398	4.83080067428017	2.8477117332042794	0.0046349943689752	0.0469018450213581	-2.37992068211985
KLHDC10	-1.00582736980086	7.1867198981799	-2.8472827001750396	0.00464111747059298	0.046939074323437996	-2.38107662011356
NDRG1	34.6565565164975	76.8904966125651	2.8469265080675297	0.0046462065813519604	0.0469658124218136	-2.38203617700992
EBF4	1.44653126881118	4.2606083377787	2.8466181287547796	0.00465061666064056	0.0469856620643149	-2.38286683665489
CD34	-1.24866320248634	4.37213443908396	-2.84610856794105	0.0046579121399260605	0.0470099109613347	-2.38423921583032
SLC5A6	-4.22556722588643	15.0803636685027	-2.8457615611457996	0.00466288625436053	0.0470353956939329	-2.38517366022785
RCN3	-12.175678883952301	24.462009802864298	-2.84469865271062	0.00467815240481893	0.0471151521169127	-2.38803525580948
RPL9	24.568680069013098	138.058115970086	2.8438519871403303	0.00469034522725276	0.0472131920516858	-2.39031394265617
RPL3	75.4901982741685	426.657982820609	2.84320091970039	0.00469974087752119	0.0472759893955837	-2.3920657613241603
ENTPD3	4.29179872649309	9.71015186440213	2.84290836603011	0.00470396832942625	0.0472759893955837	-2.39285280652286
SEPTIN5	-1.37960232851888	3.5344532110187	-2.84262967348441	0.00470799869916228	0.0472917484393885	-2.3936024895318
SLC7A8	4.82557722491679	11.5733847109463	2.84208896436305	0.0047158272269795	0.0472984374707508	-2.39505679632877
TUBA1B	-16.0476748687745	81.5418818813807	-2.8420734046753697	0.00471605267918816	0.0472984374707508	-2.39509864218815
SLC38A2	12.2584088807681	60.7539676011829	2.84127151606247	0.0047276849173508	0.0473779040870856	-2.39725492545215
PDZD11	3.65825022427877	31.273400592625197	2.8408476901361603	0.00473384348344878	0.0473779040870856	-2.3983943603768303
TACSTD2	96.4129845833127	410.36424089812203	2.83896703023544	0.00476125916831175	0.0475037629021275	-2.4034484560239
SRM	-8.44663978373173	53.48802581889711	-2.83497655479926	0.00481990943372125	0.0479395031507252	-2.41416185815286
ZBTB22	1.30423862223385	10.6751365712612	2.83451384503677	0.0048267524270355295	0.047959684280003	-2.41540318068277
R3HDM4	4.91948389711673	39.995006201340104	2.8331621310029798	0.00484679343535823	0.0480327733330702	-2.4190283439236
DCAF13	-1.50714957553724	7.89777271822723	-2.8323621373859	0.00485869000406885	0.0481010310402817	-2.42117306693194
PGM5	-2.43515258174389	2.71872122580011	-2.83183343382236	0.00486656681245182	0.0481413093579882	-2.42259016300038
ISLR	-19.4203619145738	31.399550915921	-2.83014599728062	0.004891784458997	0.0483041708583529	-2.42711134100098
PALM	-1.7509202137114501	3.2966780112308802	-2.82968777463916	0.00489865275514914	0.0483223034490983	-2.42833861891136
MVB12A	1.5652643405136202	10.928178839307101	2.8277469321380697	0.00492784122663542	0.048533538935860994	-2.43353475085704
MMP2	-37.2381823360249	89.6787555141667	-2.82756730504292	0.00493055061924136	0.048533538935860994	-2.43401548576321
EPHX3	6.380428596369259	12.385295788295	2.82713350669371	0.00493709936400758	0.048533538935860994	-2.4351763369386403
CYBA	14.3852911371909	50.31135331158279	2.82713250305947	0.00493711452431102	0.048533538935860994	-2.4351790224816696
UBQLN1	-2.29109204983135	17.3032009081316	-2.82670209811585	0.00494361986289936	0.048558366130222	-2.4363306237178
MTMR4	-1.6673515224531401	8.26078903731584	-2.8265885002199305	0.00494533813135032	0.048558366130222	-2.43663454079118
CREB3L1	-3.9102301314942793	8.29856456624052	-2.82609570181804	0.004952798421825061	0.0486067687734145	-2.43795282619001
E2F2	-1.1050992823507801	2.54257347688754	-2.8259244215924304	0.00495539376074319	0.0486074017205483	-2.43841096645582
BCAS1	4.465869161775769	10.3047755798135	2.8242384601735497	0.00498100640904349	0.0487341870056491	-2.4429191546401
VASN	-3.29627561562346	9.00514844666512	-2.8224551190212597	0.00500822915208178	0.0489137541636962	-2.44768492491866
ABCG1	1.79826183332661	6.788291870180969	2.8223690291038595	0.00500954672706396	0.0489137541636962	-2.44791491711142
LIMCH1	1.8074137856885002	5.7243439840005195	2.82046424706322	0.005038779331797879	0.0491242618510204	-2.4530018874744903
MTHFD2	-3.6357900998504595	14.954167378674901	-2.81930354859699	0.00505666834316432	0.0492736540836194	-2.45610007040562
GREM1	-2.21273512187594	4.44607823806957	-2.8189186316260497	0.0050626135054950795	0.04928157880716599	-2.4571272362467402
HIP1	-1.02406998615034	4.57683215035262	-2.818488872191	0.00506925876752426	0.0493197582802558	-2.45827390704952
PPT1	-10.6239047604013	48.52788931619921	-2.8183329642812502	0.00507167148825915	0.0493197582802558	-2.4586898542621602
CLIP3	-3.71329147395781	4.8747029442525305	-2.81692637774303	0.00509348598299186	0.0494817864387161	-2.46244149355254
POLD1	-1.7218869195552702	9.776509756258221	-2.81622915646847	0.005104330589870171	0.0495120067217406	-2.4643004522821497
MAFB	-4.6374530095995095	12.178733189377999	-2.8147800094527597	0.0051269377289146	0.0496633485425207	-2.4681628131820097
DUSP2	12.5572847001179	19.902025138779	2.81309158521175	0.00515339221839573	0.0498256703099702	-2.47266050671023
SLC48A1	1.21474830863425	6.8795503663807205	2.8130002385682897	0.00515482697625277	0.0498256703099702	-2.4729037658359503
TNFAIP6	-1.71557753783814	3.5893660486172903	-2.81255200984631	0.00516187244049316	0.0498686730845632	-2.4740973039250096
CCDC80	-4.36231276131151	6.70805905334567	-2.81176014209266	0.005174340731309171	0.0499034216097993	-2.47620543414608
DAB2IP	2.15801889037477	9.910913338519581	2.8114988510185803	0.0051784608595402395	0.0499034216097993	-2.47690092488359
MAPK6	2.50975512451326	11.562100445969698	2.81097466977719	0.00518673530536968	0.0499330517668823	-2.47829597582576
