# Supplementary material for: WITHDRAWN: Analysis of Autophagy-Related Signatures in The Tumor Immune Microenvironment and Identification of Clinical Prognostic Markers in Bladder Carcinoma
Source: Research Square preprint supplement (doi:10.21203/rs.3.rs-1187613/v1), 2021-12-29
Supplement: Supplementary file 5 [file 793b4a05830fd5158190fbd0.xlsx]

## Sheet: GO_BP
Category	Term	Count	%	PValue	Genes	List Total	Pop Hits	Pop Total	Fold Enrichment	Bonferroni	Benjamini	FDR
GOTERM_BP_DIRECT	GO:0030198~extracellular matrix organization	45	3.6378334680679063	7.600271812411783e-13	DDR1, ERO1A, LAMA5, COL18A1, SPARC, COL16A1, OLFML2B, LAMA2, LAMA4, ELN, FBLN5, EMILIN1, JAM3, POSTN, LAMB3, LAMB2, ITGA3, LUM, FOXF1, BGN, HSPG2, DCN, COL1A1, SMOC2, COL3A1, CCDC80, COL1A2, COL4A2, COL5A1, COL4A1, CRISPLD2, COL6A2, COL5A3, COL5A2, COL6A1, MFAP2, ERCC2, PXDN, COL6A3, COL8A1, ITGA7, ITGA5, AGRN, FBN1, DDR2	1128	196	16792	3.4178245766391666	3.012872618057827e-09	3.0127477464400314e-09	2.9937470669090013e-09
GOTERM_BP_DIRECT	GO:0030199~collagen fibril organization	15	1.2126111560226354	1.070157870459426e-07	FOXC1, LUM, COL12A1, LOXL2, GREM1, COL1A1, COL3A1, ADAMTS2, COL1A2, P4HA1, COL5A1, COL5A3, COL5A2, FMOD, DDR2	1128	39	16792	5.725586470267321	0.0004241206378094997	0.00021210528992505825	0.000210767592586984
GOTERM_BP_DIRECT	GO:0007155~cell adhesion	62	5.012126111560226	2.2255995661325755e-07	DDR1, LGALS3BP, COL18A1, SPON2, SRPX, PTPRU, SPON1, NRP2, TINAGL1, COL16A1, PTPRS, TNFAIP6, TGFB1I1, COL12A1, CIB1, CX3CL1, LOXL2, ISLR, EMILIN1, PGM5, RAC1, CD34, EPHB4, POSTN, ENTPD1, ITGA3, ATP1B1, COL6A2, COL6A1, ADAM12, CDH11, LY6D, CERCAM, COL6A3, COL8A1, ITGA7, PRKD2, ITGA5, MFGE8, DDR2, COL15A1, LAMA2, LAMA4, CD99L2, THY1, EFNB1, ADGRG1, S1PR1, SPOCK1, HES1, MYH10, CTNNAL1, LAMB3, LAMB2, …	1128	459	16792	2.010815989122205	0.0008818387175413277	0.00029407588933831765	0.0002922212230332072
GOTERM_BP_DIRECT	GO:0030574~collagen catabolic process	17	1.3742926434923202	3.464535962898443e-06	COL18A1, COL15A1, MMP2, COL12A1, COL1A1, COL3A1, ADAMTS2, COL1A2, COL4A2, COL5A1, COL4A1, COL6A2, COL5A3, COL5A2, COL6A1, COL6A3, COL8A1	1128	64	16792	3.9542331560283683	0.013639570827064018	0.0034333551392323565	0.003411701789464241
GOTERM_BP_DIRECT	GO:0001525~angiogenesis	34	2.7485852869846403	1.4991167873713846e-05	LAMA5, COL18A1, CLIC4, RAMP2, COL15A1, NRP2, TNFAIP2, CIB1, THY1, APOLD1, ADGRG1, SRPX2, S1PR1, SLC12A6, EPHB4, JAM3, SEMA4A, MCAM, MMP2, TIE1, ERAP1, DAB2IP, HSPG2, VEGFA, KLF5, COL4A2, ID1, HOXB3, COL8A1, PRKD2, ITGA5, PLCD3, MFGE8, RAMP1	1128	223	16792	2.26969436758579	0.0576942058845582	0.011884997890280335	0.01181004205091177
GOTERM_BP_DIRECT	GO:0019885~antigen processing and presentation of endogenous peptide antigen via MHC class I	6	0.4850444624090542	2.5292428970059064e-05	ERAP1, TAP2, TAP1, HLA-A, B2M, TAPBP	1128	7	16792	12.759878419452887	0.09539822193424964	0.016709864739552355	0.016604479618843777
GOTERM_BP_DIRECT	GO:0042127~regulation of cell proliferation	29	2.3443815683104283	4.306399162119311e-05	LAMA5, CD40, SRC, CIB1, NDRG1, CHEK1, ABL1, FYN, STAT6, TNFRSF14, JUNB, S100A11, EGLN3, IL4R, TGFB3, GKN1, TNK1, MBD2, STYK1, TNFRSF10B, PTK6, TNFRSF1B, TGFBR2, TNFRSF1A, RNF126, MAFG, TXNIP, PLCD3, TNFRSF21	1128	185	16792	2.3335633505846274	0.15693341516133685	0.022662782758878508	0.0225198540078765
GOTERM_BP_DIRECT	GO:0071230~cellular response to amino acid stimulus	13	1.0509296685529508	4.57372003206428e-05	COL16A1, MMP2, IPO5, COL1A1, COL3A1, ZEB1, COL1A2, COL4A1, RRAGD, PDGFC, COL5A2, COL6A1, LAMTOR3	1128	47	16792	4.117549419043308	0.16582028007901506	0.022662782758878508	0.0225198540078765
GOTERM_BP_DIRECT	GO:0060333~interferon-gamma-mediated signaling pathway	16	1.2934518997574778	5.9727626478491356e-05	SP100, IFNGR1, STAT1, IFNGR2, PRKCD, HLA-A, NMI, MID1, PML, HLA-E, OAS1, IRF1, TRIM26, TRIM31, GBP2, B2M	1128	71	16792	3.3547098191988813	0.2108251572230184	0.026223656044495083	0.026058269717271976
GOTERM_BP_DIRECT	GO:0098609~cell-cell adhesion	37	2.9911075181891675	6.615453088924087e-05	MACF1, LAD1, RPL34, TACSTD2, HDLBP, ASAP1, CBL, NDRG1, CORO1B, CNN3, PDLIM1, SNX1, BAIAP2L1, CALD1, COBLL1, EPS8L1, EPS8L2, RPS2, ERC1, YKT6, SPTAN1, S100A11, SPTBN2, UNC45A, STAT1, ARHGEF16, DAB2IP, CKAP5, SND1, VASN, HCFC1, RAB10, PKM, GIPC1, ALDOA, DBN1, EPHA2	1128	271	16792	2.0324775588181407	0.23067766411070256	0.026223656044495083	0.026058269717271976
GOTERM_BP_DIRECT	GO:0002474~antigen processing and presentation of peptide antigen via MHC class I	10	0.8084074373484237	0.00010562828577284922	BCAP31, SEC13, ERAP1, TAP2, TAP1, HLA-A, MR1, B2M, TAPBP, HLA-E	1128	30	16792	4.962174940898344	0.3421199375602403	0.0380645931639613	0.03782452887811391
GOTERM_BP_DIRECT	GO:0002053~positive regulation of mesenchymal cell proliferation	9	0.7275666936135812	0.00021082856157448102	FBXW4, SMO, PRRX1, STAT1, FOXF1, CTNNB1, TP63, TGFBR2, VEGFA	1128	26	16792	5.1530278232405875	0.5664779104414703	0.0690573620823794	0.06862183381495775
GOTERM_BP_DIRECT	GO:0071260~cellular response to mechanical stimulus	15	1.2126111560226354	0.0002264746990592665	CD40, TNFRSF10B, CYBA, BCL10, AQP1, SLC9A1, TNFRSF1A, COL1A1, CASP8, IRF1, CHEK1, CASP1, BAK1, RAC1, SLC38A2	1128	71	16792	3.1450404554989517	0.5925542079387665	0.0690573620823794	0.06862183381495775
GOTERM_BP_DIRECT	GO:0042060~wound healing	16	1.2934518997574778	0.00024559523200660776	PDGFRB, PDGFRA, MACF1, SCARB1, SPARC, SMAD3, TGFB3, TPM1, DCN, MTOR, CORO1B, TGFBR2, COL3A1, SDC1, TFF1, MAP3K5	1128	80	16792	2.977304964539007	0.6223015177154505	0.0695385356910138	0.06909997277671627
GOTERM_BP_DIRECT	GO:0043123~positive regulation of I-kappaB kinase/NF-kappaB signaling	24	1.9401778496362168	0.00047188851518749033	MAP3K3, NDFIP2, CD40, UBE2I, NDFIP1, NEK6, F2R, TNFRSF10B, BCL10, MTDH, TNFRSF1A, BST2, GPRC5B, CASP8, CASP10, UBD, CASP1, ABL1, FLNA, CTNNB1, FYN, RBCK1, APOL3, TMEM9B	1128	161	16792	2.2191092903396323	0.846031549189232	0.1198201842012756	0.11906450695479935
GOTERM_BP_DIRECT	GO:0030203~glycosaminoglycan metabolic process	9	0.7275666936135812	0.00048363343774480565	FOXC1, BGN, GPC2, SDC1, B3GALT6, AGRN, GPC6, HSPG2, DCN	1128	29	16792	4.619955979457081	0.8530388024258315	0.1198201842012756	0.11906450695479935
GOTERM_BP_DIRECT	GO:0007507~heart development	26	2.1018593371059016	0.0005429486302119144	RAMP2, FOXC1, NRP2, SPARC, PRKDC, SRF, CASP7, PPP3CB, PDLIM3, EDNRA, OXCT1, SH3PXD2B, PSKH1, HEXIM1, KCNJ8, ITGA3, FOXF1, CAD, MBD2, TGFBR2, ADAM19, COL3A1, ID1, APLNR, ID3, FBN1	1128	183	16792	2.1150253846451963	0.8838453587997359	0.12660284530353108	0.1258043914355724
GOTERM_BP_DIRECT	GO:0001568~blood vessel development	10	0.8084074373484237	0.000740082399860138	COL1A1, MAP3K3, COL1A2, COL5A1, FOXF1, LAMA4, GJA4, RAPGEF1, TGFBR2, MIB1	1128	38	16792	3.917506532288168	0.9468572055718132	0.15440455963397826	0.15343076700258335
GOTERM_BP_DIRECT	GO:0042157~lipoprotein metabolic process	10	0.8084074373484237	0.000740082399860138	APOL4, SCARB1, APOL6, SDC1, APOL1, HSPG2, APOL3, ABCG1, APOLD1, APOL2	1128	38	16792	3.917506532288168	0.9468572055718132	0.15440455963397826	0.15343076700258335
GOTERM_BP_DIRECT	GO:0001501~skeletal system development	21	1.6976556184316896	0.0008156095520573688	POSTN, FOXC1, COL12A1, PRELP, AEBP1, ETS2, ADAMTS4, COL1A1, RAI1, COL3A1, RASSF2, COL1A2, COL5A2, CDH11, SH3PXD2B, USP1, WDR5, FGFR3, TP63, EPHA2, FBN1	1128	137	16792	2.281876067712378	0.9606159924820329	0.16165381321777048	0.1606343012776988
GOTERM_BP_DIRECT	GO:0016032~viral process	36	2.9102667744543247	0.000938972560457774	GTF2A2, SP100, NUP188, PSMB10, NUP160, IPO5, AP1G2, RNF216, FYN, PLCG1, BUB1, MAP3K5, NDC1, PDGFRA, UBE2I, CD93, NUP155, KRT7, HLA-A, PSMB8, SND1, PSMB9, TNFRSF1A, DYNC1LI1, KRT19, LMBRD1, PSMA4, NACA, ERCC2, FKBP8, GRB2, VIM, RBCK1, MFGE8, TLN1, EPHA2	1128	299	16792	1.792357503735857	0.9758588105901158	0.17724224903117214	0.17612442455443675
GOTERM_BP_DIRECT	GO:1900026~positive regulation of substrate adhesion-dependent cell spreading	9	0.7275666936135812	0.0009901068572522977	PREX1, ARPC2, MYADM, RAC3, FLNA, CIB1, RAC1, TRIOBP, DNM2	1128	32	16792	4.186835106382978	0.9802919449924009	0.1783992537340049	0.17727413230530908
GOTERM_BP_DIRECT	GO:0001570~vasculogenesis	12	0.9700889248181084	0.0010758442317930546	GJC1, RAMP2, SMO, FOXF1, TIE1, JUNB, QKI, TEAD2, EPHA2, TGFBR2, HDAC7, VEGFA	1128	56	16792	3.189969604863222	0.9859753983271949	0.1854194145577248	0.18425001865360188
GOTERM_BP_DIRECT	GO:0016477~cell migration	24	1.9401778496362168	0.0011922522878688516	PDGFRB, LAMA5, FOXC1, STYK1, ASAP3, PTK6, ADAMTS12, CORO1B, ARHGAP35, SLC9A1, ADGRG1, COL5A1, PALLD, S1PR1, ABL1, SDC1, FYN, HES1, ELMO3, PLCG1, GPC6, TSPAN1, CTHRC1, EPHA2	1128	172	16792	2.077189510143493	0.9911638821417532	0.18780182538265547	0.1866174041832189
GOTERM_BP_DIRECT	GO:0070059~intrinsic apoptotic signaling pathway in response to endoplasmic reticulum stress	9	0.7275666936135812	0.0012310396595118273	ERO1A, ERN2, CASP4, DAB2IP, TNFRSF10B, TMBIM6, BAK1, PML, MAP3K5	1128	33	16792	4.059961315280464	0.9924245863110868	0.18780182538265547	0.1866174041832189
GOTERM_BP_DIRECT	GO:0006027~glycosaminoglycan catabolic process	8	0.6467259498787389	0.0012777560303104789	IDUA, HYAL2, FUCA1, GPC2, SDC1, AGRN, GPC6, HSPG2	1128	26	16792	4.580469176213857	0.9937066615653396	0.18780182538265547	0.1866174041832189
GOTERM_BP_DIRECT	GO:0043547~positive regulation of GTPase activity	58	4.688763136620857	0.001312826220098119	CD40, TRIO, ARHGEF10L, ARHGAP35, CX3CL1, RAPGEFL1, PREX1, FGF7, RGS2, DENND5A, RAC1, FBXO8, SPTAN1, PSD, PDGFRB, DENND2D, PDGFRA, RALBP1, PLEKHG2, FNBP1, SH2D3A, ARHGEF17, DENND2A, ARAP3, RAB3IL1, RASA3, CDC42EP5, RAPGEF1, ARHGEF25, ASAP3, ARHGAP17, ASAP1, THY1, CYTH3, FGD5, ALS2CL, SH3BP1, S1PR1, EPS8L1, EPS8L2, FYN, A2M, SPTBN2, RAP1GAP2, ANKRD27, TRAPPC1, DAB2IP, TBCD, ARHGAP29, MYO9B, RGP1, D…	1128	565	16792	1.528174229586393	0.9945244476980594	0.18780182538265547	0.1866174041832189
GOTERM_BP_DIRECT	GO:0032526~response to retinoic acid	10	0.8084074373484237	0.0013265517433689086	PDGFRB, NCOA1, SREBF1, SP100, RARG, TIE1, SLC10A3, HSD17B2, CTSH, AQP3	1128	41	16792	3.6308597128524482	0.9948147747832417	0.18780182538265547	0.1866174041832189
GOTERM_BP_DIRECT	GO:0022617~extracellular matrix disassembly	14	1.131770412287793	0.0015226095113736154	GSN, LAMB3, ELN, MMP2, HTRA1, HSPG2, DCN, ADAMTS4, CAPNS2, SH3PXD2B, TIMP2, CAPN1, A2M, FBN1	1128	76	16792	2.7422545726017167	0.9976189738338156	0.1993505905927109	0.19809333409300914
GOTERM_BP_DIRECT	GO:0007266~Rho protein signal transduction	11	0.8892481810832661	0.0015537855920694024	CNKSR1, ADGRG1, COL1A2, CDC42EP5, GNA12, ARHGAP29, EPS8L1, TAX1BP3, EPS8L2, MYO9B, CTNNAL1	1128	50	16792	3.275035460992908	0.9978961706445189	0.1993505905927109	0.19809333409300914
GOTERM_BP_DIRECT	GO:0006024~glycosaminoglycan biosynthetic process	10	0.8084074373484237	0.0015893785837480287	PDGFRB, NDST1, GPC2, SDC1, B3GALT6, AGRN, GPC6, HSPG2, HS6ST2, HS3ST1	1128	42	16792	3.544410672070246	0.9981734179591184	0.1993505905927109	0.19809333409300914
GOTERM_BP_DIRECT	GO:0035987~endodermal cell differentiation	8	0.6467259498787389	0.0016262351852227538	COL4A2, LAMB3, MMP2, COL12A1, COL6A1, COL8A1, ITGA7, ITGA5	1128	27	16792	4.4108221696874175	0.9984220735104044	0.1993505905927109	0.19809333409300914
GOTERM_BP_DIRECT	GO:0006464~cellular protein modification process	17	1.3742926434923202	0.0016595785796063216	ERO1A, UBE2I, PARP4, UBA7, RIPK3, UBA6, PRKDC, UBE2D3, UBE2L6, PLOD1, RABGGTA, LOXL2, ABL1, SAE1, SEPHS1, ST3GAL2, BAP1	1128	105	16792	2.4101992570077675	0.9986177385140256	0.1993505905927109	0.19809333409300914
GOTERM_BP_DIRECT	GO:0071456~cellular response to hypoxia	16	1.2934518997574778	0.001773371880755107	ERO1A, PTGIS, ACAA2, SRC, TWIST1, NDRG1, MTOR, VASN, AQP1, SLC9A1, VEGFA, KCNMB1, GNB1, UBQLN1, HYOU1, NFE2L2	1128	96	16792	2.4810874704491725	0.9991202621587784	0.2067542980974484	0.20545034818512845
GOTERM_BP_DIRECT	GO:0033209~tumor necrosis factor-mediated signaling pathway	18	1.4551333872271623	0.0022469237961165135	EDARADD, CD40, STAT1, TNFRSF10B, TNFRSF1B, PSMB8, PSMB10, PSMB9, TXNDC17, TNFRSF1A, PYCARD, PSMA5, AIM2, PSMA4, PSME1, PSME2, TNFRSF14, TNFRSF21	1128	118	16792	2.270825820411107	0.9998658869422742	0.2544801693658817	0.25287522379722704
GOTERM_BP_DIRECT	GO:0035264~multicellular organism growth	14	1.131770412287793	0.002451737651368059	WWTR1, CLIC4, RARG, MTOR, SMO, ETNK2, GPD2, ERCC2, FKBP8, SLITRK6, DUOX2, TNS2, STK40, SPTBN2	1128	80	16792	2.6051418439716314	0.9999405646502919	0.2699635569450829	0.2682609613538551
GOTERM_BP_DIRECT	GO:0016525~negative regulation of angiogenesis	12	0.9700889248181084	0.002541654588083327	SEMA4A, FOXC1, SPARC, COL4A2, NPR1, STAT1, TIE1, SERPINF1, DAB2IP, DCN, PML, EPHA2	1128	62	16792	2.8812628689087165	0.9999584222030218	0.27230050776114345	0.2705831735800061
GOTERM_BP_DIRECT	GO:0048146~positive regulation of fibroblast proliferation	11	0.8892481810832661	0.002838070764558973	PDGFRB, PDGFRA, CDKN1A, PRKDC, PDGFC, S100A6, ABL1, MIF, PML, AQP1, DDR2	1128	54	16792	3.0324402416601	0.9999872005337622	0.294407177056224	0.29255042139870496
GOTERM_BP_DIRECT	GO:0072659~protein localization to plasma membrane	12	0.9700889248181084	0.002896538825729752	RAB10, RAP2A, RAMP2, STXBP1, MAP7, FLNA, DCHS1, RAC1, ATP1B1, RAMP1, RAB11A, CRB3	1128	63	16792	2.835528537656197	0.9999898551152124	0.294407177056224	0.29255042139870496
GOTERM_BP_DIRECT	GO:2000379~positive regulation of reactive oxygen species metabolic process	8	0.6467259498787389	0.0031252405873497834	PDGFRB, CDKN1A, RIPK3, DUOXA1, TSPO, GRB2, TGFBR2, NFE2L2	1128	30	16792	3.9697399527186765	0.9999959136261296	0.3033143061478901	0.3014013753573509
GOTERM_BP_DIRECT	GO:0007179~transforming growth factor beta receptor signaling pathway	15	1.2126111560226354	0.0031934637059569983	SMAD3, TGFB3, SRC, LTBP2, ARRB2, CBL, MTMR4, SMAD6, PML, TGFBR2, SKI, COL3A1, COL1A2, ID1, FERMT2	1128	92	16792	2.427150786308973	0.9999968845785551	0.3033143061478901	0.3014013753573509
GOTERM_BP_DIRECT	GO:0010811~positive regulation of cell-substrate adhesion	9	0.7275666936135812	0.003217875082394318	SMOC2, CCDC80, FOXF1, ITGA3, COL8A1, EMILIN1, RAC1, ITGA5, FBLN2	1128	38	16792	3.5257558790593504	0.9999971728007916	0.3033143061478901	0.3014013753573509
GOTERM_BP_DIRECT	GO:0030512~negative regulation of transforming growth factor beta receptor signaling pathway	12	0.9700889248181084	0.0032902409597273647	SKI, SMAD3, RASL11B, TGFB3, TGFB1I1, HTRA3, HTRA1, MTMR4, SMAD6, VASN, TGFBR2, DNM2	1128	64	16792	2.7912234042553186	0.9999978798396902	0.3033143061478901	0.3014013753573509
GOTERM_BP_DIRECT	GO:0006915~apoptotic process	56	4.527081649151172	0.00370806117947809	CLIC4, HIP1, UBE2D3, CIB1, PYCARD, CASP7, TMEM102, CASP8, MECOM, CASP10, RASSF6, RPS6KA1, CASP4, CASP1, FAM3B, TRIM69, TSPO, CTSH, PIM3, TNS4, TP63, ZNF385A, DFFA, PRKCD, TGFBR2, MFSD10, GREM1, AIM2, ESPL1, IRF1, FKBP8, BIRC5, ELMO3, TNFRSF21, KANK2, NOTCH2, BCL10, BCL2L12, PRDX5, RNF216, RAD21, EMC4, APBB1, RNF130, BUB1, MEF2D, EGLN3, STAT1, NEK6, CARD6, RASSF7, RMDN3, TNFRSF10B, PML, ERCC2, XAF1	1128	567	16792	1.4702740565624726	0.999999597702516	0.33406260262388976	0.33195574968100444
GOTERM_BP_DIRECT	GO:0045668~negative regulation of osteoblast differentiation	9	0.7275666936135812	0.003814597884607764	SKI, TWSG1, SMAD3, ID2, ID1, ID3, TWIST1, TMEM64, HDAC7	1128	39	16792	3.435351882160393	0.9999997367021566	0.3360236892130039	0.3339044681659996
GOTERM_BP_DIRECT	GO:0030168~platelet activation	17	1.3742926434923202	0.004243206304125346	CD40, SRC, SRF, DGKA, F2R, PRKCD, ARRB2, COL1A1, COL3A1, GNA15, COL1A2, DGKQ, GNA12, GNB1, FLNA, FYN, RAC1	1128	115	16792	2.2006167129201355	0.9999999521816592	0.3626897468144854	0.3604023493194395
GOTERM_BP_DIRECT	GO:0030336~negative regulation of cell migration	15	1.2126111560226354	0.004300307290686381	PTPRU, CLIC4, SRF, TIE1, ZMYND8, TPM1, ARAP3, ADARB1, THY1, PODN, CX3CL1, BST2, RAP2A, DPYSL3, PLXNB3	1128	95	16792	2.3505039193729003	0.9999999619047386	0.3626897468144854	0.3604023493194395
GOTERM_BP_DIRECT	GO:2000773~negative regulation of cellular senescence	5	0.40420371867421184	0.00454624138807643	BCL2L12, PRKDC, ABL1, TWIST1, TP63	1128	11	16792	6.7666021921341075	0.9999999856911848	0.3754437679653118	0.3730759339090221
GOTERM_BP_DIRECT	GO:0038063~collagen-activated tyrosine kinase receptor signaling pathway	4	0.32336297493936944	0.005170545515321684	DDR1, COL4A2, COL4A1, DDR2	1128	6	16792	9.924349881796688	0.9999999988098824	0.4158621586537277	0.41323941547352
GOTERM_BP_DIRECT	GO:0010718~positive regulation of epithelial to mesenchymal transition	8	0.6467259498787389	0.005501308818082941	COL1A1, WWTR1, SMAD3, TGFB3, TGFB1I1, TWIST1, CTNNB1, TGFBR2	1128	33	16792	3.608854502471524	0.9999999996814982	0.4158621586537277	0.41323941547352
GOTERM_BP_DIRECT	GO:0010634~positive regulation of epithelial cell migration	8	0.6467259498787389	0.005501308818082941	RAB25, CAPN7, SRC, ITGA3, CTSH, PLCG1, RAB11A, TGFBR2	1128	33	16792	3.608854502471524	0.9999999996814982	0.4158621586537277	0.41323941547352
GOTERM_BP_DIRECT	GO:0009612~response to mechanical stimulus	11	0.8892481810832661	0.005503308971213245	SMPD2, COL3A1, POSTN, SUN1, STAT1, SRC, MBD2, TXNIP, JUNB, DCN, TGFBR2	1128	59	16792	2.7754537805024637	0.9999999996840274	0.4158621586537277	0.41323941547352
GOTERM_BP_DIRECT	GO:0046777~protein autophosphorylation	22	1.7784963621665322	0.005665125269248561	PDGFRB, DDR1, PDGFRA, MAP3K3, RIPK3, SRC, NEK6, TNK1, CAD, TTK, PTK6, THY1, MTOR, CLK1, MKNK2, ABL1, PRKD2, PIM3, NEK2, FGFR3, EPHB4, DDR2	1128	172	16792	1.9040903842982024	0.999999999834228	0.4158621586537277	0.41323941547352
GOTERM_BP_DIRECT	GO:0001666~response to hypoxia	22	1.7784963621665322	0.005665125269248561	POSTN, EGLN3, RAMP2, SMAD3, TGFB3, SRF, MMP2, CYBA, PLOD1, ATP1B1, APOLD1, PML, TXN2, TGFBR2, LOXL2, VEGFA, PDLIM1, EDNRA, PKM, FUNDC1, ERCC2, CASP1	1128	172	16792	1.9040903842982024	0.999999999834228	0.4158621586537277	0.41323941547352
GOTERM_BP_DIRECT	GO:0008360~regulation of cell shape	19	1.5359741309620047	0.00587962706249269	SEMA4A, WIPF1, TPM1, ARAP3, PARVA, ARHGAP35, VEGFA, FGD5, CDC42EP5, PALM, GNA12, PLXNB3, PLXNB2, ITGA7, FYN, PLEKHO1, ALDOA, MYH10, FERMT2	1128	140	16792	2.020314083080041	0.9999999999295156	0.4191640000741282	0.4165204329697252
GOTERM_BP_DIRECT	GO:0000122~negative regulation of transcription from RNA polymerase II promoter	67	5.416329830234438	0.0059215903138625575	FOXA1, RARG, ZNF296, UBE2D3, BHLHE41, ETS2, ARHGAP35, CHCHD3, SOX15, ZNF205, JUNB, LMCD1, TP63, DACT1, SREBF1, TLE1, HCFC1, ETV7, ZEB1, SMO, TXNIP, HOXB3, KANK2, HOMEZ, HDAC5, SP100, NFIX, TWIST1, AEBP1, GLIS2, HDAC7, MTDH, IFI16, DNAJB5, HES1, STAT6, ZBTB7A, SPDEF, IGBP1, HEXIM1, WWTR1, CBX6, UBE2I, SMAD3, PRRX1, STAT1, FOXF1, MBD2, DAB2IP, TBX6, SUPT5H, SORBS3, VEGFA, MAD2L2, SKI, HEYL, KLF5, N…	1128	720	16792	1.3852738376674552	0.9999999999403758	0.4191640000741282	0.4165204329697252
GOTERM_BP_DIRECT	GO:0010976~positive regulation of neuron projection development	14	1.131770412287793	0.006273590782707968	ITGA3, SERPINF1, DAB2IP, PTK6, ARHGAP35, GPRC5B, DPYSL3, ENC1, RAPGEF1, PLXNB3, PLXNB2, FYN, APBB1, NFE2L2	1128	89	16792	2.3417005339070847	0.999999999985354	0.4287674803905928	0.426063346432529
GOTERM_BP_DIRECT	GO:0007517~muscle organ development	14	1.131770412287793	0.006273590782707968	UNC45A, LAMA5, TAGLN, LAMA2, TWIST1, AEBP1, SGCE, CENPF, MRAS, SGCB, ID3, COL6A3, ITGA7, MEF2D	1128	89	16792	2.3417005339070847	0.999999999985354	0.4287674803905928	0.426063346432529
GOTERM_BP_DIRECT	GO:0051491~positive regulation of filopodium assembly	7	0.5658852061438965	0.006489710991493113	TGFB3, SRF, ZMYND8, DPYSL3, PALM, WASL, AGRN	1128	26	16792	4.007910529187125	0.9999999999938158	0.43602058254709664	0.4332707050083284
GOTERM_BP_DIRECT	GO:0043536~positive regulation of blood vessel endothelial cell migration	6	0.4850444624090542	0.0071050370717934234	HSPB1, PRKD2, PLCG1, AMOTL1, NFE2L2, VEGFA	1128	19	16792	4.7010078387458005	0.9999999999994694	0.4627721765305892	0.4598535830862742
GOTERM_BP_DIRECT	GO:0034097~response to cytokine	10	0.8084074373484237	0.007189733824354137	SP100, COL3A1, TMEM102, PPP3CB, SPARC, STAT1, SRF, TIMP2, JUNB, PML	1128	52	16792	2.862793235133661	0.9999999999996216	0.4627721765305892	0.4598535830862742
GOTERM_BP_DIRECT	GO:0001701~in utero embryonic development	23	1.8593371059013744	0.007267993036995763	BTF3, FOXC1, SMAD3, TGFB3, FOXF1, SRF, TIE1, WNT7B, TPM1, TWIST1, TGFBR2, MIB1, VEGFA, EDNRA, SMO, ETNK2, MAFG, GNA12, ERCC2, HSD17B2, CTNNB1, PLCG1, MYH10	1128	187	16792	1.830962946106876	0.9999999999997232	0.4627721765305892	0.4598535830862742
GOTERM_BP_DIRECT	GO:0097190~apoptotic signaling pathway	12	0.9700889248181084	0.007393849963292342	CD40, HIP1, CASP8, PTGIS, RIPK3, CASP10, ANXA6, TNFRSF14, BAK1, TNFRSF1B, TNFRSF21, MAP3K5	1128	71	16792	2.516032364399161	0.9999999999998326	0.4627721765305892	0.4598535830862742
GOTERM_BP_DIRECT	GO:0035023~regulation of Rho protein signal transduction	13	1.0509296685529508	0.0075627336665691595	TRIO, PLEKHG2, ARHGEF25, ARHGEF17, ARHGEF16, MYO9B, ARHGEF10L, PREX1, FGD5, DNMBP, ALS2CL, EPS8L1, EPS8L2	1128	81	16792	2.389195341914018	0.9999999999999148	0.4627721765305892	0.4598535830862742
GOTERM_BP_DIRECT	GO:0042493~response to drug	33	2.6677445432497984	0.0076658037325918185	COL18A1, HDAC5, CDKN1A, MCM7, SRC, SRP14, COMT, SLC9A1, TXN2, AQP1, OXCT1, DPYSL2, GNA12, ABL1, TIMP2, TSPO, RAD54L, FYN, BAK1, JUNB, B2M, SREBF1, PARP4, ITGA3, STAT1, CTPS1, CYBA, TGFBR2, COL1A1, CENPF, SST, TXNIP, CTNNB1	1128	304	16792	1.615971444568869	0.9999999999999436	0.4627721765305892	0.4598535830862742
GOTERM_BP_DIRECT	GO:0048565~digestive tract development	8	0.6467259498787389	0.007705086692991647	COL3A1, CLMP, TGFB3, FOXF1, PDGFC, DCHS1, SLC4A2, TGFBR2	1128	35	16792	3.402634245187437	0.9999999999999516	0.4627721765305892	0.4598535830862742
GOTERM_BP_DIRECT	GO:0042476~odontogenesis	7	0.5658852061438965	0.007879275507301609	COL1A2, TGFB3, ID3, TWIST1, SDC1, AQP3, AQP1	1128	27	16792	3.859469398476491	0.999999999999976	0.4661708673275161	0.4632308391531498
GOTERM_BP_DIRECT	GO:0008283~cell proliferation	38	3.071948261924009	0.008305152810341445	LAMA5, FOXC1, MCM7, PRKDC, SRC, ELN, BHLHE41, TACSTD2, MKI67, CKS1B, KIF15, EDNRA, IFI16, PPP1R8, TSPO, BAK1, RAC1, MYH10, CD34, TSPAN1, BUB1, APPL1, FAM83A, SERPINF1, MIF, SKI, CLK1, BST2, CENPF, TXLNA, ZEB1, ERCC2, GNB1, KIF2C, MXD1, MAPRE2, IL9R, SLC29A2	1128	366	16792	1.5455954733945665	0.9999999999999956	0.48008586975915707	0.4770580829922602
GOTERM_BP_DIRECT	GO:0090050~positive regulation of cell migration involved in sprouting angiogenesis	4	0.32336297493936944	0.008598914417986919	SRPX2, CIB1, HDAC7, VEGFA	1128	7	16792	8.506585612968593	0.9999999999999988	0.48008586975915707	0.4770580829922602
GOTERM_BP_DIRECT	GO:0012501~programmed cell death	4	0.32336297493936944	0.008598914417986919	GSDMC, GSDMB, PKM, RNF130	1128	7	16792	8.506585612968593	0.9999999999999988	0.48008586975915707	0.4770580829922602
GOTERM_BP_DIRECT	GO:0001783~B cell apoptotic process	4	0.32336297493936944	0.008598914417986919	PKN1, BAK1, BCL10, TNFRSF21	1128	7	16792	8.506585612968593	0.9999999999999988	0.48008586975915707	0.4770580829922602
GOTERM_BP_DIRECT	GO:0002479~antigen processing and presentation of exogenous peptide antigen via MHC class I, TAP-dependent	11	0.8892481810832661	0.008792906775179122	PSMA5, PSMA4, PSME1, PSME2, CYBA, HLA-A, B2M, PSMB8, PSMB10, PSMB9, HLA-E	1128	63	16792	2.5992344928515143	0.9999999999999992	0.48409836745569496	0.4810452748254245
GOTERM_BP_DIRECT	GO:0043392~negative regulation of DNA binding	7	0.5658852061438965	0.009470619424147323	SP100, SMO, IFI16, NFIB, ID2, CTNNBIP1, NEK2	1128	28	16792	3.7216312056737593	1.0	0.5142676081824656	0.5110242453659769
GOTERM_BP_DIRECT	GO:0060337~type I interferon signaling pathway	11	0.8892481810832661	0.009811918963424362	BST2, SP100, OAS1, STAT1, MX2, IRF1, HLA-A, XAF1, GBP2, PSMB8, HLA-E	1128	64	16792	2.558621453900709	1.0	0.525600632040732	0.5222857945530887
GOTERM_BP_DIRECT	GO:0045766~positive regulation of angiogenesis	16	1.2934518997574778	0.009951607528460412	RAMP2, PTGIS, ERAP1, HSPB1, TWIST1, CX3CL1, AQP1, TGFBR2, MTDH, VEGFA, GREM1, CTSH, PRKD2, PLCG1, CD34, NFE2L2	1128	115	16792	2.0711686709836568	1.0	0.5259756299042276	0.5226584273947409
GOTERM_BP_DIRECT	GO:0043065~positive regulation of apoptotic process	32	2.5869037995149555	0.01103780672607892	RARG, TRIO, PRKDC, SRC, SLC9A1, PYCARD, RASSF2, PNMA1, UBD, ABL1, TSPO, SAP18, APBB1, BAK1, RAC1, SPDEF, MAP3K5, PHLDA3, NCOA1, PDGFRB, DFFA, PLEKHG2, TGFB3, ARHGEF17, ARHGEF16, DAB2IP, DNM2, CLIP3, LATS2, TXNIP, ID3, CTNNB1	1128	300	16792	1.5878959810874704	1.0	0.575708761344432	0.5720779038687482
GOTERM_BP_DIRECT	GO:0070208~protein heterotrimerization	5	0.40420371867421184	0.011730964102991143	COL1A1, COL1A2, COL6A2, COL6A1, GNB1	1128	14	16792	5.31661600810537	1.0	0.6039161260293103	0.6001073714504169
GOTERM_BP_DIRECT	GO:0030335~positive regulation of cell migration	22	1.7784963621665322	0.01192941825369085	PDGFRB, PDGFRA, COL18A1, SEMA4A, SMAD3, TNFAIP6, FOXF1, MCAM, SEMA4B, F2R, CIB1, SEMA3F, MYLK, VEGFA, FAM83H, COL1A1, FAM110C, PDGFC, S1PR1, MYADM, CTSH, ITGA5	1128	184	16792	1.7799105766265804	1.0	0.6062591533029554	0.6024356218113879
GOTERM_BP_DIRECT	GO:0006869~lipid transport	12	0.9700889248181084	0.012209083430545782	APOL4, APOL6, GM2A, TMEM30B, HDLBP, TSPO, APOBR, ESYT1, APOL1, APOL3, APOLD1, APOL2	1128	76	16792	2.3505039193729003	1.0	0.6126178065656136	0.6087541725686055
GOTERM_BP_DIRECT	GO:0038091~positive regulation of cell proliferation by VEGF-activated platelet derived growth factor receptor signaling pathway	3	0.2425222312045271	0.012899065316742113	PDGFRB, PDGFRA, VEGFA	1128	3	16792	14.886524822695035	1.0	0.6391486864445716	0.6351177285330897
GOTERM_BP_DIRECT	GO:0032731~positive regulation of interleukin-1 beta production	4	0.32336297493936944	0.013077220020083671	AIM2, SMAD3, IFI16, HSPB1	1128	8	16792	7.443262411347518	1.0	0.639976545180391	0.6359403661618467
GOTERM_BP_DIRECT	GO:0051603~proteolysis involved in cellular protein catabolic process	9	0.7275666936135812	0.013741251298821687	TINAGL1, PSMA4, CASP8, CTSH, ADAMTS12, CPVL, PSMB8, PSMB10, PSMB9	1128	48	16792	2.7912234042553186	1.0	0.6590768789667728	0.6549202387109279
GOTERM_BP_DIRECT	GO:0000302~response to reactive oxygen species	8	0.6467259498787389	0.013966311259638979	ERO1A, PRDX5, GPX2, HYAL2, GSTP1, GPX7, CYBA, TXN2	1128	39	16792	3.0536461174759046	1.0	0.6590768789667728	0.6549202387109279
GOTERM_BP_DIRECT	GO:0048704~embryonic skeletal system morphogenesis	8	0.6467259498787389	0.013966311259638979	PDGFRA, ZEB1, HOXB3, HOXB2, HOXB8, HOXB7, HOXB6, HOXB5	1128	39	16792	3.0536461174759046	1.0	0.6590768789667728	0.6549202387109279
GOTERM_BP_DIRECT	GO:0007059~chromosome segregation	11	0.8892481810832661	0.014808663036766215	SGO1, CENPF, UBE2I, INCENP, PPP1R7, NEK6, ERCC2, PHF13, MMS19, NEK2, NDC80	1128	68	16792	2.4081143095536084	1.0	0.6906063562087209	0.6862508670802604
GOTERM_BP_DIRECT	GO:0008285~negative regulation of cell proliferation	39	3.1527890056588523	0.016553002171171415	DDR1, KANK2, NOTCH2, COL18A1, PTPRU, CDKN1A, RARG, TGFB1I1, SRF, CIB1, ADARB1, TOB2, NDRG1, ADGRG1, ADAMTS1, NACC2, TIMP2, BAK1, KIFAP3, S100A11, TNS2, TGFB3, F2R, DAB2IP, P3H1, EMP3, PODN, SMAD6, PML, SKI, ZEB1, SST, FABP6, IRF1, PMP22, CTNNB1, TAX1BP3, TFF1, BAP1	1128	396	16792	1.4660971416290565	1.0	0.7629779140293429	0.7581659947935373
GOTERM_BP_DIRECT	GO:0007160~cell-matrix adhesion	13	1.0509296685529508	0.01691509646708663	ITGA3, SRF, ADAMTS12, FBLN5, SGCE, COL3A1, COL5A3, CTNNB1, ITGA7, RAC1, CD34, FERMT2, JAM3	1128	90	16792	2.150275807722616	1.0	0.7707062344313955	0.7658455745270601
GOTERM_BP_DIRECT	GO:0001503~ossification	12	0.9700889248181084	0.017536919766676994	TWSG1, FOXC1, SUN1, SPARC, RASSF2, THRA, CDH11, COL5A2, TMEM119, TWIST1, PDLIM7, DDR2	1128	80	16792	2.2329787234042557	1.0	0.7861180086756805	0.7811601503969491
GOTERM_BP_DIRECT	GO:0051056~regulation of small GTPase mediated signal transduction	17	1.3742926434923202	0.017649975472284453	RAP1GAP2, RALBP1, TRIO, PLEKHG2, ARHGEF17, ARHGEF16, ARHGAP29, ARAP3, MYO9B, ARHGAP17, ARHGAP35, SYDE1, RHOT2, TRIP10, RAC3, RAC1, A2M	1128	134	16792	1.8885889700434	1.0	0.7861180086756805	0.7811601503969491
GOTERM_BP_DIRECT	GO:0098869~cellular oxidant detoxification	11	0.8892481810832661	0.017922157671506556	GSTK1, DUOX1, PRDX5, GPX2, GSTO1, GSTP1, PXDN, MGST2, GPX7, DUOX2, TXNDC17	1128	70	16792	2.3393110435663633	1.0	0.7893714778872443	0.7843931007562702
GOTERM_BP_DIRECT	GO:0006972~hyperosmotic response	4	0.32336297493936944	0.018648420030791268	SST, PKN1, RAC1, HNMT	1128	9	16792	6.616233254531128	1.0	0.7948638387317912	0.7898508225944817
GOTERM_BP_DIRECT	GO:0043589~skin morphogenesis	4	0.32336297493936944	0.018648420030791268	COL1A1, COL1A2, SRF, TP63	1128	9	16792	6.616233254531128	1.0	0.7948638387317912	0.7898508225944817
GOTERM_BP_DIRECT	GO:0021612~facial nerve structural organization	4	0.32336297493936944	0.018648420030791268	EGR2, NRP2, HOXB2, SEMA3F	1128	9	16792	6.616233254531128	1.0	0.7948638387317912	0.7898508225944817
GOTERM_BP_DIRECT	GO:0060071~Wnt signaling pathway, planar cell polarity pathway	13	1.0509296685529508	0.019843463347204517	FZD7, ARRB2, AP2A2, PSMB8, PSMB10, PSMB9, PSMA5, PSMA4, PSME1, PSME2, RAC1, GPC6, CTHRC1	1128	92	16792	2.103530681467777	1.0	0.8368030713650927	0.831525554517432
GOTERM_BP_DIRECT	GO:0007062~sister chromatid cohesion	14	1.131770412287793	0.020237432622813925	SEC13, CDCA8, CKAP5, NDC80, NUP160, SGO1, CDC20, CENPF, INCENP, RAD21, BIRC5, KIF2C, BUB1, MAD2L1	1128	103	16792	2.02341114094884	1.0	0.8444335043877305	0.8391078642238322
GOTERM_BP_DIRECT	GO:0051496~positive regulation of stress fiber assembly	8	0.6467259498787389	0.020593096281706597	SMAD3, TGFB3, TPM1, ARHGEF10L, EVL, RAC1, SORBS3, MTOR	1128	42	16792	2.835528537656197	1.0	0.8472639818559745	0.8419204905475993
GOTERM_BP_DIRECT	GO:0071526~semaphorin-plexin signaling pathway	7	0.5658852061438965	0.020946485928830853	SEMA4A, SEMA4B, PLXNB3, PLXNB2, FLNA, SEMA3F, RAC1	1128	33	16792	3.1577476896625827	1.0	0.8472639818559745	0.8419204905475993
GOTERM_BP_DIRECT	GO:0071364~cellular response to epidermal growth factor stimulus	7	0.5658852061438965	0.020946485928830853	COL1A1, MCM7, GSTP1, ID1, CAD, DAB2IP, PLCG1	1128	33	16792	3.1577476896625827	1.0	0.8472639818559745	0.8419204905475993
GOTERM_BP_DIRECT	GO:0045944~positive regulation of transcription from RNA polymerase II promoter	83	6.709781729991916	0.02146585135151997	FOXA1, RNF10, RARG, CD40, THRA, ETS2, PPP3CB, SOX15, CREB3L1, HYAL2, RPS6KA1, JUNB, TEAD2, TP63, NCOA1, SREBF1, SOX12, EBF4, DCN, TNFRSF1A, HCFC1, GREM1, ZEB1, PAX8, SMO, ELF4, IRF1, TET3, PRKD2, HOXB5, HDAC5, GTF2A2, FOXC1, NFIX, PRKDC, SRF, FOXK2, TWIST1, WDR61, SLC9A1, GLIS2, BCL2L12, RAI1, IFI16, RAD21, HLTF, LEO1, S1PR1, HES1, STAT6, RPRD1B, APBB1, MEF2D, SPDEF, IGBP1, WWTR1, EGR2, SMAD3, PR…	1128	981	16792	1.2595122938671641	1.0	0.8519654393203318	0.8465922970440936
GOTERM_BP_DIRECT	GO:0048010~vascular endothelial growth factor receptor signaling pathway	11	0.8892481810832661	0.02149256910495287	MAPK11, FOXC1, NRP2, SRC, HSPB1, FYN, PRKD2, CYBA, RAC1, MAPK13, VEGFA	1128	72	16792	2.2743301812450754	1.0	0.8519654393203318	0.8465922970440936
GOTERM_BP_DIRECT	GO:0007010~cytoskeleton organization	19	1.5359741309620047	0.022845331585362796	LAMA5, MACF1, SVIL, HIP1, TPM1, KRT13, ARAP3, THY1, FGD5, TUBA1A, PALLD, DPYSL2, KRT15, PALM, VILL, AGRN, SPTAN1, CAP2, SPTBN2	1128	161	16792	1.7567948548522092	1.0	0.8952020553022048	0.8895562300291081
GOTERM_BP_DIRECT	GO:0046580~negative regulation of Ras protein signal transduction	6	0.4850444624090542	0.0232608001251582	RASA3, MAPKAP1, TNK1, DAB2IP, TIMP2, RAPGEF1	1128	25	16792	3.5727659574468085	1.0	0.8952020553022048	0.8895562300291081
GOTERM_BP_DIRECT	GO:0030878~thyroid gland development	6	0.4850444624090542	0.0232608001251582	SMAD3, PAX8, THRA, SRF, HOXB3, DUOX2	1128	25	16792	3.5727659574468085	1.0	0.8952020553022048	0.8895562300291081
GOTERM_BP_DIRECT	GO:2000778~positive regulation of interleukin-6 secretion	5	0.40420371867421184	0.023757728443966314	PYCARD, HYAL2, F2R, TWIST1, IL17RC	1128	17	16792	4.378389653733834	1.0	0.8969108147798329	0.8912542127693648
GOTERM_BP_DIRECT	GO:0032331~negative regulation of chondrocyte differentiation	5	0.40420371867421184	0.023757728443966314	GREM1, RARG, CHADL, CTNNB1, ADAMTS12	1128	17	16792	4.378389653733834	1.0	0.8969108147798329	0.8912542127693648
GOTERM_BP_DIRECT	GO:0030950~establishment or maintenance of actin cytoskeleton polarity	3	0.2425222312045271	0.02465242758721248	MAPKAP1, ARHGAP35, AQP1	1128	4	16792	11.164893617021274	1.0	0.9219077637331158	0.9160935119436788
GOTERM_BP_DIRECT	GO:0016925~protein sumoylation	15	1.2126111560226354	0.024922518882262452	NDC1, MDC1, EGR2, SP100, UBE2I, NUP188, NUP155, CDCA8, NUP160, PML, HDAC7, INCENP, RAD21, BIRC5, SAE1	1128	117	16792	1.9085288234224405	1.0	0.923297802329798	0.9174747838993628
GOTERM_BP_DIRECT	GO:0031115~negative regulation of microtubule polymerization	4	0.32336297493936944	0.02533166914001159	CLIP3, STMN1, TBCD, EML2	1128	10	16792	5.954609929078014	1.0	0.9297660784352402	0.9239022661343116
GOTERM_BP_DIRECT	GO:0010977~negative regulation of neuron projection development	8	0.6467259498787389	0.026065097203664404	RAP1GAP2, DPYSL3, PMP22, SPOCK1, CIB1, VIM, TBX6, B2M	1128	44	16792	2.7066408768536427	1.0	0.947908672617667	0.9419304393140742
GOTERM_BP_DIRECT	GO:0045930~negative regulation of mitotic cell cycle	6	0.4850444624090542	0.0272539165846183	FOXC1, SMAD3, TIMP2, ABL1, PML, MAD2L1	1128	26	16792	3.435351882160393	1.0	0.970044410435428	0.9639265723272328
GOTERM_BP_DIRECT	GO:0030041~actin filament polymerization	6	0.4850444624090542	0.0272539165846183	PREX1, GSN, COBLL1, ABL1, RAC1, MSRB1	1128	26	16792	3.435351882160393	1.0	0.970044410435428	0.9639265723272328
GOTERM_BP_DIRECT	GO:0007067~mitotic nuclear division	26	2.1018593371059016	0.02740791472471441	DCTN1, WASL, SNX33, TRIOBP, KIF15, CDC20, RAD21, ABL1, NEK2, BUB1, UBE2I, NEK6, KLHL21, CKAP5, NDC80, GEM, MAD2L2, SGO1, DYNC1LI1, CENPF, LATS2, INCENP, BIRC5, ANAPC4, KIF2C, MAPRE2	1128	248	16792	1.560684053992221	1.0	0.970044410435428	0.9639265723272328
GOTERM_BP_DIRECT	GO:0006928~movement of cell or subcellular component	12	0.9700889248181084	0.028530142902058	ARPC2, CALD1, ARPC3, TPM1, PALM, CERCAM, HSPB1, WASL, MST1R, VIM, RAC1, TLN1	1128	86	16792	2.077189510143493	1.0	0.9789402479292216	0.972766305901414
GOTERM_BP_DIRECT	GO:0048013~ephrin receptor signaling pathway	12	0.9700889248181084	0.028530142902058	EPHB6, EFNB1, ARPC2, SRC, ARPC3, MMP2, FYN, WASL, RAC1, AP2A2, EPHB4, EPHA2	1128	86	16792	2.077189510143493	1.0	0.9789402479292216	0.972766305901414
GOTERM_BP_DIRECT	GO:0035904~aorta development	5	0.40420371867421184	0.0289637603533156	NDST1, SMAD6, MYH10, LTBP1, DNM2	1128	18	16792	4.1351457840819545	1.0	0.9789402479292216	0.972766305901414
GOTERM_BP_DIRECT	GO:0071901~negative regulation of protein serine/threonine kinase activity	5	0.40420371867421184	0.0289637603533156	PYCARD, DAB2IP, ABL1, HSPB1, CIB1	1128	18	16792	4.1351457840819545	1.0	0.9789402479292216	0.972766305901414
GOTERM_BP_DIRECT	GO:0036120~cellular response to platelet-derived growth factor stimulus	5	0.40420371867421184	0.0289637603533156	PDGFRB, SRC, FYN, CBL, CORO1B	1128	18	16792	4.1351457840819545	1.0	0.9789402479292216	0.972766305901414
GOTERM_BP_DIRECT	GO:0030514~negative regulation of BMP signaling pathway	8	0.6467259498787389	0.02914100637125332	SKI, GREM1, TWSG1, HTRA3, HTRA1, RBPMS2, ABL1, SMAD6	1128	45	16792	2.646493301812451	1.0	0.9789402479292216	0.972766305901414
GOTERM_BP_DIRECT	GO:0035329~hippo signaling	6	0.4850444624090542	0.031657244102085695	WWTR1, LATS2, DCHS1, AMOTL1, TEAD1, TEAD2	1128	27	16792	3.3081166272655635	1.0	1.0	0.9939439818319457
GOTERM_BP_DIRECT	GO:0033077~T cell differentiation in thymus	6	0.4850444624090542	0.031657244102085695	MAFB, RIPK3, PRKDC, FZD7, CTNNB1, B2M	1128	27	16792	3.3081166272655635	1.0	1.0	0.9939439818319457
GOTERM_BP_DIRECT	GO:0051591~response to cAMP	8	0.6467259498787389	0.03245277513306609	COL1A1, SREBF1, DUOX1, SPARC, STAT1, SDC1, JUNB, DUOX2	1128	46	16792	2.5889608387295717	1.0	1.0	0.9939439818319457
GOTERM_BP_DIRECT	GO:0035556~intracellular signal transduction	38	3.071948261924009	0.03254768025688	NPR1, PKN3, SRC, DGKA, HSPB1, SMPD2, PREX1, RASSF1, PRKAR2A, AKT3, STMN1, RPS6KA1, MKNK2, RAC3, PLEK2, FYN, PLCG1, RAC1, SH2B3, TNS2, MAP4K4, MAP3K3, CDC42BPG, PRKCD, ARHGAP29, MYO9B, SDCBP2, MAPK13, MAPK11, LATS2, DNMBP, TOLLIP, DGKQ, FKBP8, PRKD2, PLCH2, PLCD3, CAPS	1128	403	16792	1.4036921669042466	1.0	1.0	0.9939439818319457
GOTERM_BP_DIRECT	GO:0009615~response to virus	14	1.131770412287793	0.03273259025250182	IFNGR1, SRC, IFNGR2, MX2, HSPB1, MST1R, BST2, ACTA2, OAS1, HYAL2, STMN1, DHX58, TPT1, DUOX2	1128	110	16792	1.8946486137975505	1.0	1.0	0.9939439818319457
GOTERM_BP_DIRECT	GO:0097202~activation of cysteine-type endopeptidase activity	4	0.32336297493936944	0.0331262045457163	PYCARD, CASP8, IFI16, BAK1	1128	11	16792	5.4132817537072855	1.0	1.0	0.9939439818319457
GOTERM_BP_DIRECT	GO:0090190~positive regulation of branching involved in ureteric bud morphogenesis	5	0.40420371867421184	0.03479275322781307	GREM1, SMO, PAX8, HOXB7, VEGFA	1128	19	16792	3.917506532288168	1.0	1.0	0.9939439818319457
GOTERM_BP_DIRECT	GO:0051898~negative regulation of protein kinase B signaling	7	0.5658852061438965	0.03507674362267305	LMBRD1, HYAL2, RAPGEF1, CIB1, ARRB2, EPHA2, PHLDA3	1128	37	16792	2.8163695610504123	1.0	1.0	0.9939439818319457
GOTERM_BP_DIRECT	GO:0031532~actin cytoskeleton reorganization	8	0.6467259498787389	0.036006588189206636	RAP2A, FGF7, CDC42BPG, S1PR1, FLNA, PARVA, PARVB, S1PR2	1128	47	16792	2.5338765655651123	1.0	1.0	0.9939439818319457
GOTERM_BP_DIRECT	GO:0031100~organ regeneration	8	0.6467259498787389	0.036006588189206636	PTPRU, CDKN1A, PKM, GSTP1, CAD, BAK1, MKI67, TGFBR2	1128	47	16792	2.5338765655651123	1.0	1.0	0.9939439818319457
GOTERM_BP_DIRECT	GO:0001569~patterning of blood vessels	6	0.4850444624090542	0.03648042338022755	EDNRA, COL4A1, SRF, CTNNB1, TGFBR2, VEGFA	1128	28	16792	3.189969604863222	1.0	1.0	0.9939439818319457
GOTERM_BP_DIRECT	GO:0018146~keratan sulfate biosynthetic process	6	0.4850444624090542	0.03648042338022755	B4GAT1, LUM, B3GNT3, PRELP, FMOD, ST3GAL2	1128	28	16792	3.189969604863222	1.0	1.0	0.9939439818319457
GOTERM_BP_DIRECT	GO:0050690~regulation of defense response to virus by virus	6	0.4850444624090542	0.03648042338022755	FYN, HLA-A, RAC1, AP2A2, B2M, AP1M2	1128	28	16792	3.189969604863222	1.0	1.0	0.9939439818319457
GOTERM_BP_DIRECT	GO:0050920~regulation of chemotaxis	3	0.2425222312045271	0.039273419824522884	PDGFRA, USP14, ADGRA2	1128	5	16792	8.931914893617021	1.0	1.0	0.9939439818319457
GOTERM_BP_DIRECT	GO:0030311~poly-N-acetyllactosamine biosynthetic process	3	0.2425222312045271	0.039273419824522884	B3GNT8, B4GAT1, B3GNT3	1128	5	16792	8.931914893617021	1.0	1.0	0.9939439818319457
GOTERM_BP_DIRECT	GO:0002829~negative regulation of type 2 immune response	3	0.2425222312045271	0.039273419824522884	NDFIP1, STAT6, IL27RA	1128	5	16792	8.931914893617021	1.0	1.0	0.9939439818319457
GOTERM_BP_DIRECT	GO:1900747~negative regulation of vascular endothelial growth factor signaling pathway	3	0.2425222312045271	0.039273419824522884	ADGRA2, DAB2IP, DCN	1128	5	16792	8.931914893617021	1.0	1.0	0.9939439818319457
GOTERM_BP_DIRECT	GO:0038033~positive regulation of endothelial cell chemotaxis by VEGF-activated vascular endothelial growth factor receptor signaling pathway	3	0.2425222312045271	0.039273419824522884	HSPB1, PRKD2, VEGFA	1128	5	16792	8.931914893617021	1.0	1.0	0.9939439818319457
GOTERM_BP_DIRECT	GO:0032611~interleukin-1 beta production	3	0.2425222312045271	0.039273419824522884	PYCARD, CASP1, MR1	1128	5	16792	8.931914893617021	1.0	1.0	0.9939439818319457
GOTERM_BP_DIRECT	GO:0055114~oxidation-reduction process	52	4.203718674211803	0.03931056052401581	ERO1A, MOXD1, VKORC1L1, ALDH1L1, KDM1B, PLOD1, LOXL2, TXNDC17, TXN2, HEPH, SH3PXD2B, QSOX2, GSTK1, GPX2, PTGIS, GSTO1, P3H1, GPX7, CYBA, PDIA5, CYP27A1, SELENON, MTHFD2, GPD2, PXDN, IDO1, H6PD, MAOA, GMPR2, NDUFA4L2, HSD17B8, DUOX1, PRDX5, ALOX5, HSD17B2, DUOX2, CBR3, VAT1, EGLN3, CYBRD1, CYP4B1, PYCR1, PYCR2, OSGIN2, DHRS1, CYP4F11, CP, DHRS3, P4HA1, MSRB3, DEGS2, MSRB1	1128	592	16792	1.3076001533448345	1.0	1.0	0.9939439818319457
GOTERM_BP_DIRECT	GO:0050821~protein stabilization	16	1.2934518997574778	0.039361864320573835	CDKN1A, CRTAP, HIP1, SMAD3, STXBP1, PRKCD, P3H1, ATP1B1, PML, HCFC1, RASSF1, RASSF2, SMO, FLNA, GAPDH, TSPAN1	1128	136	16792	1.7513558614935334	1.0	1.0	0.9939439818319457
GOTERM_BP_DIRECT	GO:0034446~substrate adhesion-dependent cell spreading	7	0.5658852061438965	0.039376593891252455	LAMA5, SRC, FZD7, ABL1, PARVA, RAC1, FERMT2	1128	38	16792	2.7422545726017167	1.0	1.0	0.9939439818319457
GOTERM_BP_DIRECT	GO:0018107~peptidyl-threonine phosphorylation	7	0.5658852061438965	0.039376593891252455	CLK1, CAD, CHEK1, PRKCD, TTK, MTOR, TGFBR2	1128	38	16792	2.7422545726017167	1.0	1.0	0.9939439818319457
GOTERM_BP_DIRECT	GO:0018105~peptidyl-serine phosphorylation	15	1.2126111560226354	0.04073154583893874	PKN3, PRKDC, SRC, NEK6, PRKCD, TTK, MTOR, MAPK13, TGFBR2, CLK1, LATS2, AKT3, MKNK2, PRKD2, PKN1	1128	125	16792	1.7863829787234042	1.0	1.0	0.9939439818319457
GOTERM_BP_DIRECT	GO:0017015~regulation of transforming growth factor beta receptor signaling pathway	5	0.40420371867421184	0.041251239455118	ZEB1, SMAD3, ITGA3, NREP, DKK3	1128	20	16792	3.7216312056737593	1.0	1.0	0.9939439818319457
GOTERM_BP_DIRECT	GO:0007094~mitotic spindle assembly checkpoint	5	0.40420371867421184	0.041251239455118	MAD2L2, CENPF, TTK, BUB1, MAD2L1	1128	20	16792	3.7216312056737593	1.0	1.0	0.9939439818319457
GOTERM_BP_DIRECT	GO:0048008~platelet-derived growth factor receptor signaling pathway	6	0.4850444624090542	0.04173085279103223	PDGFRB, PDGFRA, SRC, PDGFC, RAPGEF1, TXNIP	1128	29	16792	3.0799706529713866	1.0	1.0	0.9939439818319457
GOTERM_BP_DIRECT	GO:0042113~B cell activation	6	0.4850444624090542	0.04173085279103223	IGBP1, BST2, HDAC5, CD40, TXLNA, CASP8	1128	29	16792	3.0799706529713866	1.0	1.0	0.9939439818319457
GOTERM_BP_DIRECT	GO:0055003~cardiac myofibril assembly	4	0.32336297493936944	0.04201475872838591	PDGFRB, PDGFRA, SRF, MYH10	1128	12	16792	4.962174940898344	1.0	1.0	0.9939439818319457
GOTERM_BP_DIRECT	GO:0010447~response to acidic pH	4	0.32336297493936944	0.04201475872838591	SRC, SST, SERPINF1, SLC9A1	1128	12	16792	4.962174940898344	1.0	1.0	0.9939439818319457
GOTERM_BP_DIRECT	GO:0034498~early endosome to Golgi transport	4	0.32336297493936944	0.04201475872838591	SNX1, EHD3, SURF4, SNX8	1128	12	16792	4.962174940898344	1.0	1.0	0.9939439818319457
GOTERM_BP_DIRECT	GO:0034329~cell junction assembly	4	0.32336297493936944	0.04201475872838591	FLNA, FLNC, FERMT2, LIMS2	1128	12	16792	4.962174940898344	1.0	1.0	0.9939439818319457
GOTERM_BP_DIRECT	GO:0051310~metaphase plate congression	4	0.32336297493936944	0.04201475872838591	CENPF, KIF2C, NDC80, GEM	1128	12	16792	4.962174940898344	1.0	1.0	0.9939439818319457
GOTERM_BP_DIRECT	GO:0008154~actin polymerization or depolymerization	4	0.32336297493936944	0.04201475872838591	WIPF1, EVL, WASL, CAP2	1128	12	16792	4.962174940898344	1.0	1.0	0.9939439818319457
GOTERM_BP_DIRECT	GO:1902287~semaphorin-plexin signaling pathway involved in axon guidance	4	0.32336297493936944	0.04201475872838591	PLXNB3, PLXNA1, PLXNB2, SEMA3F	1128	12	16792	4.962174940898344	1.0	1.0	0.9939439818319457
GOTERM_BP_DIRECT	GO:0060444~branching involved in mammary gland duct morphogenesis	4	0.32336297493936944	0.04201475872838591	DDR1, SRC, PML, EPHA2	1128	12	16792	4.962174940898344	1.0	1.0	0.9939439818319457
GOTERM_BP_DIRECT	GO:0043206~extracellular fibril organization	4	0.32336297493936944	0.04201475872838591	MFAP4, COL3A1, COL5A1, LTBP2	1128	12	16792	4.962174940898344	1.0	1.0	0.9939439818319457
GOTERM_BP_DIRECT	GO:0032570~response to progesterone	7	0.5658852061438965	0.043996645277420525	NCOA1, CATSPER1, SREBF1, RAMP2, TGFB3, TSPO, TXNIP	1128	39	16792	2.6719403527914167	1.0	1.0	0.9939439818319457
GOTERM_BP_DIRECT	GO:0043433~negative regulation of sequence-specific DNA binding transcription factor activity	9	0.7275666936135812	0.04624052724012498	MAD2L2, SP100, ID2, ID1, CTNNBIP1, ID3, TWIST1, FLNA, GLIS2	1128	60	16792	2.2329787234042557	1.0	1.0	0.9939439818319457
GOTERM_BP_DIRECT	GO:0045669~positive regulation of osteoblast differentiation	9	0.7275666936135812	0.04624052724012498	WNT7B, CTNNBIP1, TMEM119, CTNNB1, FAM20C, TP63, PDLIM7, CTHRC1, DDR2	1128	60	16792	2.2329787234042557	1.0	1.0	0.9939439818319457
GOTERM_BP_DIRECT	GO:0090090~negative regulation of canonical Wnt signaling pathway	18	1.4551333872271623	0.046757329142091526	WWTR1, DAB2IP, TMEM64, PSMB8, PSMB10, NKD2, PSMB9, DKK3, PSMA5, GREM1, MAD2L2, PSMA4, LATS2, RAPGEF1, PSME1, PSME2, CTHRC1, DACT1	1128	163	16792	1.6439107166166296	1.0	1.0	0.9939439818319457
GOTERM_BP_DIRECT	GO:0051436~negative regulation of ubiquitin-protein ligase activity involved in mitotic cell cycle	10	0.8084074373484237	0.04723416056205757	PSMA5, CDC20, PSMA4, PSME1, ANAPC4, PSME2, PSMB8, PSMB10, PSMB9, MAD2L1	1128	71	16792	2.096693636999301	1.0	1.0	0.9939439818319457
GOTERM_BP_DIRECT	GO:0090004~positive regulation of establishment of protein localization to plasma membrane	6	0.4850444624090542	0.04741369482636485	CLIP3, ITGA3, ARHGEF16, CIB1, NKD2, EPHA2	1128	30	16792	2.977304964539007	1.0	1.0	0.9939439818319457
GOTERM_BP_DIRECT	GO:0000165~MAPK cascade	26	2.1018593371059016	0.04797601995534325	PSMB10, NDST1, FGF7, FYN, MAPK6, MEF2D, SPTAN1, SPTBN2, MAP3K5, PDGFRB, PDGFRA, MAP3K3, DAB2IP, PSMB8, PSMB9, MAPK13, PSMA5, ITPKB, MAPK11, PSMA4, RASA3, PSME1, PSME2, GRB2, LAMTOR3, FGFR3	1128	262	16792	1.4772887228628662	1.0	1.0	0.9939439818319457
GOTERM_BP_DIRECT	GO:0043066~negative regulation of apoptotic process	41	3.3144704931285367	0.048295235476214726	NOTCH2, CDKN1A, RARG, PRKDC, SRC, GSTP1, HSPB1, TWIST1, CIB1, CBL, SLC9A1, AQP1, MTDH, PRDX5, RPS6KA1, FLNA, CTSH, PIM3, KIFAP3, TP63, MAP4K4, PDGFRB, SMAD3, MIF, SMAD6, VEGFA, GREM1, SMO, DDAH2, ID1, CLDN7, FKBP8, PPT1, BIRC5, NAA35, ERCC5, TMBIM6, TPT1, STK40, LIMS2, MAD2L1	1128	455	16792	1.341423115891201	1.0	1.0	0.9939439818319457
GOTERM_BP_DIRECT	GO:0031954~positive regulation of protein autophosphorylation	5	0.40420371867421184	0.04834070585861559	RAP2A, RASSF2, SRC, PDGFC, VEGFA	1128	21	16792	3.544410672070246	1.0	1.0	0.9939439818319457
GOTERM_BP_DIRECT	GO:0043124~negative regulation of I-kappaB kinase/NF-kappaB signaling	7	0.5658852061438965	0.04894151044191259	PYCARD, TLE1, CASP8, STAT1, GSTP1, DAB2IP, ABL1	1128	40	16792	2.6051418439716314	1.0	1.0	0.9939439818319457
GOTERM_BP_DIRECT	GO:0007346~regulation of mitotic cell cycle	7	0.5658852061438965	0.04894151044191259	CDKN1A, NEK6, BIRC5, PIM3, SAE1, RNF40, CKS1B	1128	40	16792	2.6051418439716314	1.0	1.0	0.9939439818319457
GOTERM_BP_DIRECT	GO:0043010~camera-type eye development	7	0.5658852061438965	0.04894151044191259	SKI, TWSG1, FOXC1, GPD2, FKBP8, ARHGAP35, FBN1	1128	40	16792	2.6051418439716314	1.0	1.0	0.9939439818319457
GOTERM_BP_DIRECT	GO:0038083~peptidyl-tyrosine autophosphorylation	7	0.5658852061438965	0.04894151044191259	DDR1, SRC, TNK1, STYK1, ABL1, FYN, PTK6	1128	40	16792	2.6051418439716314	1.0	1.0	0.9939439818319457
GOTERM_BP_DIRECT	GO:0042981~regulation of apoptotic process	22	1.7784963621665322	0.049502959049512164	HIP1, TGFB3, STAT1, CARD6, TNFRSF10B, BCL10, TNFRSF1B, RABGGTA, NDRG1, TNFRSF1A, CASP8, PAX8, CASP10, CASP4, RASSF6, CASP1, BIRC5, FYN, TNFRSF14, TNFRSF21, TPT1, TP63	1128	213	16792	1.5375753337994869	1.0	1.0	0.9939439818319457

## Sheet: GO_CC
Category	Term	Count	%	PValue	Genes	List Total	Pop Hits	Pop Total	Fold Enrichment	Bonferroni	Benjamini	FDR
GOTERM_CC_DIRECT	GO:0031012~extracellular matrix	65	5.254648342764753	6.672698200734827e-18	LGALS3BP, COL18A1, SPON1, TINAGL1, CPXM2, TGFB1I1, COL12A1, HSPB1, RPL9, LOXL2, ADAMTS4, TIMP2, EMILIN1, RAC1, LMCD1, SBSPON, POSTN, CD93, SERPINF1, MMP2, BGN, HSPG2, DCN, PKM, COL4A2, COL4A1, COL6A2, COL6A1, PXDN, COL6A3, COL8A1, MFGE8, GAPDH, LAMA5, COL15A1, LAMA2, PRKDC, LAMA4, HTRA1, PRELP, LTBP2, AEBP1, LTBP3, ADAMTS12, FBLN2, LTBP1, FBLN5, GANAB, CHADL, FLNA, TGFB3, LAMB2, LUM, SSC5D, COL1A…	1191	296	18224	3.360110740463385	4.370617321481313e-15	4.370617321481313e-15	4.190454470061472e-15
GOTERM_CC_DIRECT	GO:0005829~cytosol	326	26.354082457558608	6.217031939188293e-16	EPHB6, RPL4, TRIO, RPL3, WIPF1, RPL34, UBE2L6, PPP2R2A, NADSYN1, RPL9, MYLK, TXNDC17, SMC2, CDC20, PREX1, BAIAP2L1, RUSC2, CAPNS2, DPYSL2, RPS6KA1, CHEK1, DPYSL3, STMN1, TRIM26, LGALS8, KIFAP3, EPHB4, TP63, HERC6, PRKCD, ATG13, RNF126, MTHFD2, MAP1B, RRAGD, PSME1, PADI3, PSME2, TXNIP, RBCK1, ANKRA2, TLN1, MYL9, IDO1, UNC119B, PRKDC, STXBP1, MAPKAP1, CDCA8, BCL10, THY1, MTMR4, PRDX5, RHOT2, SNX1, …	1191	3315	18224	1.5047557536222522	4.363176486776865e-13	2.0360779600841657e-13	1.952148028905124e-13
GOTERM_CC_DIRECT	GO:0005737~cytoplasm	453	36.62085691188359	4.4039280992737556e-13	RPL4, RPL3, RPL34, DQX1, STMN3, ADARB1, RPL9, CAPN15, SMC2, MYLK, FAM110A, PREX1, CAPNS2, FAM110C, SOX15, DPYSL2, AKT3, DPYSL3, STMN1, PRKCD, AFAP1, WDR72, SND1, EML2, HCFC1, DYNC1LI1, RNF126, MAP1B, MAP1A, PSME1, TXNIP, PSME2, HOXB2, PRKD2, HOXB7, PRR11, MAPKAP1, WDR61, C9ORF78, BCL10, MTDH, PRDX5, PRKAR2A, PDGFC, PLEK2, PLCG1, S100A11, HEXIM1, BTF3, GSDMC, NDFIP2, FUCA1, TRIP4, BTBD10, EHD3, TO…	1191	5222	18224	1.3273739179425932	2.8847868538406374e-10	9.615243016747699e-11	9.218889487813062e-11
GOTERM_CC_DIRECT	GO:0070062~extracellular exosome	275	22.231204527081648	6.448585185788576e-13	RPL4, SPON2, IL1RN, RPL3, RPL34, COL12A1, MRGPRF, SOGA1, HS6ST2, MYLK, TXNDC17, SMC2, AQP1, ISLR, BAIAP2L1, RUSC2, DPYSL2, STMN1, LGALS8, KIFAP3, B2M, EPHB4, ARSA, GSTK1, ST6GAL1, ENTPD1, SERPINF1, PRKCD, SYTL1, P3H1, KRT7, HLA-A, MIF, HSPG2, SND1, HLA-E, TWSG1, CCNY, CRISPLD2, PSME1, MXRA8, PSME2, SPARCL1, COL8A1, TLN1, TMEM63A, CFH, STXBP1, THY1, PRDX5, GNG10, RHOT2, C7, PRKAR2A, PDGFC, MAP4, T…	1191	2811	18224	1.4969379321551026	4.223554839200006e-10	1.0559558241728796e-10	1.0124278741688068e-10
GOTERM_CC_DIRECT	GO:0005925~focal adhesion	66	5.335489086499597	2.557304964411884e-12	RPL4, MDC1, RPL3, TGFB1I1, RPLP1, HSPB1, SLC4A2, RPL9, TRIOBP, AKAP12, ANXA6, PGM5, CAPN1, RAC1, SCARF2, TNS4, B2M, TNS2, PDGFRB, ITGA3, AFAP1, CYBA, HSPG2, DNM2, ENAH, PALLD, EVL, ITGA5, TLN1, CD46, EPHA2, DDR2, ASAP3, CD99L2, THY1, CORO1B, SLC9A1, CNN3, PDLIM1, PNMA1, PRKAR2A, GNA12, TSPAN4, FLNA, FLNC, RPS2, PDLIM7, SVIL, ZNF185, GSN, MCAM, PARVA, PARVB, SORBS3, RAB10, EHD3, ARPC2, ARPC3, CTNN…	1191	391	18224	2.5828496331179505	1.6750234532736386e-09	3.350069503379567e-10	3.211975035301326e-10
GOTERM_CC_DIRECT	GO:0005578~proteinaceous extracellular matrix	47	3.7995149555375916	1.4507876120219866e-09	LGALS3BP, COL18A1, SPON2, COL15A1, SPON1, SPARC, COL16A1, OLFML2B, ELN, LTBP2, PRELP, ADAMTS12, LTBP1, FBLN2, FBLN5, ADAMTS4, ADAMTS2, CRTAC1, CHADL, ADAMTS1, TIMP2, GPC2, SPOCK1, EMILIN1, GPC6, CTHRC1, SBSPON, POSTN, CRTAP, LUM, MMP2, WNT7B, BGN, P3H1, PODN, VEGFA, SMOC2, COL1A2, COL5A1, CRISPLD2, COL6A2, COL5A2, PXDN, COL6A3, SPARCL1, FMOD, FBN1	1191	268	18224	2.683459277917716	9.502654279014422e-07	1.583776476457335e-07	1.5184910339163455e-07
GOTERM_CC_DIRECT	GO:0005788~endoplasmic reticulum lumen	35	2.8294260307194827	9.069516008686076e-08	ERO1A, FKBP10, COL18A1, COL15A1, SPON1, COL16A1, H6PD, COL12A1, GANAB, PDGFC, B2M, ARSA, CRTAP, WNT7B, RNASET2, ERAP1, GPX7, P3H1, PDIA5, RCN3, COL1A1, COL3A1, COL1A2, COL4A2, COL5A1, P4HA1, COL4A1, COL6A2, COL5A3, COL5A2, COL6A1, CERCAM, COL6A3, COL8A1, HYOU1	1191	192	18224	2.7893226980128745	5.940356806399816e-05	8.486475693841973e-06	8.136651504935509e-06
GOTERM_CC_DIRECT	GO:0005856~cytoskeleton	51	4.12287793047696	8.443709842404205e-07	HIP1, TGFB1I1, HSPB1, SGCE, AKAP12, HINT1, BAIAP2L1, CASP8, SGCB, DPYSL2, ENC1, TNS4, NINL, FNBP1, TPM1, AFAP1, ARAP3, WIPI1, ENAH, CDC42EP5, FRMD8, DGKQ, PICK1, EVL, ANKRA2, TRIB2, MACF1, PLEKHH3, EPB41, MVP, PDLIM1, FAM83H, FGD5, CALD1, PLEK2, FLNC, CTNNAL1, MPZL2, SPAG4, PARVA, PARVB, PTPN13, SSH3, SORBS3, LRPPRC, DEF6, DNMBP, KLHL5, TRIP10, VIM, FERMT2	1191	371	18224	2.103430716899658	0.000552910316898525	6.913287433468442e-05	6.628312226287299e-05
GOTERM_CC_DIRECT	GO:0030027~lamellipodium	27	2.1827000808407435	1.4446229397907505e-05	CIB1, WASL, CORO1B, SLC9A1, MYLK, FGD5, SNX1, DPYSL3, RAC3, APBB1, PLCG1, RAC1, MYH10, ARAP3, PARVA, PARVB, PTPN13, SLC39A14, DNM2, ACTA2, ENAH, PALLD, ARPC3, CTNNB1, EVL, AMOTL1, EPHA2	1191	160	18224	2.5821158690176316	0.009417721453042873	0.0010513644728477123	0.00100802578465399
GOTERM_CC_DIRECT	GO:0016020~membrane	191	15.440582053354891	2.3200821222668828e-05	ERO1A, RPL4, RASL11B, NUP188, DGKA, CIB1, SLC4A2, COMT, MKI67, RPL9, RAPGEFL1, IPO5, LOXL2, LAPTM4B, VSIG2, DPYSL2, CREB3L1, DUOXA1, STMN1, PALM, DUOXA2, CAPN1, LGALS8, KPNA2, B2M, PDGFRB, PDGFRA, GSTK1, SLC15A1, RALBP1, ENTPD1, IL1R1, CSGALNACT2, PRKCD, TAP2, P3H1, TAP1, CYBA, HLA-A, ATP1B1, RNF40, GEM, SND1, HLA-E, HCFC1, SLC5A6, TPST1, ACLY, DYNC1LI1, TXLNA, ILVBL, ORAI3, LY6D, FKBP8, PSME2, A…	1191	2200	18224	1.3284421036562093	0.01508182683491188	0.0015196537900848085	0.0014570115727836025
GOTERM_CC_DIRECT	GO:0005913~cell-cell adherens junction	42	3.395311236863379	3.431664353797501e-05	MACF1, LAD1, SRC, RPL34, HDLBP, ASAP1, CBL, NDRG1, CORO1B, CNN3, PDLIM1, SNX1, BAIAP2L1, CALD1, COBLL1, FLNA, EPS8L1, EPS8L2, PGM5, RPS2, ERC1, YKT6, SPTAN1, S100A11, SPTBN2, UNC45A, STAT1, ARHGEF16, DAB2IP, PARVA, CKAP5, SND1, VASN, HCFC1, RAB10, PKM, GIPC1, CTNNB1, ALDOA, TLN1, DBN1, EPHA2	1191	323	18224	1.9896592867559328	0.02222704397340192	0.001931119979689175	0.001851516560679087
GOTERM_CC_DIRECT	GO:0015629~actin cytoskeleton	32	2.5869037995149555	3.5379297337816947e-05	CLIC4, TMEM63B, WIPF1, HSPB7, WASL, TRIOBP, CORO1B, ARHGAP35, CNN3, PDLIM3, BAIAP2L1, CALD1, CFL2, ABL1, FLNA, VILL, MYH10, PDLIM7, NDC1, SVIL, GSN, ZNF185, DENND2A, MYO9B, PARVA, ACTA2, ARPC2, PALLD, ARPC3, ALDOA, DBN1, MSRB1	1191	218	18224	2.246081082122032	0.022907398244959017	0.001931119979689175	0.001851516560679087
GOTERM_CC_DIRECT	GO:0005604~basement membrane	17	1.3742926434923202	4.26175345371014e-05	LAMA5, COL18A1, LAD1, SPARC, LAMA2, LAMB2, LAMA4, SERPINF1, HSPG2, LOXL2, SMOC2, EFEMP2, CCDC80, COL5A1, COL4A1, ADAMTS1, FBN1	1191	79	18224	3.2927122192817437	0.02752905443538312	0.0021472680862924167	0.0020587547453307445
GOTERM_CC_DIRECT	GO:0043202~lysosomal lumen	17	1.3742926434923202	0.00010742274897037792	PDGFRB, ARSA, IDUA, LUM, FUCA1, RNASET2, BGN, PRELP, HSPG2, DCN, GM2A, PPT1, SDC1, GPC2, AGRN, FMOD, GPC6	1191	85	18224	3.0602854743912684	0.06794707560815992	0.00502585004111411	0.004818677596671237
GOTERM_CC_DIRECT	GO:0001726~ruffle	17	1.3742926434923202	0.0002154771244800344	PSD, WIPF1, MTMR14, ASAP3, ARAP3, PTK6, CYTH3, FGD5, PALLD, S100A6, MYADM, ABL1, PLCG1, ITGA5, TLN1, S100A11, PDLIM7	1191	90	18224	2.8902696147028637	0.1316433179196227	0.009409167768961502	0.00902130894489744
GOTERM_CC_DIRECT	GO:0000922~spindle pole	19	1.5359741309620047	0.00023470595267662193	DCTN1, ODF2, NEK6, RMDN3, CKAP5, RAB11A, SGO1, FAM110A, CDC20, DYNC1LI1, CENPF, RASSF1, LATS2, FAM110C, POC1A, CTNNB1, NEK2, AUNIP, MAD2L1	1191	109	18224	2.667221285019912	0.14251401387000973	0.009608274937699208	0.00921220864255741
GOTERM_CC_DIRECT	GO:0009986~cell surface	57	4.607922392886015	0.0004458351182643083	EPHB6, SCARB1, SRPX, CD40, CLIC4, SPARC, CX3CL1, TMEM102, ADGRA2, HYAL2, TIMP2, PDGFRB, CD93, ITGA3, IL1R1, F2R, BGN, HLA-A, MIF, IL17RC, HLA-E, TNFRSF1A, GREM1, GPRC5B, LY6D, MXRA8, ITGA7, ITGA5, TLN1, CD46, EPHA2, NOTCH2, USP14, RAMP2, MST1R, CLCN3, SLC9A1, SRPX2, CLMP, PDGFC, SLITRK6, PROM2, TGFB3, GOT2, TNFRSF10B, ABCA7, VASN, VEGFA, BST2, TSPAN14, PLXNB3, PLXNB2, SDC1, ULBP2, RAMP1, FGFR3, F…	1191	542	18224	1.6091907014788032	0.253296518659526	0.017177764850771878	0.016469673780587387
GOTERM_CC_DIRECT	GO:0005886~plasma membrane	316	25.545675020210187	0.0006801822618006897	EPHB6, IL1RN, SPARC, MRGPRF, SPATA20, SLC4A2, AQP3, IL27RA, AQP1, PREX1, EDNRA, RASSF1, GPR176, BAIAP2L1, CAPNS2, ADGRA2, AKT3, SLC12A6, SEPHS1, B2M, EPHB4, TNS2, MFSD2A, ARRDC4, ENTPD1, ENTPD3, FNBP1, IL1R1, PRKCD, SYTL1, HLA-A, HSPG2, HLA-E, SLC5A6, DYNC1LI1, FNDC4, CCNY, MAP1B, KCNQ1, CLDN7, PRKD2, TLN1, EPHA2, MACF1, TMEM63B, GYPC, EPB41, STXBP1, MAPKAP1, MGST2, CD99L2, BCL10, TAPBPL, MST1R, …	1191	4121	18224	1.173319837306043	0.35960555195666044	0.024243241265718446	0.02324390154942166
GOTERM_CC_DIRECT	GO:0000776~kinetochore	15	1.2126111560226354	0.0007032390596162602	SEC13, DCTN1, TTK, CKAP5, NDC80, NUP160, SGO1, DYNC1LI1, CENPF, RASSF2, INCENP, NEK2, KIF2C, BUB1, MAD2L1	1191	81	18224	2.8335976614733966	0.36921084946040816	0.024243241265718446	0.02324390154942166
GOTERM_CC_DIRECT	GO:0032587~ruffle membrane	15	1.2126111560226354	0.0007980038939759531	MACF1, PLA2G4F, SRC, TPM1, ABCA7, CIB1, DNM2, FGD5, EPS8L1, PLEKHO1, EPS8L2, RAC1, ITGA5, TLN1, EPHA2	1191	82	18224	2.799041592431038	0.40720178546218144	0.02613462752771246	0.02505732227084493
GOTERM_CC_DIRECT	GO:0042383~sarcolemma	15	1.2126111560226354	0.0011493140436482302	LAMA2, KCNJ8, BGN, CIB1, ATP1B1, AQP1, SGCE, KRT19, SGCB, COL6A2, COL6A1, COL6A3, PGM5, FLNC, SLC38A2	1191	85	18224	2.7002518891687664	0.5291584401558536	0.035847652313790036	0.03436996282909946
GOTERM_CC_DIRECT	GO:1903561~extracellular vesicle	11	0.8892481810832661	0.0012652513372993597	EFEMP2, PKM, COL6A2, COL12A1, GNB1, COL6A3, PRELP, MFGE8, ATP1B1, SPTAN1, FBLN2	1191	50	18224	3.366314021830395	0.5636298162384159	0.0376699829968673	0.03611717453745445
GOTERM_CC_DIRECT	GO:0030426~growth cone	18	1.4551333872271623	0.0013945513936411244	ITGA3, STMN3, CIB1, THY1, CBL, DNM2, PREX1, PALLD, CRTAC1, ARPC3, DPYSL2, DPYSL3, TIMP2, ABL1, RAC3, APBB1, MYH10, DBN1	1191	116	18224	2.3743594197863285	0.5991101865835307	0.03971439838412767	0.03807731631333157
GOTERM_CC_DIRECT	GO:0048471~perinuclear region of cytoplasm	61	4.931285367825383	0.0015451800860873154	CDKN1A, CLIC4, MTMR14, CIB1, CDC20, PREX1, HEPH, HYAL2, ANXA6, RAC3, CD34, UNC45A, ITGA3, SERPINF1, PRKCD, TNFRSF1B, DNM2, VAMP8, SELENOM, INF2, S100A6, PICK1, GAPDH, SRC, PKN3, MVP, ATP2C2, BCL10, CBL, NDRG1, CORO1B, SLC9A1, MTDH, FAM168B, PRDX5, ABL1, UBQLN1, MAP7, STX6, FLNA, APBB1, GBP2, TSPAN1, GBP4, GBP3, RAP1GAP2, NDFIP2, NDFIP1, STAT1, MYO9B, LRPPRC, DEF6, RAB11A, CENPF, EHD3, MLPH, TOLLI…	1191	621	18224	1.5030387595641497	0.6368268988642924	0.04217053984946632	0.04043221225261809
GOTERM_CC_DIRECT	GO:0000139~Golgi membrane	58	4.688763136620857	0.002044791860882736	SLC2A1, HS6ST2, NDST1, AP1G2, HYAL2, ERC1, RAC1, B2M, SREBF1, ST6GAL1, SEC13, IFNGR2, CSGALNACT2, WIPI1, HLA-A, HLA-E, TNFRSF1A, TAPBP, DNM2, TPST1, B3GNT8, UNC50, B3GNT3, ABCG1, ST6GALNAC6, CHST3, NOTCH2, UNC93B1, TAPBPL, ATP2C2, CLCN3, CYTH3, PDGFC, STX6, ST3GAL5, GBP2, YKT6, GBP4, AP1M2, ST3GAL2, GBP3, B3GALNT1, NDFIP2, TRAPPC1, NDFIP1, SURF4, B3GALT4, B3GALT6, ABCA7, NSG1, MTOR, ARCN1, RAB10,…	1191	591	18224	1.5016629231361551	0.7383401425837104	0.05357354675512767	0.051365171545374316
GOTERM_CC_DIRECT	GO:0005581~collagen trimer	15	1.2126111560226354	0.002493630173146761	COLEC12, COL18A1, COL15A1, COL12A1, COL1A1, COL3A1, COL1A2, P4HA1, COL5A1, COL6A2, COL5A2, COL6A1, COL6A3, EMILIN1, CTHRC1	1191	92	18224	2.4947979410798378	0.8051192825362062	0.06282029859273572	0.060230759566775614
GOTERM_CC_DIRECT	GO:0043234~protein complex	43	3.476151980598221	0.0028359536310897824	HDAC5, CDKN1A, EPB41, STXBP1, CDCA8, BCL10, LTBP1, CDC20, TMEM102, SNX1, RASSF2, DPYSL2, BLOC1S2, UBQLN1, EPS8L1, NEK2, EPS8L2, APBB1, MAPK6, TP63, SREBF1, PDGFRA, GCH1, CAD, MBD2, GOT2, WIPI2, SMAD6, CKAP5, RNF40, RAB11A, DNM2, SKI, RGP1, ACTA2, INCENP, ID2, COL6A2, COL6A1, CTNNB1, SDC1, PKN1, CRB3	1191	412	18224	1.5969936334808799	0.8443567237877467	0.06879813438384473	0.06596218075275494
GOTERM_CC_DIRECT	GO:0000775~chromosome, centromeric region	11	0.8892481810832661	0.0035161187933488345	SGO1, CENPF, INCENP, DSCC1, RAD21, CBX1, CDCA8, BIRC5, KIF2C, MKI67, NDC80	1191	57	18224	2.9529070366933285	0.9004520894992591	0.08225206463012452	0.07886152150796671
GOTERM_CC_DIRECT	GO:0097169~AIM2 inflammasome complex	4	0.32336297493936944	0.004782755846465598	PYCARD, AIM2, CASP4, CASP1	1191	6	18224	10.200951581304228	0.9567267463668934	0.10802431308396436	0.1035714024682895
GOTERM_CC_DIRECT	GO:0005819~spindle	17	1.3742926434923202	0.005400690055400604	DCTN1, CBX1, HSPB1, TTK, MID1, EML2, KIF15, MAD2L2, CDC20, MZT2A, CENPF, INCENP, ERCC2, SPIN1, BIRC5, MMS19, MYH10	1191	121	18224	2.1497873167211385	0.971190176605292	0.11791506620957985	0.11305444515971932
GOTERM_CC_DIRECT	GO:0031410~cytoplasmic vesicle	27	2.1827000808407435	0.005928588961485591	USP14, WIPF1, MAPKAP1, WASL, SNX33, ARRB2, ATP2C2, CLCN3, AP2A2, NKD2, PRDX5, RAB25, RUSC2, ADAMTS1, HYAL2, PALM, UBQLN1, PROM2, PDGFRB, GCH1, FNBP1, ENTPD4, RAB11A, MIB1, GIPC1, ITGA5, AMOTL1	1191	235	18224	1.7580363363524305	0.9796522002603192	0.12526534741203427	0.12010173767138553
GOTERM_CC_DIRECT	GO:0005615~extracellular space	112	9.054163298302344	0.0061200680649401385	SPON2, SPON1, IL1RN, SPARC, COL12A1, SOGA1, TSKU, LOXL2, CFL2, DPYSL3, CHEK1, FAM3B, LGALS8, B2M, ARSA, POSTN, IL4R, SERPINF1, MIF, HSPG2, DKK3, TWSG1, MTHFD2, SPARCL1, CFH, HTRA1, TACSTD2, LTBP2, AEBP1, MTMR4, FBLN5, PRDX5, PDGFC, S100A11, SPTBN2, CRTAP, TGFB3, MCAM, SSC5D, CP, VASN, COL1A1, COL1A2, PPT1, ULBP2, ITM2B, FBN1, DDR1, LGALS3BP, COL18A1, CD40, TINAGL1, TNFAIP6, CPXM2, TNFAIP2, HSPB1,…	1191	1347	18224	1.2722790390936227	0.9820642876520991	0.12527014320424346	0.12010633577445022
GOTERM_CC_DIRECT	GO:0005794~Golgi apparatus	76	6.143896523848019	0.0068443984538918475	HIP1, USP32, TRRAP, STMN3, CIB1, AP2A2, IPO5, SGCE, CAPN8, ARV1, FGF7, MECOM, AP1G2, AKT3, TRIM69, KIFAP3, B2M, GAL3ST4, PSKH1, ST6GAL1, MMD, F2R, BTN3A3, CYBA, HLA-A, SLC39A14, DNM2, ADAM19, RNF144A, TPST1, SELENOM, SMO, ELF4, TMBIM1, FAM20C, PICK1, PRKD2, ITGA5, EAPP, CD46, ABCG1, ST6GALNAC6, HDAC5, MACF1, PKN3, MAPKAP1, GLT8D2, CLCN3, GANAB, FGD5, SNX1, SEC14L1, STX6, ST3GAL5, YKT6, JAM3, NDFI…	1191	863	18224	1.3475185171131885	0.9888742534705632	0.13585093900906545	0.1302509766376994
GOTERM_CC_DIRECT	GO:0001725~stress fiber	10	0.8084074373484237	0.0077693438684777036	TPM1, PGM5, CYBA, MST1R, MYH10, MYL9, FERMT2, CORO1B, PDLIM7, MYLK	1191	54	18224	2.833597661473396	0.9939566211639478	0.14967412452508516	0.14350435145305873
GOTERM_CC_DIRECT	GO:0016023~cytoplasmic, membrane-bounded vesicle	18	1.4551333872271623	0.008559161970377767	PDGFRB, ARRDC4, USP14, CD93, WIPF1, FNBP1, MAPKAP1, WASL, SNX33, AP2A2, NKD2, RAB25, GIPC1, HYAL2, PALM, PKN1, RAC1, KCNK1	1191	138	18224	1.9958383528638703	0.996412792679332	0.16017860258849825	0.15357582049706392
GOTERM_CC_DIRECT	GO:0005589~collagen type VI trimer	3	0.2425222312045271	0.012226096902744538	COL6A1, COL6A3, DCN	1191	3	18224	15.301427371956338	0.9996832665657871	0.21073930187625453	0.2020523382874624
GOTERM_CC_DIRECT	GO:0005588~collagen type V trimer	3	0.2425222312045271	0.012226096902744538	COL5A1, COL5A3, COL5A2	1191	3	18224	15.301427371956338	0.9996832665657871	0.21073930187625453	0.2020523382874624
GOTERM_CC_DIRECT	GO:0042825~TAP complex	3	0.2425222312045271	0.012226096902744538	TAP2, TAP1, TAPBP	1191	3	18224	15.301427371956338	0.9996832665657871	0.21073930187625453	0.2020523382874624
GOTERM_CC_DIRECT	GO:0005605~basal lamina	5	0.40420371867421184	0.013812193810741323	LAMA5, LAMA2, LAMB2, LAMA4, AGRN	1191	15	18224	5.100475790652114	0.9998894505536828	0.22802111426923685	0.21862177062760416
GOTERM_CC_DIRECT	GO:0016323~basolateral plasma membrane	21	1.6976556184316896	0.013924953543159502	ITGA3, SLC2A1, ARRB2, SLC4A2, ATP1B1, AQP3, NKD2, AQP1, SLC9A1, SLC7A8, HEPH, PDZD11, KCNQ1, PALM, CLDN7, MAP7, CTNNB1, SLC12A6, CD46, SLC29A2, PROM2	1191	180	18224	1.7851665267282395	0.999897427838166	0.22802111426923685	0.21862177062760416
GOTERM_CC_DIRECT	GO:0043231~intracellular membrane-bounded organelle	51	4.12287793047696	0.014602754591578013	ERO1A, ANKRD13B, SCARB1, CD40, HIP1, CROT, IPO5, PREX1, CASP7, MECOM, PALM, CHEK1, TRIM69, TSPO, SPTAN1, GSTK1, SUN1, SEC13, ENTPD4, GTPBP2, GPRC5B, PSMA4, COL4A2, SMO, COL8A1, GAPDH, ABCG1, FOXK2, MGST2, HSD17B4, CYP3A5, HSPA13, APOL4, PRDX5, SNX1, ALDH1B1, TRA2A, MVB12A, SNX8, MEF2D, AP1M2, NDFIP2, STN1, NEK6, EAF1, ABCA7, ARCN1, KLF5, P4HA1, TRIP10, ITM2B	1191	558	18224	1.3985175555013858	0.9999346222063524	0.2323592630205601	0.2227810949265828
GOTERM_CC_DIRECT	GO:0031965~nuclear membrane	25	2.021018593371059	0.014942867147623697	PHF20, MRGPRF, IPO5, AQP1, MTDH, SCRN1, ALOX5, ABL1, TSPO, QSOX2, SEPHS1, RAP1GAP2, NDC1, CERS4, AKIRIN1, SUN1, PRPF38A, GCH1, NUP155, PML, MCM3AP, ELF4, MRTO4, GAPDH, SLC29A2	1191	229	18224	1.6704615034886834	0.9999478528991508	0.2323592630205601	0.2227810949265828
GOTERM_CC_DIRECT	GO:0000502~proteasome complex	10	0.8084074373484237	0.01525411955707494	PSMA5, USP14, PSMA4, PSME1, UBQLN1, HSPB1, PSME2, PSMB8, PSMB10, PSMB9	1191	60	18224	2.5502378953260565	0.9999576031979944	0.2323592630205601	0.2227810949265828
GOTERM_CC_DIRECT	GO:0005881~cytoplasmic microtubule	9	0.7275666936135812	0.016755070284546	CLIP2, TUBA1B, CLMP, TUBA1A, BIRC5, KIF2C, BCL10, TUBG2, MID1	1191	51	18224	2.7002518891687664	0.9999843892525851	0.24942206900858255	0.2391405486067021
GOTERM_CC_DIRECT	GO:0016235~aggresome	7	0.5658852061438965	0.01854612705092046	MECOM, POLD1, UBD, HSPB7, UBQLN1, MVB12A, TRIM37	1191	33	18224	3.245757321324072	0.9999952708835532	0.26958954332483	0.25847669192060035
GOTERM_CC_DIRECT	GO:0031901~early endosome membrane	15	1.2126111560226354	0.018933006096094933	ABCA7, HPS6, HLA-A, MTMR4, CLCN3, PML, HLA-E, VAMP8, CLIP3, SNX1, RAC1, B2M, SNX8, TMEM9B, APPL1	1191	116	18224	1.9786328498219403	0.999996347202886	0.26958954332483	0.25847669192060035
GOTERM_CC_DIRECT	GO:0031982~vesicle	16	1.2934518997574778	0.01980328388380134	PLA2G4F, IFNGR1, GSTP1, CIB1, MIF, RAB11A, VAMP8, SNX1, PKM, TSPAN4, MVB12A, EPS8L2, GAPDH, GPRC5C, TSPAN1, CAPS	1191	128	18224	1.9126784214945425	0.9999979574424992	0.2759819349763803	0.2646055804048349
GOTERM_CC_DIRECT	GO:0005874~microtubule	31	2.506063055780113	0.021170913337011904	MACF1, DCTN1, NDRG1, KIF15, TUBA1B, RASSF1, TUBA1A, DPYSL2, FAM110C, STMN1, MAP7, NEK2, MAP4, NINL, IGBP1, ODF2, MID1IP1, NEK6, TBCD, RMDN3, TUBG2, MID1, EML2, LRPPRC, DNM2, DYNC1LI1, INCENP, MAP1B, MAP1A, BIRC5, KIF2C	1191	311	18224	1.52522266408568	0.9999991815401016	0.28433876806426417	0.2726179333501648
GOTERM_CC_DIRECT	GO:0005875~microtubule associated complex	7	0.5658852061438965	0.02131228747885346	CLIP2, MAP1B, MAP1A, MAP7, MAP4, MID1, EML2	1191	34	18224	3.1502938706968933	0.999999255424188	0.28433876806426417	0.2726179333501648
GOTERM_CC_DIRECT	GO:0035371~microtubule plus-end	5	0.40420371867421184	0.02170524947055452	CLIP2, DCTN1, KIF2C, CKAP5, MAPRE2	1191	17	18224	4.500419815281276	0.9999994276408202	0.28433876806426417	0.2726179333501648
GOTERM_CC_DIRECT	GO:0030478~actin cap	3	0.2425222312045271	0.023395398747853517	GSN, CALD1, WASL	1191	4	18224	11.476070528967256	0.9999998155868824	0.2911803380244907	0.2791774843960002
GOTERM_CC_DIRECT	GO:0071953~elastic fiber	3	0.2425222312045271	0.023395398747853517	MFAP4, ELN, FBLN5	1191	4	18224	11.476070528967256	0.9999998155868824	0.2911803380244907	0.2791774843960002
GOTERM_CC_DIRECT	GO:0001527~microfibril	4	0.32336297493936944	0.023561157122592376	MFAP4, MFAP2, LTBP1, FBN1	1191	10	18224	6.120570948782534	0.999999834991606	0.2911803380244907	0.2791774843960002
GOTERM_CC_DIRECT	GO:0005884~actin filament	10	0.8084074373484237	0.024727074832625068	WIPF1, SRC, PALLD, TPM2, TPM1, FLNA, FYN, MYO9B, RAC1, CORO1B	1191	65	18224	2.3540657495317445	0.999999924553358	0.2999302595438781	0.2875667221275656
GOTERM_CC_DIRECT	GO:0000118~histone deacetylase complex	7	0.5658852061438965	0.027651339628364843	HDAC5, HINT1, MECOM, MBD2, SAP18, TRERF1, HDAC7	1191	36	18224	2.9752775445470667	0.9999999894458508	0.3293023173923449	0.31572802339296585
GOTERM_CC_DIRECT	GO:0005635~nuclear envelope	18	1.4551333872271623	0.030754228737651063	NDC1, SREBF1, SUN1, SEC13, UBE2I, NUP188, NUP155, DCTN1, SPAG4, ROGDI, MGST2, NUP160, CENPF, SLC22A18, ALOX5, S100A6, CHMP2A, NEMP1	1191	159	18224	1.7322370609761892	0.9999999986991888	0.34842039532671193	0.3340580278857635
GOTERM_CC_DIRECT	GO:0042612~MHC class I protein complex	4	0.32336297493936944	0.030852493021296633	HLA-A, MR1, B2M, HLA-E	1191	11	18224	5.564155407984123	0.999999998782768	0.34842039532671193	0.3340580278857635
GOTERM_CC_DIRECT	GO:0002116~semaphorin receptor complex	4	0.32336297493936944	0.030852493021296633	NRP2, PLXNB3, PLXNA1, PLXNB2	1191	11	18224	5.564155407984123	0.999999998782768	0.34842039532671193	0.3340580278857635
GOTERM_CC_DIRECT	GO:0001891~phagocytic cup	5	0.40420371867421184	0.0318768175099327	SYT11, TRIP10, ABCA7, RAC1, DNM2	1191	19	18224	4.0266914136727205	0.999999999391086	0.35388670286450713	0.33929900671589386
GOTERM_CC_DIRECT	GO:0030173~integral component of Golgi membrane	9	0.7275666936135812	0.033882384849538615	ST6GAL1, B4GAT1, ENTPD4, UNC50, CSGALNACT2, ST3GAL5, QSOX2, ST3GAL2, YIF1B	1191	58	18224	2.3743594197863285	0.9999999998434509	0.3646815010076872	0.34964882844706496
GOTERM_CC_DIRECT	GO:0015630~microtubule cytoskeleton	16	1.2934518997574778	0.03396270467399835	CLIC4, MID1IP1, TUBG2, CKAP5, MID1, NDRG1, RASSF1, VPS41, MAP7, ID3, KIF2C, MAP4, KIFAP3, GAPDH, MAPRE2, SPTAN1	1191	137	18224	1.787028014243076	0.999999999851748	0.3646815010076872	0.34964882844706496
GOTERM_CC_DIRECT	GO:1990111~spermatoproteasome complex	3	0.2425222312045271	0.03731677079623763	PSMB8, PSMB10, PSMB9	1191	5	18224	9.180856423173804	0.9999999999848076	0.38777140411990496	0.3717869340264127
GOTERM_CC_DIRECT	GO:0005797~Golgi medial cisterna	3	0.2425222312045271	0.03731677079623763	TMEM59, B3GALT6, HLA-A	1191	5	18224	9.180856423173804	0.9999999999848076	0.38777140411990496	0.3717869340264127
GOTERM_CC_DIRECT	GO:0005768~endosome	23	1.8593371059013744	0.0380509426399168	ARRDC4, ARSA, UNC93B1, WDR72, CYBA, SNX33, NSG1, TMEM175, DNM2, RAB10, ARPC2, RAPGEF1, S1PR1, OCIAD1, GRB2, FYN, OCIAD2, PKN1, CTSE, KCNK1, YKT6, ANKRD50, ABCG1	1191	225	18224	1.5641459091333143	0.9999999999907826	0.38777140411990496	0.3717869340264127
GOTERM_CC_DIRECT	GO:0010369~chromocenter	4	0.32336297493936944	0.039183325911396574	MBD6, INCENP, CBX1, CDCA8	1191	12	18224	5.100475790652114	0.9999999999957386	0.38777140411990496	0.3717869340264127
GOTERM_CC_DIRECT	GO:0071944~cell periphery	7	0.5658852061438965	0.03930127380390973	KRT19, ITGA3, RAC3, CTNNB1, CIB1, CORO1B, NKD2	1191	39	18224	2.7464100411203685	0.999999999996068	0.38777140411990496	0.3717869340264127
GOTERM_CC_DIRECT	GO:0005764~lysosome	23	1.8593371059013744	0.03966516652829562	ARSA, RAMP2, TINAGL1, ANKRD27, FNBP1, UNC93B1, SRC, RNASET2, GLMP, BCL10, MTOR, TMEM175, TMEM59, SYT11, KCNQ1, SNX14, HYAL2, RRAGD, PPT1, TRIP10, CTSH, CAPN1, CD34	1191	226	18224	1.5572249095353796	0.999999999996932	0.38777140411990496	0.3717869340264127
GOTERM_CC_DIRECT	GO:0005643~nuclear pore	10	0.8084074373484237	0.04409684828140553	NDC1, MCM3AP, XPOT, NUP155, MX2, MVP, KPNA2, NUP160, IPO5, MAD2L1	1191	72	18224	2.1251982461050467	0.9999999999998516	0.413809137680002	0.3967513564321241
GOTERM_CC_DIRECT	GO:0030018~Z disc	14	1.131770412287793	0.04423061435744512	HSPB1, PARVA, PARVB, FBXO32, KRT19, PPP3CB, PDLIM3, PALLD, CFL2, FLNA, CTNNB1, PGM5, FLNC, MYL9	1191	118	18224	1.8154235865032944	0.9999999999998648	0.413809137680002	0.3967513564321241
GOTERM_CC_DIRECT	GO:0005839~proteasome core complex	5	0.40420371867421184	0.044412952143802864	PSMA5, PSMA4, PSMB8, PSMB10, PSMB9	1191	21	18224	3.6431969933229382	0.9999999999998808	0.413809137680002	0.3967513564321241
GOTERM_CC_DIRECT	GO:0005654~nucleoplasm	204	16.49151172190784	0.04485564698516052	MDC1, RPL3, TRRAP, TONSL, UBE2L6, PPP2R2A, ADARB1, HS6ST2, SMC2, CDC20, BAIAP2L1, FAM110C, RPS6KA1, CHEK1, AKT3, JUNB, TP63, IMP3, PRKCD, MED8, SOX12, MIF, HCFC1, DYNC1LI1, KCTD10, PSME1, PSME2, HOXB2, PRKD2, HOXB7, PRKDC, STXBP1, MAPKAP1, CDCA8, WDR61, C9ORF78, PDCD11, RAD21, DPH3, HLTF, HEXIM1, WWTR1, EAF1, TRIP4, PTK6, NMI, BTBD10, NPLOC4, ID2, AGO2, ID1, ID3, MMS19, GRB2, APOBEC3A, BAP1, FERM…	1191	2784	18224	1.1212252815657662	0.9999999999999118	0.413809137680002	0.3967513564321241
GOTERM_CC_DIRECT	GO:0005813~centrosome	38	3.071948261924009	0.04718857632462695	CLIC4, DCTN1, CIB1, NDRG1, KIF15, CDC20, PRKAR2A, BLOC1S2, CHEK1, MVB12A, POC1A, LEO1, NEK2, RPRD1B, KIFAP3, DCAF13, RAP1GAP2, ODF2, KLHL21, CKAP5, PLEKHA7, RAB11A, DNM2, MIB1, SKI, SGO1, DYNC1LI1, MZT2A, CENPF, ESPL1, DDAH2, ID2, CCDC8, ID1, CTNNB1, AUNIP, KIZ, NFE2L2	1191	426	18224	1.3649160566533822	0.9999999999999822	0.4292849651754256	0.41158924905369054
GOTERM_CC_DIRECT	GO:0005796~Golgi lumen	12	0.9700889248181084	0.048192461175541414	LUM, WNT7B, BGN, GPC2, SDC1, PRELP, FMOD, AGRN, GPC6, HSPG2, DCN, HS3ST1	1191	96	18224	1.9126784214945425	0.9999999999999912	0.4324118091778031	0.4145872002498631
GOTERM_CC_DIRECT	GO:0045121~membrane raft	21	1.6976556184316896	0.04917197345807546	BCL10, THY1, CBL, TNFRSF1B, TGFBR2, SLC9A1, TNFRSF1A, BST2, CLIP3, EFNB1, ADGRG1, GPRC5B, CASP8, KCNQ1, HYAL2, PPT1, S1PR1, MYADM, FYN, STAT6, PROM2	1191	206	18224	1.5598542466557432	0.9999999999999954	0.43523841371674893	0.4172972882658296

## Sheet: GO_MF
Category	Term	Count	%	PValue	Genes	List Total	Pop Hits	Pop Total	Fold Enrichment	Bonferroni	Benjamini	FDR
GOTERM_MF_DIRECT	GO:0005515~protein binding	745	60.22635408245754	6.255107055531492e-23	RPL4, MDC1, TRIO, RPL3, TRRAP, WIPF1, GPATCH4, ADARB1, RPL9, SMC2, MYLK, FAM110A, PREX1, NDST1, HENMT1, FAM110C, SOX15, DPYSL2, CREB3L1, GJA4, AKT3, DPYSL3, STMN1, LUC7L, JUNB, GSTK1, FNBP1, SERPINF1, PRKCD, MED8, SYTL1, GTPBP2, HSPG2, ATG13, SND1, EML2, HCFC1, DYNC1LI1, RNF126, MAP1B, MAP1A, CLDN7, ORAI3, PSME1, TXNIP, PSME2, PRKD2, RBCK1, HOXB7, HOXB6, HOXB5, PRR13, UNC119B, CFH, PRKDC, MAPKAP1…	1130	8785	16881	1.2668763630685853	7.700036785359266e-20	7.700036785359266e-20	7.599955072470763e-20
GOTERM_MF_DIRECT	GO:0005201~extracellular matrix structural constituent	19	1.5359741309620047	2.5418726633080825e-07	COL15A1, TINAGL1, LUM, LAMA4, ELN, BGN, PRELP, FBLN2, COL1A1, COL3A1, EFEMP2, COL1A2, COL4A2, COL5A1, COL4A1, COL5A3, COL5A2, PXDN, FBN1	1130	67	16881	4.236415268788799	0.00031285561511296134	0.00015645226242661252	0.00015441876429596603
GOTERM_MF_DIRECT	GO:0048407~platelet-derived growth factor binding	8	0.6467259498787389	1.5277453074976396e-06	PDGFRB, COL1A1, PDGFRA, COL3A1, COL1A2, COL5A1, COL4A1, COL6A1	1130	11	16881	10.864682220434434	0.001878888584851968	0.0006268848245098648	0.000618736849536544
GOTERM_MF_DIRECT	GO:0098641~cadherin binding involved in cell-cell adhesion	41	3.3144704931285367	1.024105044060993e-05	MACF1, LAD1, SRC, RPL34, HDLBP, ASAP1, CBL, NDRG1, CORO1B, CNN3, PDLIM1, SNX1, BAIAP2L1, CALD1, COBLL1, FLNA, EPS8L1, EPS8L2, RPS2, ERC1, YKT6, SPTAN1, S100A11, SPTBN2, UNC45A, STAT1, ARHGEF16, DAB2IP, PARVA, CKAP5, SND1, VASN, HCFC1, RAB10, PKM, GIPC1, CTNNB1, ALDOA, TLN1, DBN1, EPHA2	1130	290	16881	2.112056759231004	0.01252766485849688	0.0031516832730977056	0.0031107190713352663
GOTERM_MF_DIRECT	GO:0050840~extracellular matrix binding	10	0.8084074373484237	2.86421033954734e-05	ADGRG1, SPARC, OLFML2B, ELN, BGN, SPARCL1, SSC5D, FBLN2, DCN, VEGFA	1130	26	16881	5.74574540503744	0.03464457966709111	0.00705168585596555	0.006960031125100036
GOTERM_MF_DIRECT	GO:0003779~actin binding	37	2.9911075181891675	0.00010581522385761032	MACF1, TAGLN, WIPF1, EPB41, WASL, MYLK, CNN3, BAIAP2L1, CALD1, ENC1, EPS8L1, EPS8L2, VILL, TNS4, MYH10, SPTAN1, CAP2, SPTBN2, GSN, LIMCH1, TPM2, TPM1, AFAP1, MYO9B, PARVA, PARVB, SSH3, ENAH, INF2, MLPH, KLHL5, PALLD, GIPC1, EVL, ALDOA, DBN1, MSRB1	1130	278	16881	1.9882759279302218	0.12213761341082095	0.021709756761453054	0.02142758283116609
GOTERM_MF_DIRECT	GO:0005518~collagen binding	14	1.131770412287793	0.00013482127353357925	DDR1, SPARC, SMAD3, PCOLCE2, ITGA3, LUM, P3H1, PODN, DCN, ADGRG1, CHADL, COL5A3, SPARCL1, DDR2	1130	60	16881	3.4857522123893805	0.15293358599054485	0.02370928395997657	0.02340112104904268
GOTERM_MF_DIRECT	GO:0005178~integrin binding	19	1.5359741309620047	0.0001936375985661526	LAMA5, COL16A1, LAMB2, SRC, ITGA3, THY1, CX3CL1, FBLN5, COL3A1, COL5A1, TSPAN4, TIMP2, S1PR3, S1PR2, ITGA5, MFGE8, TLN1, JAM3, FBN1	1130	105	16881	2.703236409608091	0.212105408581206	0.02979598547936673	0.029408710282234424
GOTERM_MF_DIRECT	GO:0008022~protein C-terminus binding	26	2.1018593371059016	0.0004749342432661651	MDC1, SRC, HSPB7, CIB1, BCL10, MKI67, FBLN5, CDC20, PDZD11, BLOC1S2, ABL1, MID1IP1, ATP1B1, HSPG2, SDCBP2, EML2, CENPF, ID1, ERCC2, AGO2, CTNNB1, SDC1, PICK1, TAX1BP3, VIM, SAE1	1130	182	16881	2.134134007585335	0.4427731947468416	0.05922499878780775	0.05845521813743819
GOTERM_MF_DIRECT	GO:0051015~actin filament binding	21	1.6976556184316896	0.00048111290648097276	MACF1, SVIL, ANXA8L1, HIP1, WIPF1, TPM2, TPM1, TRIOBP, LRPPRC, CORO1B, ARPC2, ARPC3, CFL2, ABL1, FLNA, PICK1, ANXA8, FLNC, TLN1, MYH10, CTNNAL1	1130	132	16881	2.3766492357200324	0.4469973597987688	0.05922499878780775	0.05845521813743819
GOTERM_MF_DIRECT	GO:0017124~SH3 domain binding	19	1.5359741309620047	0.0009212832258352004	WIPF1, DAB2IP, ARHGAP17, CYBA, CBL, QKI, DNM2, ADAM19, ENAH, SH3BP1, ADAM12, DPYSL3, RAPGEF1, ABL1, MVB12A, GRB2, EVL, ELMO3, CRB3	1130	119	16881	2.3852085967130217	0.6784564821179238	0.10309996827301196	0.1017599199445244
GOTERM_MF_DIRECT	GO:0004871~signal transducer activity	27	2.1827000808407435	0.001156004072248518	CD40, CBL, GNA15, GNG10, GNA12, STMN1, FLNA, STAT6, PLCG1, SH2B3, APOL3, PSD, NDFIP2, NDFIP1, IL1R1, STAT1, NEK6, TNK1, GNG11, BST2, TOLLIP, GNB1, GNB4, CTNNB1, PLCH2, PLCD3, TMEM9B	1130	204	16881	1.9772123893805311	0.7592182043781688	0.11858675107816047	0.11704541231516245
GOTERM_MF_DIRECT	GO:0019900~kinase binding	14	1.131770412287793	0.0013011094343423127	SP100, MIDN, SRC, PRKCD, DAB2IP, SLC2A1, BCL10, SGO1, TOLLIP, DGKQ, UBQLN1, FLNA, CTNNB1, TNS2	1130	75	16881	2.7886017699115038	0.7986495968709998	0.1232050548981067	0.12160368944045462
GOTERM_MF_DIRECT	GO:0042802~identical protein binding	72	5.8205335489086485	0.0017622005267158714	COL18A1, SLC2A1, HSPB1, MSANTD3, PYCARD, CASP8, DPYSL2, LUC7L, EMILIN1, SEPHS1, B2M, TP63, APPL1, SEC13, TLE1, RIPK3, DESI1, FNBP1, CAD, CTPS1, MID1, SDCBP2, HCFC1, AIM2, CLDN7, FKBP8, PADI3, BIRC5, PSME2, PICK1, ALDOA, MICU1, GAPDH, MAPRE2, SP100, STXBP1, MVP, BCL10, SNX33, CORO1B, SRM, SNX1, SRPX2, ALS2CL, BAG2, UBQLN1, HACL1, FYN, STAT6, BAK1, SNX8, CAP2, SMAD3, TGFB3, STAT1, GOT2, DAB2IP, PYC…	1130	749	16881	1.4360527901508795	0.8859573115006103	0.1549477748848027	0.15293383142569889
GOTERM_MF_DIRECT	GO:0036312~phosphatidylinositol 3-kinase regulatory subunit binding	5	0.40420371867421184	0.0019097065761389926	DAB2IP, CBL, PTPN13, FAM83A, DNM2	1130	9	16881	8.299410029498523	0.9049256795644692	0.15672325301513998	0.1546862326672584
GOTERM_MF_DIRECT	GO:0005161~platelet-derived growth factor receptor binding	6	0.4850444624090542	0.002261402149270046	PDGFRB, PDGFRA, IL1R1, PDGFC, ITGA5, VEGFA	1130	15	16881	5.9755752212389375	0.9383904525301688	0.17398662785946414	0.1717252257101941
GOTERM_MF_DIRECT	GO:0005200~structural constituent of cytoskeleton	17	1.3742926434923202	0.002611561969379267	HIP1, EPB41, TPM1, SORBS3, NDC80, TUBA1B, KRT19, TUBA1A, ARPC2, ARPC3, KRT15, VILL, VIM, AGRN, TLN1, SPTAN1, SPTBN2	1130	110	16881	2.308744971842317	0.9600064854726728	0.1745050667196115	0.17223692612861735
GOTERM_MF_DIRECT	GO:0008134~transcription factor binding	33	2.6677445432497984	0.0026553985970387763	FOXA1, HDAC5, GTF2A2, SP100, FOXC1, THRA, PRKDC, SRF, TWIST1, BCL10, PDCD11, IFI16, FLNA, E2F2, HES1, APBB1, JUNB, CD34, UBE2I, TLE1, SMAD3, TRERF1, SORBS3, HEYL, CENPF, MAFB, ZEB1, KLF5, CSDC2, ID1, ID3, CTNNB1, TRIB2	1130	284	16881	1.735862520254269	0.962112852819102	0.1745050667196115	0.17223692612861735
GOTERM_MF_DIRECT	GO:0030976~thiamine pyrophosphate binding	4	0.32336297493936944	0.002693416951805539	ILVBL, OGDH, HACL1, DHTKD1	1130	5	16881	11.951150442477875	0.9638496787256242	0.1745050667196115	0.17223692612861735
GOTERM_MF_DIRECT	GO:0019899~enzyme binding	37	2.9911075181891675	0.003021774228206341	CD40, TRIO, PRKDC, SRC, MST1R, BCL10, ARRB2, MAT2B, SLC4A2, CDC20, PYCARD, PREX1, PPP3CB, POLD1, HYAL2, FYN, RPS2, RAC1, A2M, NCOA1, PDGFRB, PARP4, UBE2I, STAT1, CBX1, PRKCD, CAD, GOT2, UBE4B, SUPT5H, DNM2, TSPAN14, BIRC5, CTNNB1, PICK1, MMS19, TMBIM6	1130	333	16881	1.659882005899705	0.9758974015954012	0.1762013260660875	0.17391113823744622
GOTERM_MF_DIRECT	GO:0050431~transforming growth factor beta binding	6	0.4850444624090542	0.003109886768157444	TGFB3, HYAL2, LTBP3, LTBP1, VASN, TGFBR2	1130	16	16881	5.6021017699115045	0.9783821458800313	0.1762013260660875	0.17391113823744622
GOTERM_MF_DIRECT	GO:0005547~phosphatidylinositol-3,4,5-trisphosphate binding	9	0.7275666936135812	0.003149008264381742	CYTH3, ANXA8L1, MAPKAP1, ARAP3, ANXA8, ASAP1, GAB2, FERMT2, PHLDA3	1130	38	16881	3.5381695388914767	0.9794016740440148	0.1762013260660875	0.17391113823744622
GOTERM_MF_DIRECT	GO:0080025~phosphatidylinositol-3,5-bisphosphate binding	7	0.5658852061438965	0.003322249228649809	HIP1, MAPKAP1, SNX14, SH3PXD2B, WIPI1, WIPI2, PHLDA3	1130	23	16881	4.546633320507888	0.9833691748228979	0.17781255654208325	0.1755014266438921
GOTERM_MF_DIRECT	GO:0043184~vascular endothelial growth factor receptor 2 binding	4	0.32336297493936944	0.005119179437255888	GREM1, DAB2IP, ITGA5, VEGFA	1130	6	16881	9.95929203539823	0.9981962635117928	0.2559092254435284	0.2525830291745629
GOTERM_MF_DIRECT	GO:0043325~phosphatidylinositol-3,4-bisphosphate binding	7	0.5658852061438965	0.005197181670258497	ANXA8L1, HIP1, MAPKAP1, ARAP3, ANXA8, GAB2, PHLDA3	1130	25	16881	4.182902654867257	0.9983622198942528	0.2559092254435284	0.2525830291745629
GOTERM_MF_DIRECT	GO:0031625~ubiquitin protein ligase binding	32	2.5869037995149555	0.005717570432772836	CDKN1A, CD40, BCL10, ARRB2, TRIOBP, SMG5, NKD2, TUBA1B, CASP8, CASP10, PRKAR2A, SLC22A18, HLTF, TNFRSF14, EGR2, UBE2I, SMAD3, TNFRSF1B, SMAD6, MID1, LRPPRC, RNF40, PML, SKI, NPLOC4, SYT11, TOLLIP, TXNIP, TMBIM6, TRIM37, ANKRA2, TRIB2	1130	287	16881	1.6656655668958709	0.9991399562521136	0.2679359576391349	0.26445344316129066
GOTERM_MF_DIRECT	GO:0004672~protein kinase activity	38	3.071948261924009	0.005876743181362015	EPHB6, DDR1, PNCK, NPR1, PRKDC, PKN3, SRC, RASSF2, AKT3, CHEK1, RPS6KA1, MKNK2, ABL1, PIM3, NEK2, BUB1, MAP4K4, MAP3K5, CDK18, PDGFRA, MAP3K3, RIPK3, MMD, NEK6, PRKCD, RIPK4, CAD, STYK1, MTOR, MAPK13, CLK1, MAPK11, ERN2, ERCC2, PRKD2, PKN1, COQ8A, TRIB2	1130	359	16881	1.5812803510242317	0.999293799581748	0.2679359576391349	0.26445344316129066
GOTERM_MF_DIRECT	GO:0046332~SMAD binding	9	0.7275666936135812	0.006947675116889555	SKI, COL3A1, COL1A2, CREB3L1, COL5A2, CTNNB1, FLNA, PML, TGFBR2	1130	43	16881	3.1267544762296766	0.9998126321391808	0.3054495738889658	0.3014794738221718
GOTERM_MF_DIRECT	GO:0008499~UDP-galactose:beta-N-acetylglucosamine beta-1,3-galactosyltransferase activity	5	0.40420371867421184	0.008734040159094856	B3GALNT1, B3GNT8, B3GALT4, B3GNT3, B3GALT6	1130	13	16881	5.74574540503744	0.9999795766376108	0.3583867811948589	0.3537286264433417
GOTERM_MF_DIRECT	GO:0097153~cysteine-type endopeptidase activity involved in apoptotic process	5	0.40420371867421184	0.008734040159094856	PYCARD, CASP7, CASP8, CASP4, CASP1	1130	13	16881	5.74574540503744	0.9999795766376108	0.3583867811948589	0.3537286264433417
GOTERM_MF_DIRECT	GO:0005080~protein kinase C binding	9	0.7275666936135812	0.010478149536571295	HDAC5, HINT1, SRC, ABL1, HSPB1, PICK1, PKN1, DACT1, HDAC7	1130	46	16881	2.9228357060407855	0.9999976630283048	0.41608393804900856	0.4106758608688427
GOTERM_MF_DIRECT	GO:0015433~peptide antigen-transporting ATPase activity	3	0.2425222312045271	0.012810866622613123	TAP2, TAP1, TAPBP	1130	3	16881	14.938938053097345	0.999999872105832	0.4859559303603753	0.4796396875612152
GOTERM_MF_DIRECT	GO:0005089~Rho guanyl-nucleotide exchange factor activity	12	0.9700889248181084	0.013086853745369964	PREX1, FGD5, DNMBP, TRIO, ALS2CL, PLEKHG2, ARHGEF25, ARHGEF17, ARHGEF16, EPS8L1, EPS8L2, ARHGEF10L	1130	77	16881	2.3281461900930926	0.9999999093499944	0.4859559303603753	0.4796396875612152
GOTERM_MF_DIRECT	GO:0004601~peroxidase activity	6	0.4850444624090542	0.013422015948215077	DUOX1, PRDX5, PXDN, GPX7, DUOX2, TXNDC17	1130	22	16881	4.074255832662913	0.999999940327022	0.4859559303603753	0.4796396875612152
GOTERM_MF_DIRECT	GO:0003924~GTPase activity	26	2.1018593371059016	0.013832381320768316	TUBA1B, GNA15, RHOT2, GNG10, TUBA1A, RAB23, GNA12, RAC3, RAC1, GBP2, GBP4, GBP3, MX2, RAB27B, TUBG2, GTPBP2, GNG11, GEM, RAB11A, DNM2, RAB10, ARL4C, RAP2A, MRAS, GNB1, RRAGD	1130	234	16881	1.659882005899705	0.9999999642431988	0.4865046115961656	0.4801812372781002
GOTERM_MF_DIRECT	GO:0043130~ubiquitin binding	12	0.9700889248181084	0.014343985056673015	NPLOC4, SMAD3, RNF216, TOLLIP, UBTD2, MVB12A, HSPB1, UBE2L6, BCL10, RBCK1, UCHL3, CKS1B	1130	78	16881	2.298298162014976	0.9999999811227596	0.4904846001323467	0.4841094956627143
GOTERM_MF_DIRECT	GO:0005509~calcium ion binding	64	5.173807599029911	0.015809751504095408	FKBP10, ANXA8L1, SPARC, USP32, DGKA, CIB1, CAPN8, PPP3CB, EFEMP2, CAPNS2, CRTAC1, ANXA6, ANXA8, CAPN1, SPTAN1, NINL, ARSA, CD93, SYTL1, ANXA10, HSPG2, RCN3, SELENON, GPD2, CDH11, S100A6, PADI3, FAM20C, SPARCL1, FKBP9, MICU1, MYL9, NOTCH2, MACF1, LTBP2, LTBP3, CBL, FBLN2, FSTL1, LTBP1, FBLN5, FSTL4, NKD2, PRRG4, DUOX1, RHOT2, PRRG2, SPOCK1, PLCG1, S100A11, DUOX2, GSN, GCH1, SYT8, SMOC2, EHD3, SYT1…	1130	717	16881	1.3334616951160811	0.9999999969778224	0.5259947054470663	0.5191580561479979
GOTERM_MF_DIRECT	GO:0005031~tumor necrosis factor-activated receptor activity	6	0.4850444624090542	0.01939719220536616	CD40, TNFRSF10B, TNFRSF14, TNFRSF1B, TNFRSF21, TNFRSF1A	1130	24	16881	3.7347345132743364	0.9999999999662676	0.6132212014604226	0.6052508202879069
GOTERM_MF_DIRECT	GO:0004197~cysteine-type endopeptidase activity	10	0.8084074373484237	0.019427804108006888	USP14, CASP7, TINAGL1, CASP8, ESPL1, CASP10, CASP4, CASP1, USP1, CTSH	1130	61	16881	2.44900623821268	0.9999999999675394	0.6132212014604226	0.6052508202879069
GOTERM_MF_DIRECT	GO:0032403~protein complex binding	23	1.8593371059013744	0.020094113526469046	NCOA1, IGBP1, BCAP31, SREBF1, CDKN1A, CRTAP, LAMB3, RIPK3, THRA, DAB2IP, P3H1, PPP2R2A, TAPBPL, ARRB2, RNF40, TXN2, DNM2, KRT19, CASP8, GNB1, GNB4, APBB1, FBN1	1130	206	16881	1.6679396855399948	0.9999999999859409	0.6183963437770849	0.6103586983664973
GOTERM_MF_DIRECT	GO:0033743~peptide-methionine (R)-S-oxide reductase activity	3	0.2425222312045271	0.02448782744270543	MSRB3, TXN2, MSRB1	1130	4	16881	11.204203539823007	0.9999999999999444	0.7177265614754854	0.7083978653068357
GOTERM_MF_DIRECT	GO:0046978~TAP1 binding	3	0.2425222312045271	0.02448782744270543	TAP2, TAP1, TAPBP	1130	4	16881	11.204203539823007	0.9999999999999444	0.7177265614754854	0.7083978653068357
GOTERM_MF_DIRECT	GO:0005198~structural molecule activity	26	2.1018593371059016	0.02529914823031118	LAMA5, COL18A1, LAD1, ISCA1, COL15A1, LAMA2, EPB41, TUBA1B, TUBA1A, MAP7, PGM5, MAP4, LAMB3, LAMB2, ODF2, SPAG4, KRT13, KRT7, TUBG2, KRT19, KRT15, MAP1B, CLDN7, MAP1A, VIM, NES	1130	247	16881	1.5725197950628784	0.99999999999998	0.7242616621282107	0.7148480255773972
GOTERM_MF_DIRECT	GO:0019901~protein kinase binding	36	2.9102667744543247	0.029929957684945264	NPR1, MAPKAP1, STXBP1, MVP, HSPB1, CIB1, BCL10, THY1, AP2A2, CKS1B, HDAC7, FAM83H, CAMK2N1, DPYSL2, PLCG1, RAC1, SLC12A6, MAPK6, FAM83A, MAP3K5, PDGFRB, SREBF1, SMAD3, NEK6, PRKCD, DAB2IP, ATG13, MTOR, DNM2, SKI, ACTA2, GPRC5B, CCNY, CTNNB1, GRB2, KIZ	1130	376	16881	1.430323856147618	1.0	0.8373585888674457	0.8264749678911021
GOTERM_MF_DIRECT	GO:0004715~non-membrane spanning protein tyrosine kinase activity	8	0.6467259498787389	0.031921826181879116	CLK1, SRC, TNK1, PRKCD, STYK1, ABL1, FYN, PTK6	1130	46	16881	2.598076183147364	1.0	0.873239289553182	0.8618893069107362
GOTERM_MF_DIRECT	GO:0019904~protein domain specific binding	22	1.7784963621665322	0.0387894913849105	FOXA1, IGBP1, SP100, GSN, THRA, ITGA3, STXBP1, MBD2, STMN3, TWIST1, RAB27B, ARRB2, MLF1, MTOR, SKI, TUBA1A, CHMP2A, PLXNB3, ID3, PICK1, CRB3, NFE2L2	1130	208	16881	1.580079986385296	1.0	0.9165678274208724	0.9046546793796588
GOTERM_MF_DIRECT	GO:0008017~microtubule binding	22	1.7784963621665322	0.0387894913849105	MACF1, DCTN1, MX2, MID1, NDRG1, EML2, LRPPRC, RAB11A, KIF15, CNN3, DNM2, CLIP3, CLIP2, MAP1B, DPYSL2, VPS41, MAP1A, BIRC5, MAP4, GAPDH, MAPRE2, TPT1	1130	208	16881	1.580079986385296	1.0	0.9165678274208724	0.9046546793796588
GOTERM_MF_DIRECT	GO:0001102~RNA polymerase II activating transcription factor binding	7	0.5658852061438965	0.03880657265069257	MAD2L2, EGR2, SMAD3, BHLHE41, CTNNB1, TBX6, NFE2L2	1130	38	16881	2.751909641360037	1.0	0.9165678274208724	0.9046546793796588
GOTERM_MF_DIRECT	GO:0004839~ubiquitin activating enzyme activity	3	0.2425222312045271	0.0390174344361206	UBA7, UBA6, SAE1	1130	5	16881	8.963362831858406	1.0	0.9165678274208724	0.9046546793796588
GOTERM_MF_DIRECT	GO:0030023~extracellular matrix constituent conferring elasticity	3	0.2425222312045271	0.0390174344361206	COL4A1, EMILIN1, FBN1	1130	5	16881	8.963362831858406	1.0	0.9165678274208724	0.9046546793796588
GOTERM_MF_DIRECT	GO:0005044~scavenger receptor activity	8	0.6467259498787389	0.0391718659051184	LGALS3BP, COLEC12, SBSPON, TINAGL1, TMPRSS4, SSC5D, SCARF2, LOXL2	1130	48	16881	2.489823008849557	1.0	0.9165678274208724	0.9046546793796588
GOTERM_MF_DIRECT	GO:0008201~heparin binding	18	1.4551333872271623	0.03923181017290421	POSTN, NRP2, CFH, PCOLCE2, PRELP, LTBP2, FSTL1, VEGFA, SMOC2, ADGRG1, FGF7, CCDC80, COL5A1, CRISPLD2, ADAMTS1, COL5A3, FMOD, FBN1	1130	160	16881	1.6806305309734513	1.0	0.9165678274208724	0.9046546793796588
GOTERM_MF_DIRECT	GO:0042826~histone deacetylase binding	13	1.0509296685529508	0.0394623028865201	HDAC5, SRF, BHLHE41, SMG5, CDC20, NACC2, HES1, PKN1, RAC1, ANKRA2, KPNA2, MEF2D, DACT1	1130	102	16881	1.903982300884956	1.0	0.9165678274208724	0.9046546793796588
GOTERM_MF_DIRECT	GO:0000983~transcription factor activity, RNA polymerase II core promoter sequence-specific	4	0.32336297493936944	0.041641678497263454	HEYL, SMAD3, STAT1, SRF	1130	12	16881	4.979646017699115	1.0	0.9187538262065106	0.9068122655084568
GOTERM_MF_DIRECT	GO:0017154~semaphorin receptor activity	4	0.32336297493936944	0.041641678497263454	NRP2, PLXNB3, PLXNA1, PLXNB2	1130	12	16881	4.979646017699115	1.0	0.9187538262065106	0.9068122655084568
GOTERM_MF_DIRECT	GO:0042803~protein homodimerization activity	62	5.012126111560226	0.04179546244318813	SCARB1, HIP1, ICE1, BHLHE41, PYGL, PLOD1, PYCARD, MECOM, ANXA6, RBPMS2, SEPHS1, CTSE, MAP3K5, PDGFRA, TAP1, MID1, SDCBP2, RNF40, S100A6, BIRC5, ABCG1, GTF2A2, SP100, SRF, HSD17B4, TWIST1, TTK, CLCN3, FBLN5, SRM, SNX1, OXCT1, NACC2, PDGFC, FLNA, HES1, BAK1, MEF2D, S100A11, JAM3, WWTR1, SMAD3, GCH1, STAT1, CBX1, GOT2, DAB2IP, MYO9B, HARS2, PML, VEGFA, BST2, HEYL, GNPTG, GALE, CENPF, SYT11, GIPC1, I…	1130	730	16881	1.2687865195781305	1.0	0.9187538262065106	0.9068122655084568
GOTERM_MF_DIRECT	GO:0008289~lipid binding	17	1.3742926434923202	0.045433213481133015	UNC119B, FNBP1, HDLBP, AP2A2, APOLD1, APOL4, APOL6, FABP6, TRIP10, ANXA6, MVB12A, S1PR3, S1PR2, ESYT1, APOL1, APOL3, APOL2	1130	151	16881	1.6818671980308268	1.0	0.9650312124992632	0.9524881585593864
GOTERM_MF_DIRECT	GO:0017112~Rab guanyl-nucleotide exchange factor activity	6	0.4850444624090542	0.04681836190490976	RGP1, DENND2D, TRAPPC1, DENND2A, DENND5A, RAB3IL1	1130	30	16881	2.9877876106194687	1.0	0.9650312124992632	0.9524881585593864
GOTERM_MF_DIRECT	GO:0004198~calcium-dependent cysteine-type endopeptidase activity	5	0.40420371867421184	0.0478203931457799	CAPN8, CAPN7, CAPNS2, CAPN1, CAPN15	1130	21	16881	3.5568900126422247	1.0	0.9650312124992632	0.9524881585593864
GOTERM_MF_DIRECT	GO:0004298~threonine-type endopeptidase activity	5	0.40420371867421184	0.0478203931457799	PSMA5, PSMA4, PSMB8, PSMB10, PSMB9	1130	21	16881	3.5568900126422247	1.0	0.9650312124992632	0.9524881585593864
GOTERM_MF_DIRECT	GO:0004602~glutathione peroxidase activity	5	0.40420371867421184	0.0478203931457799	GSTK1, GPX2, GSTP1, MGST2, GPX7	1130	21	16881	3.5568900126422247	1.0	0.9650312124992632	0.9524881585593864

## Sheet: KEGG
Category	Term	Count	%	PValue	Genes	List Total	Pop Hits	Pop Total	Fold Enrichment	Bonferroni	Benjamini	FDR
KEGG_PATHWAY	hsa04510:Focal adhesion	39	3.15279	2.64152e-08	LAMA5, LAMA2, SRC, LAMA4, ARHGAP35, MYLK, AKT3, PDGFC, FLNA, RAC3, FYN, FLNC, RAC1, PDGFRB, PDGFRA, LAMB3, LAMB2, ITGA3, PARVA, PARVB, VEGFA, COL1A1, COL3A1, COL1A2, COL4A2, COL5A1, COL4A1, COL6A2, COL5A3, COL5A2, COL6A1, RAPGEF1, COL6A3, CTNNB1, ITGA7, GRB2, ITGA5, TLN1, MYL9	486	206	6879	2.6797	7.26416e-06	7.26419e-06	7.07928e-06
KEGG_PATHWAY	hsa04512:ECM-receptor interaction	22	1.7785	4.00522e-07	LAMA5, LAMA2, LAMB3, LAMB2, ITGA3, LAMA4, HSPG2, COL1A1, COL3A1, COL1A2, COL4A2, COL5A1, COL4A1, COL6A2, COL5A3, COL5A2, COL6A1, COL6A3, SDC1, ITGA7, ITGA5, AGRN	486	87	6879	3.57925	0.000110137	5.50717e-05	5.36699e-05
KEGG_PATHWAY	hsa04974:Protein digestion and absorption	20	1.61681	8.45572e-06	COL18A1, SLC15A1, COL15A1, ELN, COL12A1, ATP1B1, COL1A1, COL3A1, COL1A2, SLC7A8, COL4A2, COL5A1, COL4A1, KCNQ1, COL6A2, COL5A3, COL5A2, COL6A1, COL6A3, SLC38A2	486	88	6879	3.21689	0.00232263	0.000775107	0.000755377
KEGG_PATHWAY	hsa05200:Pathways in cancer	52	4.20372	1.14974e-05	CDKN1A, SLC2A1, CKS1B, RASSF1, FGF7, EDNRA, CASP8, MECOM, AKT3, RAC3, RAC1, APPL1, PDGFRB, PDGFRA, RALBP1, ITGA3, MMP2, F2R, TGFBR2, COL4A2, PAX8, SMO, COL4A1, BIRC5, LAMA5, LAMA2, GSTP1, LAMA4, CBL, GNG10, GNA12, ABL1, E2F2, PLCG1, EGLN3, TCF7L1, SMAD3, LAMB3, TGFB3, LAMB2, STAT1, FZD7, WNT7B, GNG11, MTOR, PML, VEGFA, GNB1, GNB4, CTNNB1, GRB2, FGFR3	486	393	6879	1.87284	0.0031568	0.000790443	0.000770323
KEGG_PATHWAY	hsa05146:Amoebiasis	18	1.45513	0.00108977	LAMA5, ARG2, LAMA2, LAMB3, IL1R1, TGFB3, LAMB2, LAMA4, HSPB1, COL1A1, COL3A1, GNA15, COL1A2, COL4A2, COL5A1, COL4A1, COL5A3, COL5A2	486	106	6879	2.40356	0.259071	0.0504427	0.0491587
KEGG_PATHWAY	hsa04151:PI3K-Akt signaling pathway	41	3.31447	0.00110057	LAMA5, CDKN1A, LAMA2, PKN3, LAMA4, PPP2R2A, FGF7, GNG10, CREB3L1, AKT3, PDGFC, RAC1, PDGFRB, PDGFRA, IL4R, LAMB3, LAMB2, ITGA3, F2R, GNG11, MTOR, VEGFA, COL1A1, COL3A1, COL1A2, COL4A2, COL5A1, COL4A1, COL6A2, COL5A3, COL5A2, COL6A1, GNB1, GNB4, COL6A3, ITGA7, GRB2, PKN1, ITGA5, FGFR3, EPHA2	486	345	6879	1.68211	0.26127	0.0504427	0.0491587
KEGG_PATHWAY	hsa04010:MAPK signaling pathway	32	2.5869	0.00164962	SRF, HSPB1, ARRB2, FGF7, PPP3CB, MECOM, GNA12, AKT3, STMN1, RPS6KA1, MKNK2, FLNA, RAC3, FLNC, RAC1, MAP4K4, MAP3K5, PDGFRB, PDGFRA, MAP3K3, PLA2G4F, DUSP2, TGFB3, IL1R1, TGFBR2, TNFRSF1A, MAPK13, MAPK11, MRAS, GRB2, LAMTOR3, FGFR3	486	253	6879	1.79027	0.364929	0.0617294	0.0601581
KEGG_PATHWAY	hsa05132:Salmonella infection	15	1.21261	0.00179576	IFNGR1, PKN3, IFNGR2, WASL, MAPK13, PYCARD, MAPK11, DYNC1LI1, ARPC2, ARPC3, CASP1, FLNA, FLNC, PKN1, RAC1	486	83	6879	2.55801	0.389989	0.0617294	0.0601581
KEGG_PATHWAY	hsa05166:HTLV-I infection	31	2.50606	0.00341886	CDKN1A, CD40, TRRAP, SRF, SLC2A1, ETS2, CDC20, PPP3CB, POLD1, AKT3, CHEK1, TSPO, E2F2, PDGFRB, PDGFRA, MAP3K3, EGR2, SMAD3, TGFB3, IL1R1, FZD7, WNT7B, HLA-A, TGFBR2, TNFRSF1A, HLA-E, MRAS, CTNNB1, ANAPC4, TLN1, MAD2L1	486	254	6879	1.7275	0.610074	0.0952007	0.0927774
KEGG_PATHWAY	hsa05205:Proteoglycans in cancer	26	2.10186	0.00346184	CDKN1A, SRC, TWIST1, CBL, SLC9A1, AKT3, FLNA, FLNC, PLCG1, RAC1, LUM, FZD7, MMP2, WNT7B, HSPG2, DCN, MTOR, MAPK13, VEGFA, MAPK11, MRAS, SMO, CTNNB1, SDC1, GRB2, ITGA5	486	200	6879	1.84006	0.614671	0.0952007	0.0927774
KEGG_PATHWAY	hsa04370:VEGF signaling pathway	11	0.889248	0.00957555	MAPK11, PLA2G4F, PPP3CB, SRC, AKT3, HSPB1, RAC3, PLCG1, RAC1, MAPK13, VEGFA	486	61	6879	2.55242	0.929063	0.209838	0.204496
KEGG_PATHWAY	hsa04071:Sphingolipid signaling pathway	17	1.37429	0.00973901	CERS4, PPP2R2A, GAB2, MAPK13, TNFRSF1A, MAPK11, SMPD2, GNA12, AKT3, S1PR1, RAC3, FYN, S1PR3, S1PR2, RAC1, DEGS2, MAP3K5	486	120	6879	2.0052	0.932211	0.209838	0.204496
KEGG_PATHWAY	hsa05145:Toxoplasmosis	16	1.29345	0.0099196	LAMA5, CD40, LAMA2, LAMB3, TGFB3, IFNGR1, LAMB2, STAT1, IFNGR2, LAMA4, MAPK13, TNFRSF1A, MAPK11, CASP8, ALOX5, AKT3	486	110	6879	2.05881	0.935527	0.209838	0.204496
KEGG_PATHWAY	hsa05231:Choline metabolism in cancer	15	1.21261	0.0108857	PDGFRB, PDGFRA, PLA2G4F, SLC44A3, SLC44A4, DGKA, WASL, MTOR, DGKQ, PDGFC, AKT3, RAC3, GRB2, PLCG1, RAC1	486	101	6879	2.10213	0.950708	0.213827	0.208384
KEGG_PATHWAY	hsa04810:Regulation of actin cytoskeleton	25	2.02102	0.0123818	SRC, WASL, ARHGAP35, SLC9A1, MYLK, FGF7, CFL2, GNA12, PDGFC, RAC3, RAC1, PDGFRB, PDGFRA, GSN, ITGA3, F2R, SSH3, ENAH, MRAS, ARPC2, ARPC3, ITGA7, ITGA5, FGFR3, MYL9	486	210	6879	1.68504	0.967492	0.215483	0.209998
KEGG_PATHWAY	hsa04110:Cell cycle	17	1.37429	0.0131568	CDKN1A, SMAD3, MCM7, TGFB3, PRKDC, TTK, MAD2L2, CDC20, ESPL1, ORC1, RAD21, CHEK1, ABL1, E2F2, ANAPC4, BUB1, MAD2L1	486	124	6879	1.94051	0.973804	0.215483	0.209998
KEGG_PATHWAY	hsa05131:Shigellosis	11	0.889248	0.0133207	MAD2L2, MAPK11, ARPC2, SRC, ARPC3, ABL1, ELMO3, WASL, RAC1, ITGA5, MAPK13	486	64	6879	2.43277	0.974974	0.215483	0.209998
KEGG_PATHWAY	hsa04360:Axon guidance	17	1.37429	0.0162865	EPHB6, SEMA4A, SEMA4B, SEMA3F, EFNB1, PPP3CB, DPYSL2, CFL2, PLXNB3, ABL1, PLXNB2, PLXNA1, RAC3, FYN, RAC1, EPHB4, EPHA2	486	127	6879	1.89467	0.989064	0.248822	0.242489
KEGG_PATHWAY	hsa04144:Endocytosis	27	2.1827	0.0189349	WIPF1, SRC, ASAP3, ASAP1, WASL, ARRB2, CBL, AP2A2, CYTH3, SNX1, MVB12A, PSD, PDGFRA, SMAD3, ARAP3, HLA-A, PML, RAB11A, TGFBR2, DNM2, HLA-E, RAB10, EHD3, ARPC2, ARPC3, CHMP2A, FGFR3	486	241	6879	1.58575	0.994789	0.274058	0.267082
KEGG_PATHWAY	hsa04611:Platelet activation	17	1.37429	0.019963	PLA2G4F, SRC, F2R, ARHGAP35, MAPK13, MYLK, VAMP8, COL1A1, MAPK11, COL3A1, COL1A2, COL5A1, COL5A3, COL5A2, AKT3, FYN, TLN1	486	130	6879	1.85095	0.996094	0.274491	0.267504
KEGG_PATHWAY	hsa00330:Arginine and proline metabolism	9	0.727567	0.022424	ARG2, P4HA1, ALDH1B1, MAOA, GOT2, PYCR1, PYCR2, SRM, CNDP2	486	50	6879	2.54778	0.998044	0.293648	0.286174
KEGG_PATHWAY	hsa05210:Colorectal cancer	10	0.808407	0.0285747	TCF7L1, SMAD3, TGFB3, AKT3, RAC3, CTNNB1, BIRC5, RAC1, TGFBR2, APPL1	486	62	6879	2.28295	0.999655	0.357184	0.348092
KEGG_PATHWAY	hsa04666:Fc gamma R-mediated phagocytosis	12	0.970089	0.0329028	GSN, ARPC2, ARPC3, CFL2, AKT3, PRKCD, ASAP3, ASAP1, WASL, GAB2, PLCG1, RAC1	486	84	6879	2.02205	0.999899	0.393403	0.383389
KEGG_PATHWAY	hsa05212:Pancreatic cancer	10	0.808407	0.0374265	RALBP1, SMAD3, TGFB3, STAT1, AKT3, RAC3, E2F2, RAC1, TGFBR2, VEGFA	486	65	6879	2.17759	0.999972	0.428845	0.417929
KEGG_PATHWAY	hsa04380:Osteoclast differentiation	16	1.29345	0.0417863	IL1R1, IFNGR1, STAT1, IFNGR2, CYBA, GAB2, MAPK13, TGFBR2, TNFRSF1A, MAPK11, PPP3CB, AKT3, GRB2, FYN, RAC1, JUNB	486	131	6879	1.72877	0.999992	0.455063	0.44348
KEGG_PATHWAY	hsa05416:Viral myocarditis	9	0.727567	0.045048	CD40, CASP8, SGCB, ABL1, RAC3, FYN, HLA-A, RAC1, HLA-E	486	57	6879	2.23489	0.999997	0.455063	0.44348
KEGG_PATHWAY	hsa05100:Bacterial invasion of epithelial cells	11	0.889248	0.0462256	MAD2L2, ARPC2, SRC, ARPC3, CTNNB1, ELMO3, WASL, RAC1, ITGA5, CBL, DNM2	486	78	6879	1.99612	0.999998	0.455063	0.44348
KEGG_PATHWAY	hsa04014:Ras signaling pathway	24	1.94018	0.0467863	PDGFRB, PDGFRA, RALBP1, PLA2G4F, GAB2, GNG11, ETS2, VEGFA, GNG10, FGF7, RASSF1, MRAS, RASA3, PDGFC, AKT3, GNB1, GNB4, ABL1, RAC3, GRB2, PLCG1, RAC1, FGFR3, EPHA2	486	226	6879	1.50311	0.999998	0.455063	0.44348
KEGG_PATHWAY	hsa04664:Fc epsilon RI signaling pathway	10	0.808407	0.0479885	MAPK11, PLA2G4F, AKT3, RAC3, GRB2, FYN, GAB2, PLCG1, RAC1, MAPK13	486	68	6879	2.08152	0.999999	0.455063	0.44348
