# Supplementary material for: WITHDRAWN: Analysis of Autophagy-Related Signatures in The Tumor Immune Microenvironment and Identification of Clinical Prognostic Markers in Bladder Carcinoma
Source: Research Square preprint supplement (doi:10.21203/rs.3.rs-1187613/v1), 2021-12-29
Supplement: Supplementary file 6 [file e9d86901c8d3a3eef609761d.xlsx]

## Sheet: Sheet1
	coef
APOL1	-0.000333500978873987
ATF6	0.0184093572634133
ATIC	0.00862058586286021
BAG1	-0.00157564091178377
CAPN2	0.0091758398211428
CASP1	-0.0190983691760373
CASP8	-0.0486790356630268
DIRAS3	0.0402956533371835
IFNG	-0.0744174385984195
IKBKB	-0.0430680949166852
MAPK3	0.0143813182125949
NAMPT	0.00839509048073619
NPC1	0.000385312273514398
NRG1	0.0265931352581836
P4HB	0.0014287508482672
PIK3C3	0.0658228992981159
RAB24	-0.0196873921835037
RPTOR	0.0193958124777983
SPHK1	0.00207911230381026
STK11	-0.0147384113246311
ULK2	0.0259388562965622
VEGFA	-0.00143001946017315
WDR45	-0.0219911937075871
WIPI1	0.00762533776510075
